# Supplementary material for: Synthetic and structural studies of phosphine coordinated boronium salts
Source: Royal Society of Chemistry journal article supplement (doi:10.1039/c7dt01023k), 2017-01-01
Supplement: c7dt01023k1.pdf [file c7dt01023k1.pdf]

## **Synthetic and Structural Studies of Phosphine Coordinated Boronium Salts**

Anthony F. Hill\*<sup>a</sup> and Jas S. Ward<sup>a</sup>

<sup>a</sup>Research School of Chemistry, Australian National University, Canberra, ACT 2601, Australia.

Electronic Supporting Information (ESI)

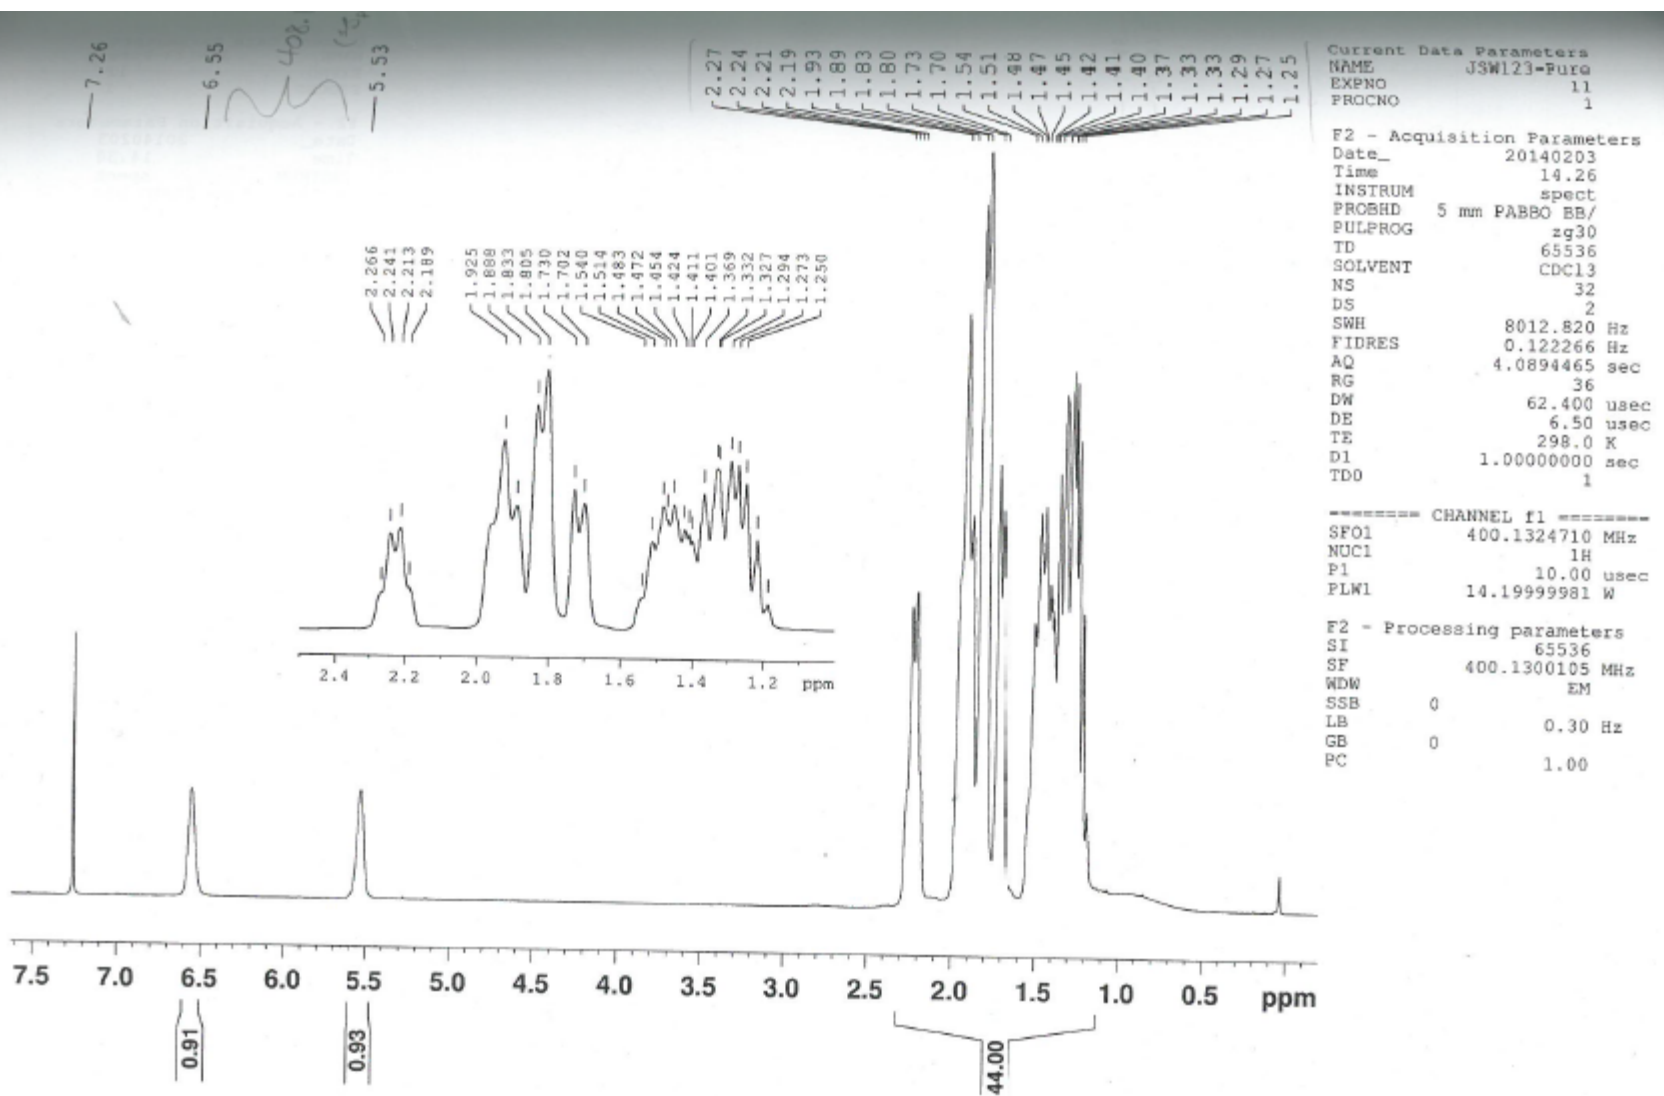

Compound 1 - <sup>1</sup>H NMR spectrum

JSW123-DCM Pent. Precip.  
 Sample Name:  
 JSW123-DCM Pent. Precip.  
 Data Collected on:  
 purcell-inova300  
 Archive directory:  
 /home/hill/vnmrsys/data  
 Sample directory:  
 MS-43-highC\_20110913\_01  
 FidFile: std1h

Pulse Sequence: std1h (s2pul)  
 Solvent: cd2cl2  
 Data collected on: Sep 13 2011

Temp. 25.0 C / 298.1 K  
 Operator: hill

Relax. delay 0.100 sec  
 Pulse 75.0 degrees  
 Acq. time 0.273 sec  
 Width 60015.0 Hz  
 1024 repetitions  
 OBSERVE B11, 96.2341081 MHz  
 DECOUPLE H1, 299.9456701 MHz  
 Power 41 dB  
 continuously on  
 WALTZ-16 modulated  
 DATA PROCESSING  
 Line broadening 3.0 Hz  
 FT size 32768  
 Total time 6 min 32 sec

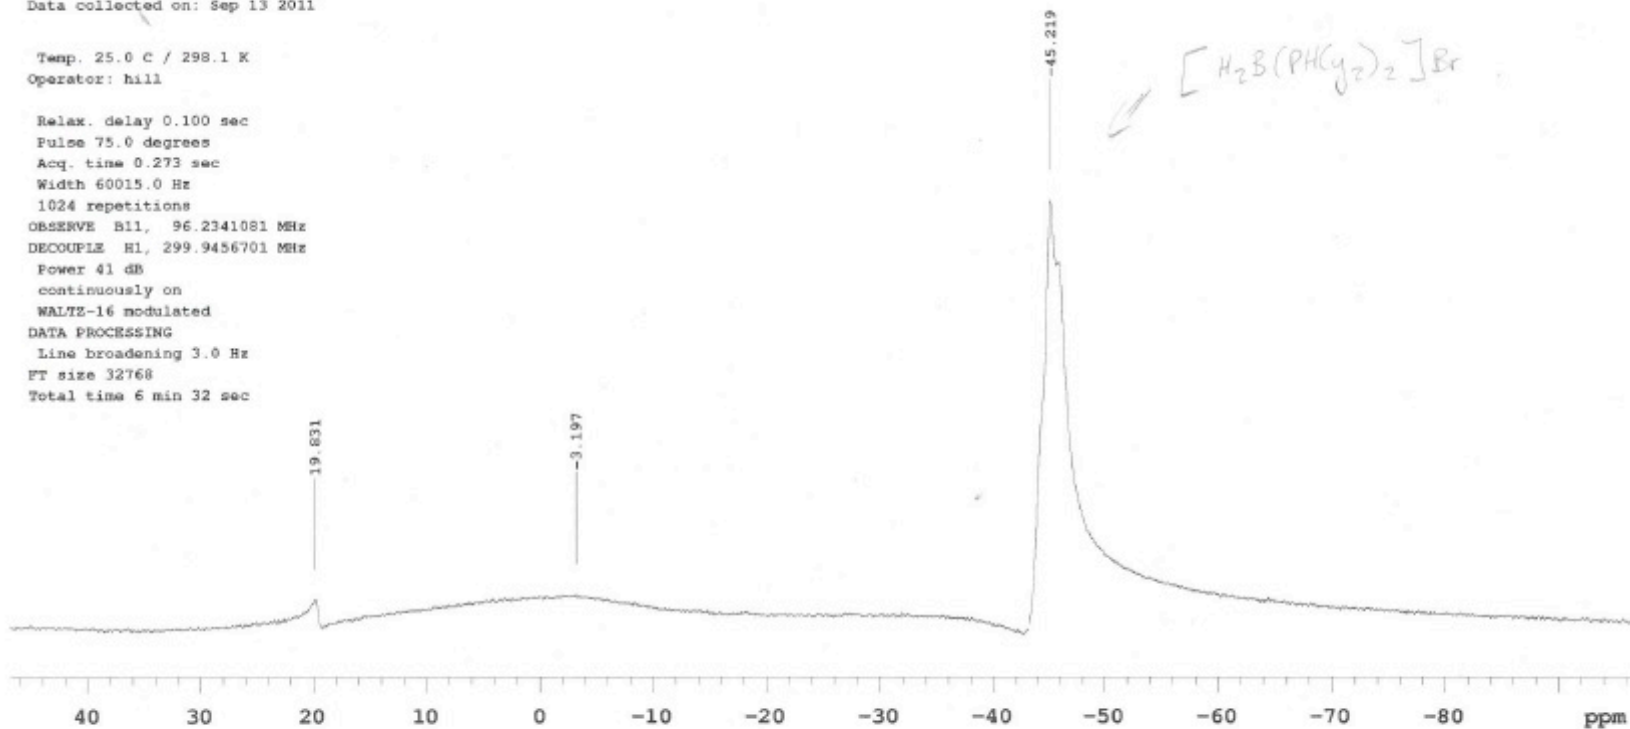

Compound 1 –  $^{11}B\{^1H\}$  NMR spectrum

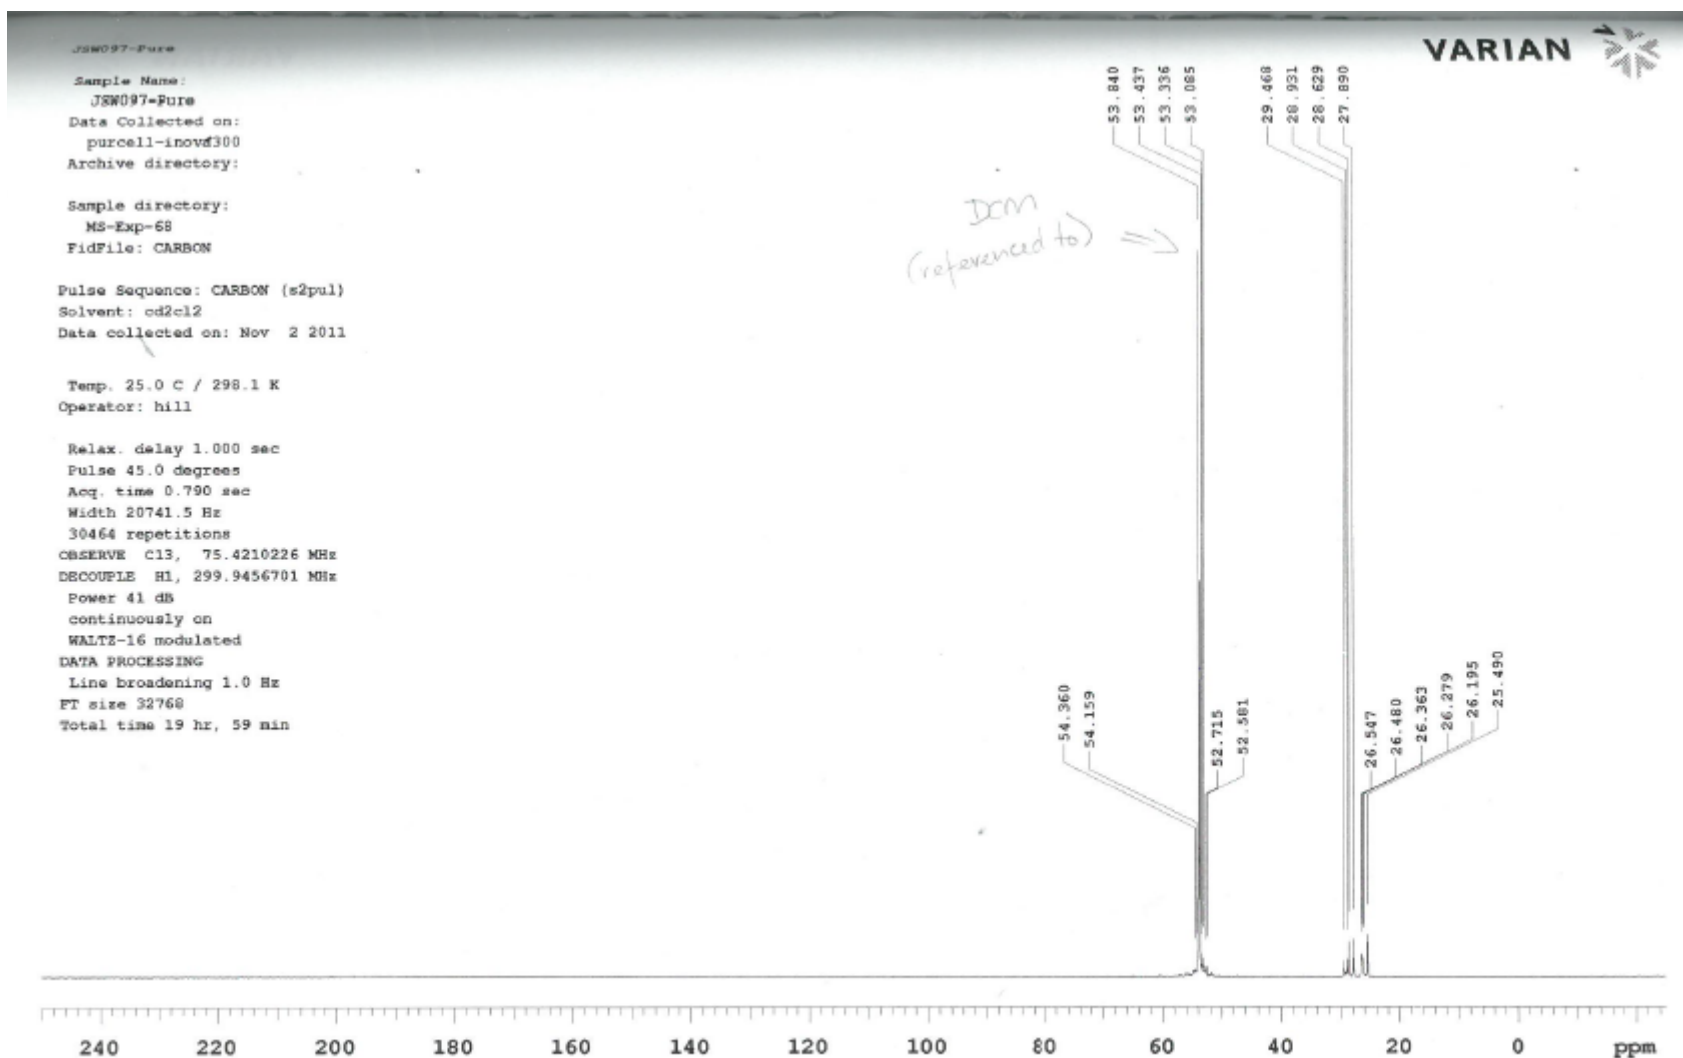

Compound 1 –  $^{13}\text{C}\{^1\text{H}\}$  NMR spectrum

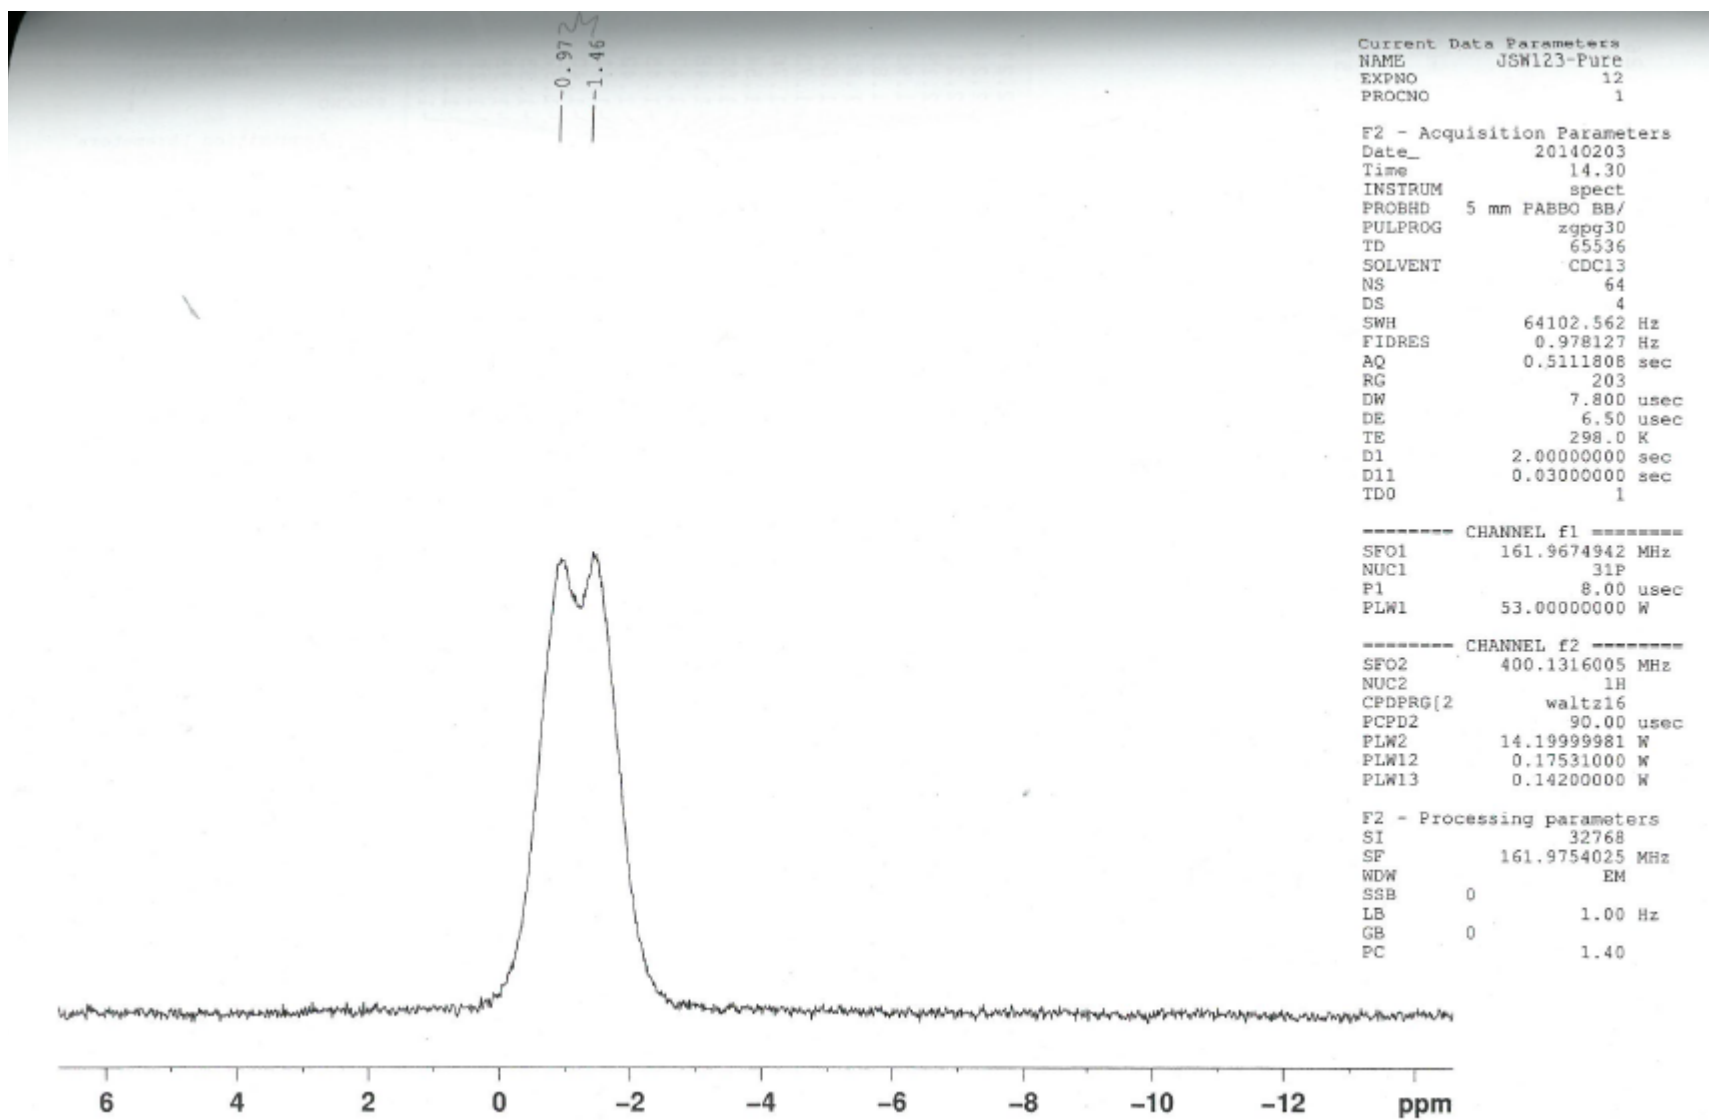

Compound 1 -  $^{31}\text{P}\{^1\text{H}\}$  NMR spectrum

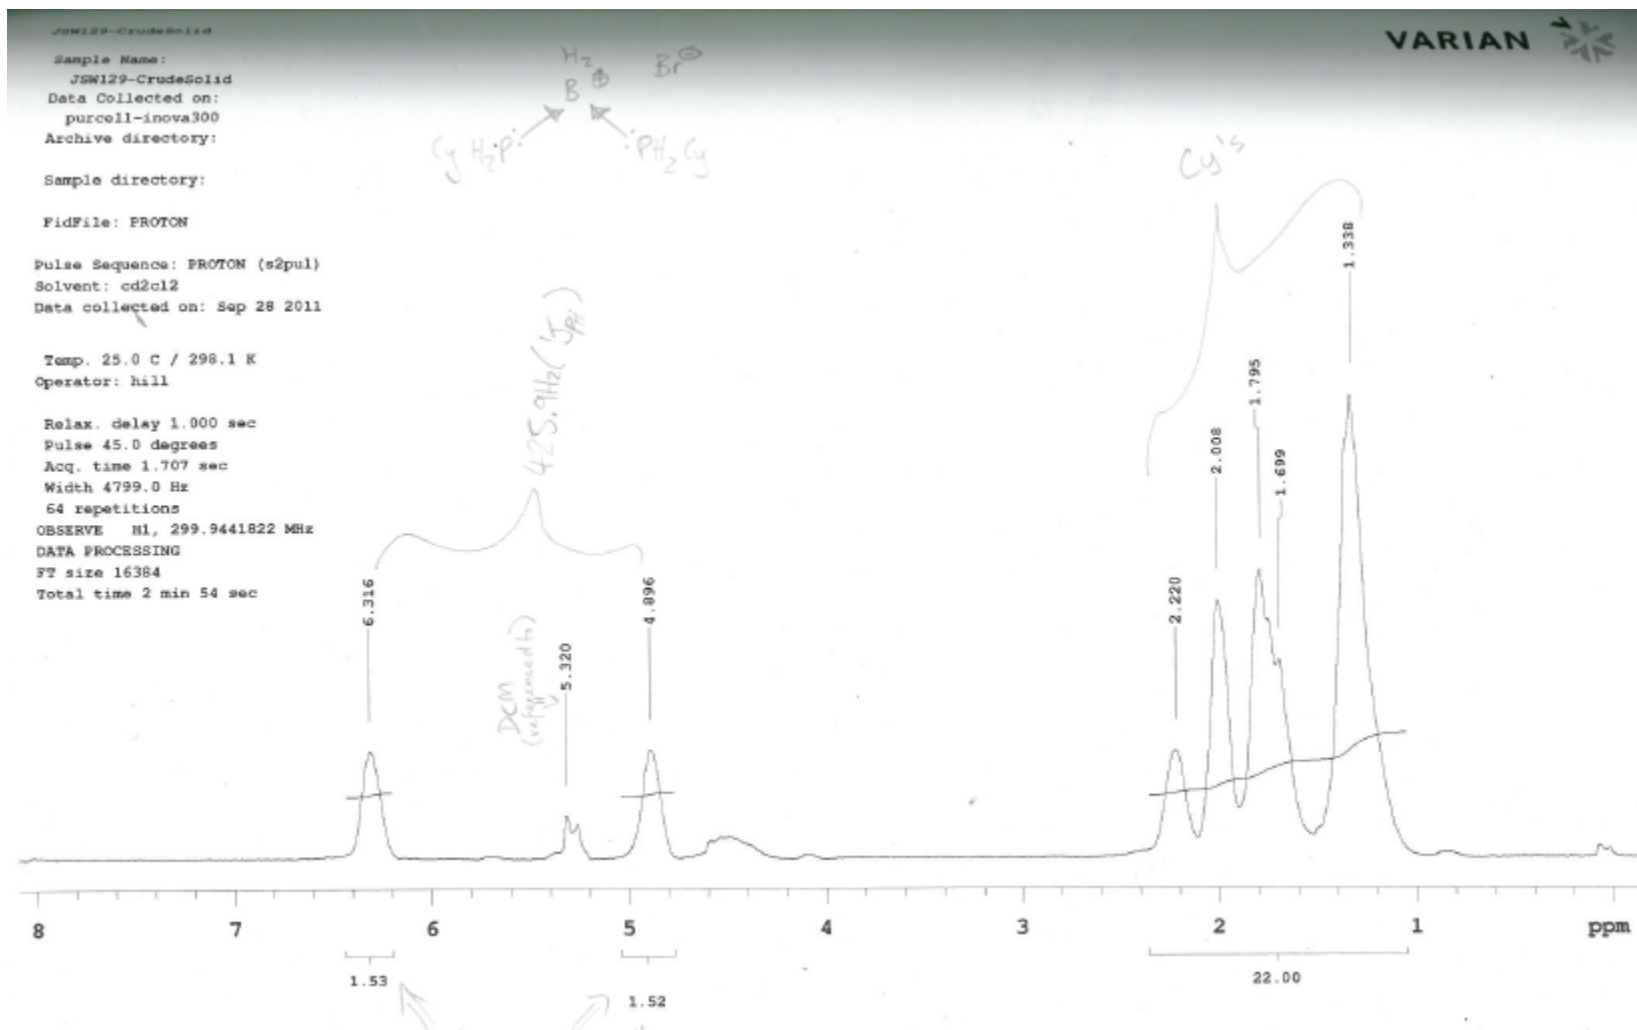

Compound 3 –  $^1\text{H}$  NMR spectrum

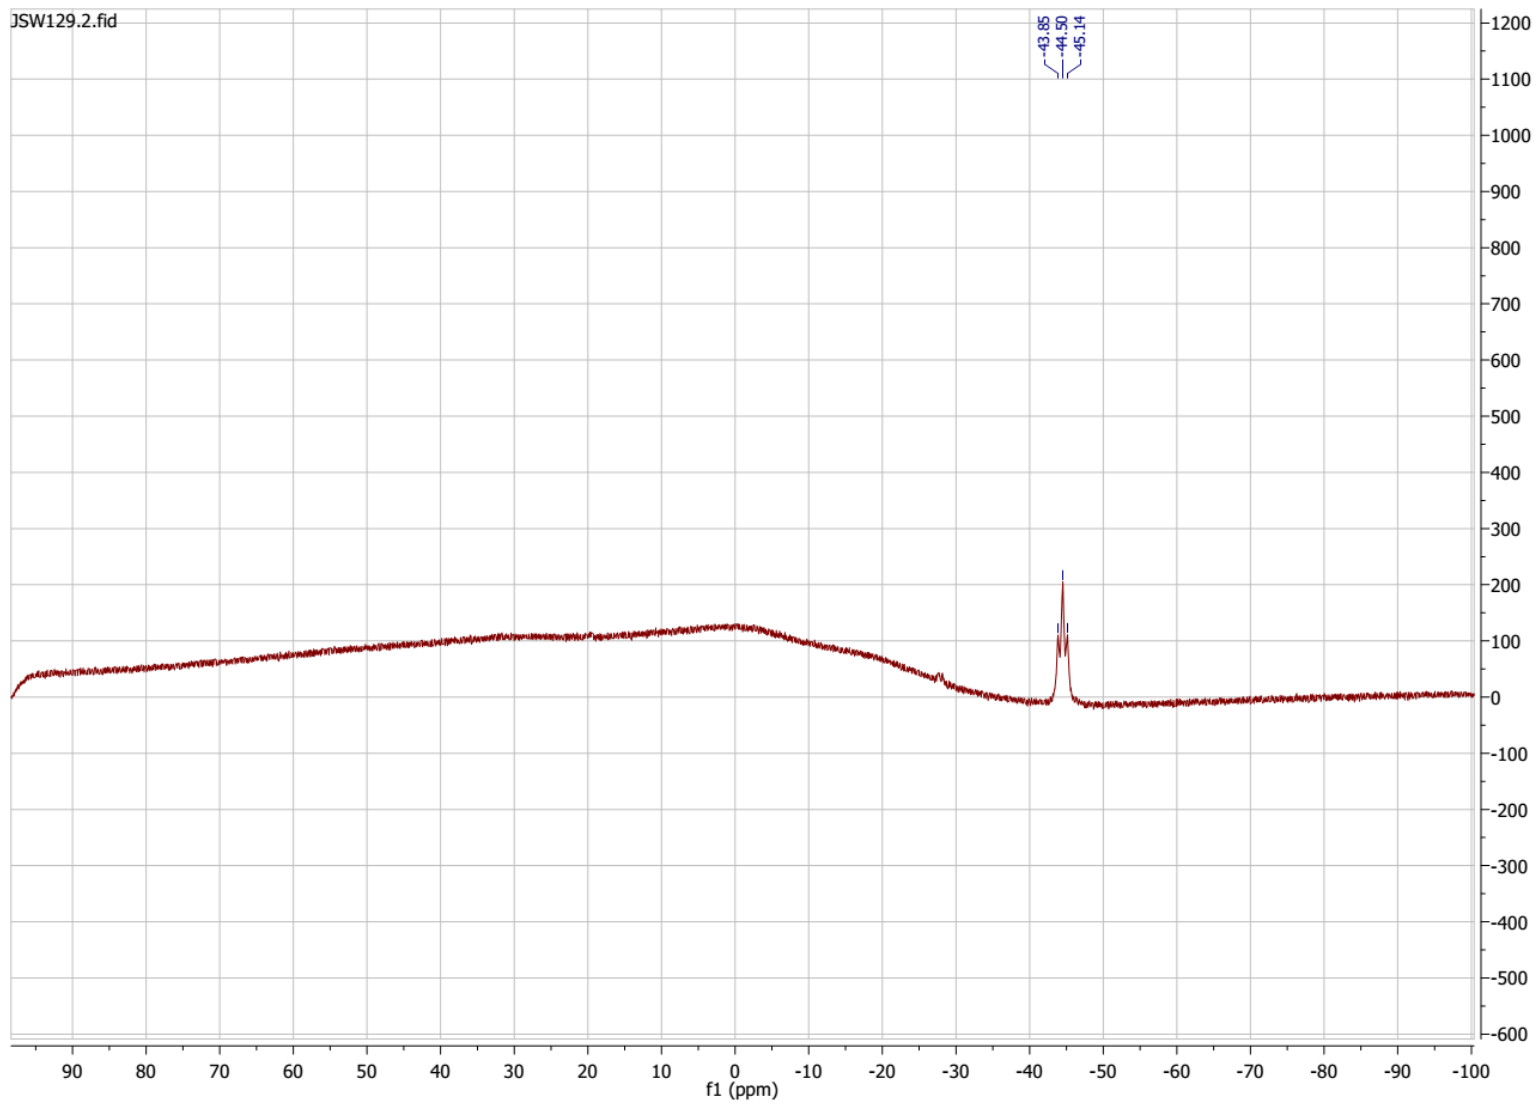

Compound 3 –  $^{11}\text{B}\{^1\text{H}\}$  NMR spectrum

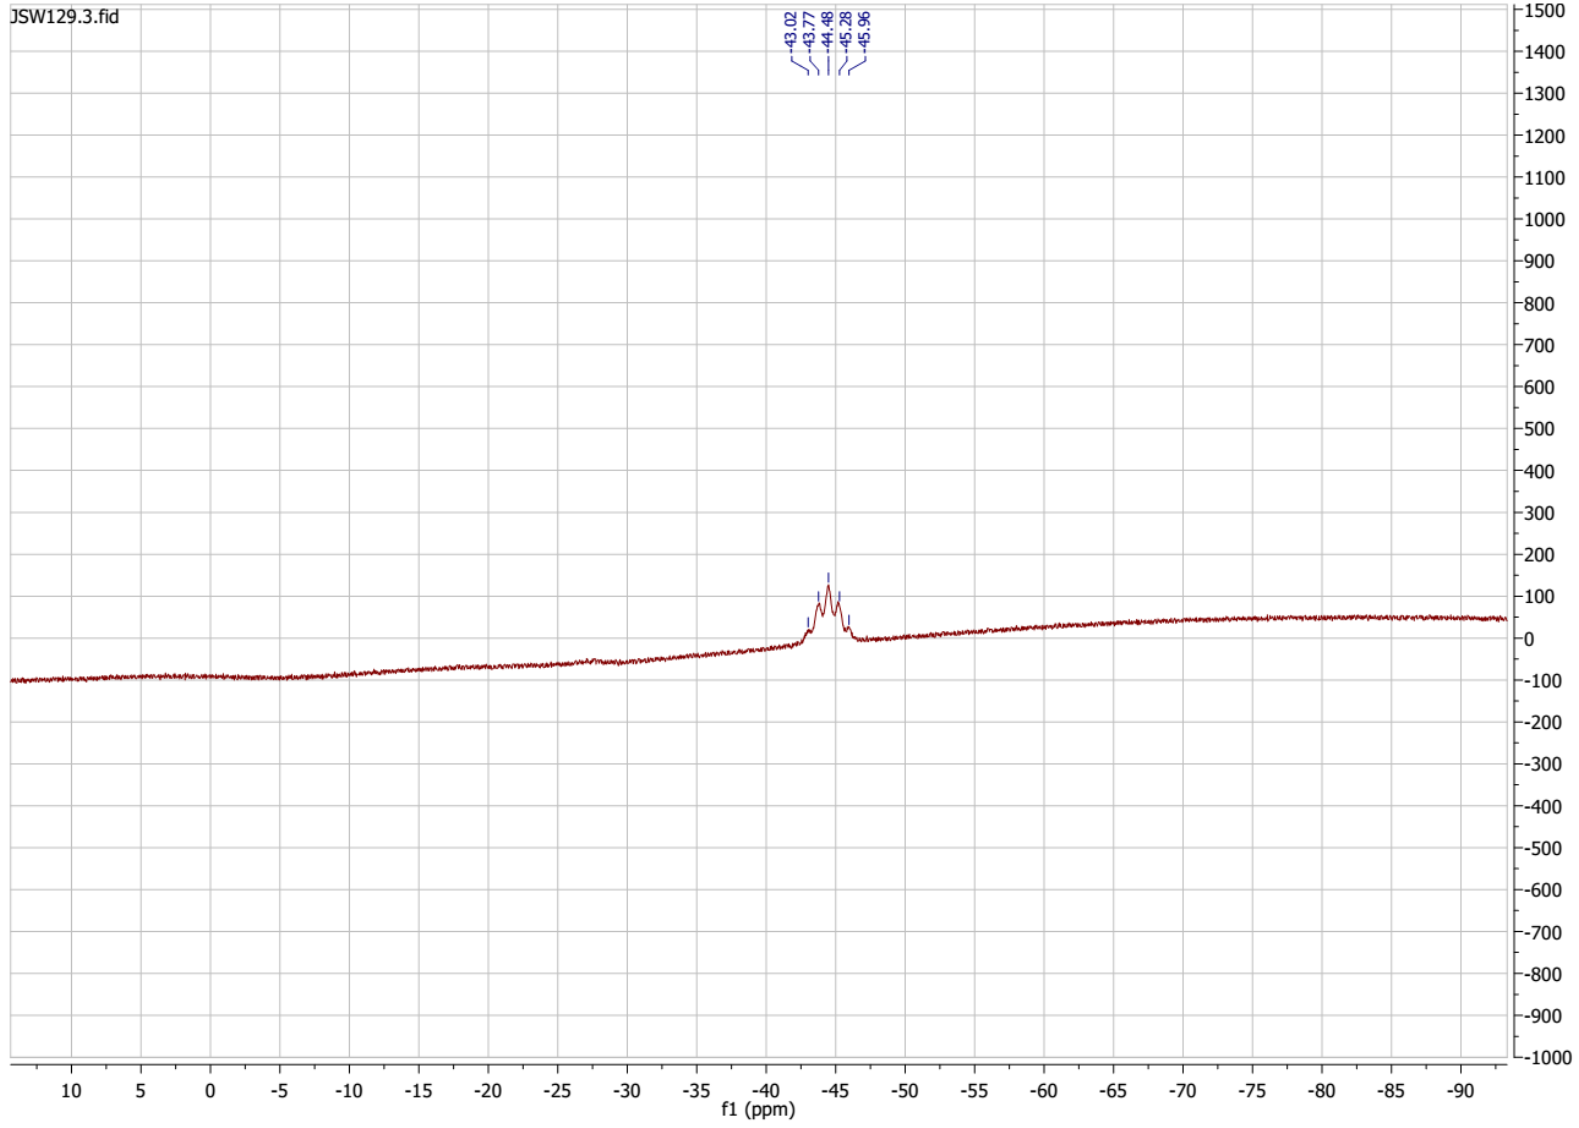

Compound 3 –  $^{11}\text{B}$  NMR spectrum



J5W129-Pure

Sample Name:  
J5W129-Pure  
Data Collected on:  
purcell-inova300  
Archive directory:

Sample directory:  
MS-Exp-79  
FidFile: CARBON

Pulse Sequence: CARBON (s2pul)  
Solvent: cd2cl2  
Data collected on: Dec 11 2011

Temp. 25.0 C / 298.1 K  
Operator: hill

Relax. delay 5.000 sec  
Pulse 45.0 degrees  
Acq. time 0.790 sec  
Width 20741.5 Hz  
752 repetitions  
OBSERVE C13, 75.4209922 MHz  
DECOUPLE H1, 299.9456701 MHz  
Power 41 dB  
continuously on  
WALTZ-16 modulated  
DATA PROCESSING  
Line broadening 1.0 Hz  
FT size 32768  
Total time 24 hr, 9 min

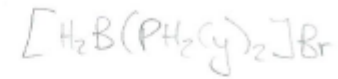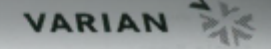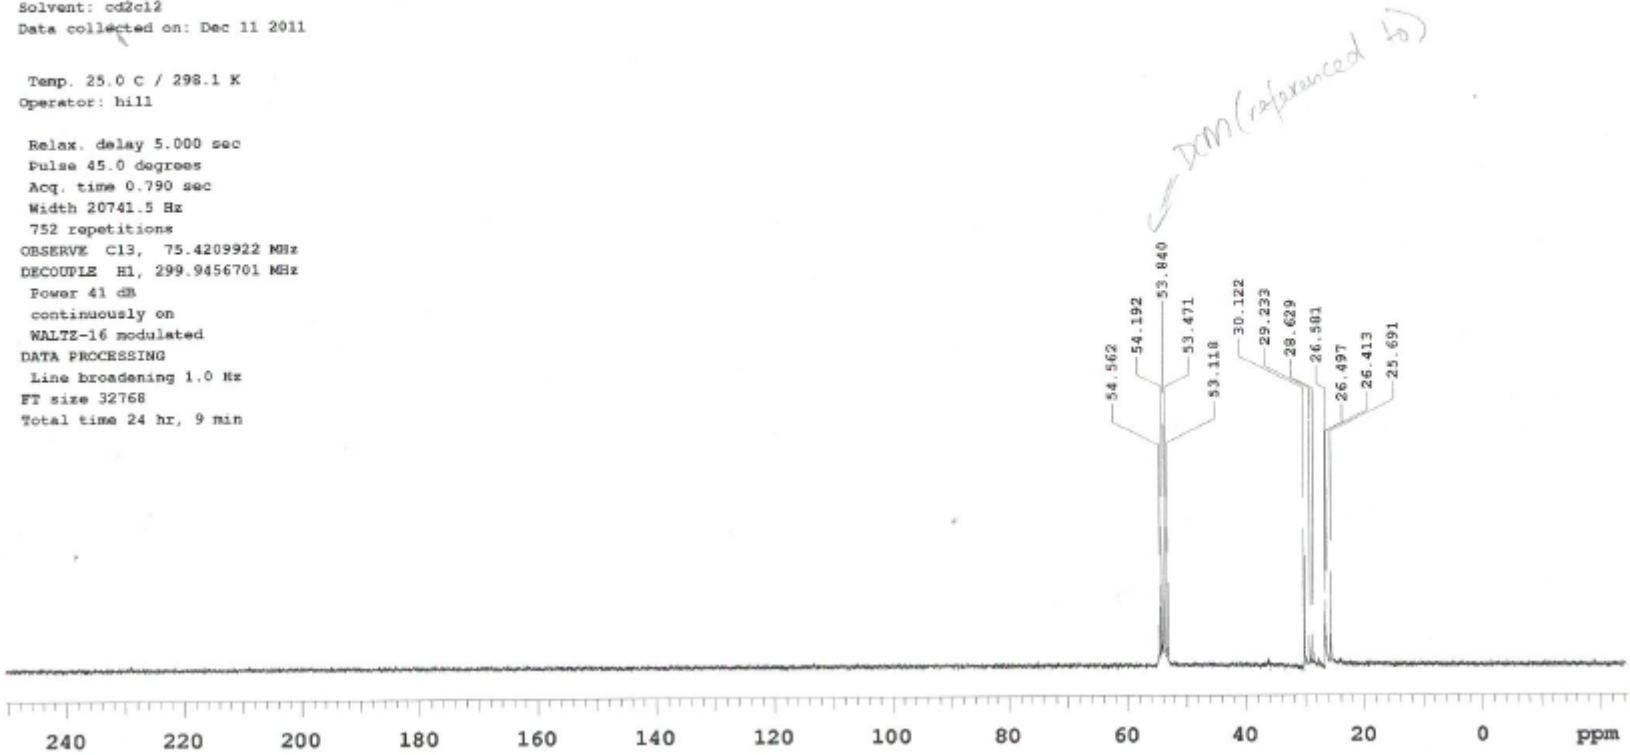

Compound 3 -  $^{13}C\{^1H\}$  NMR spectrum

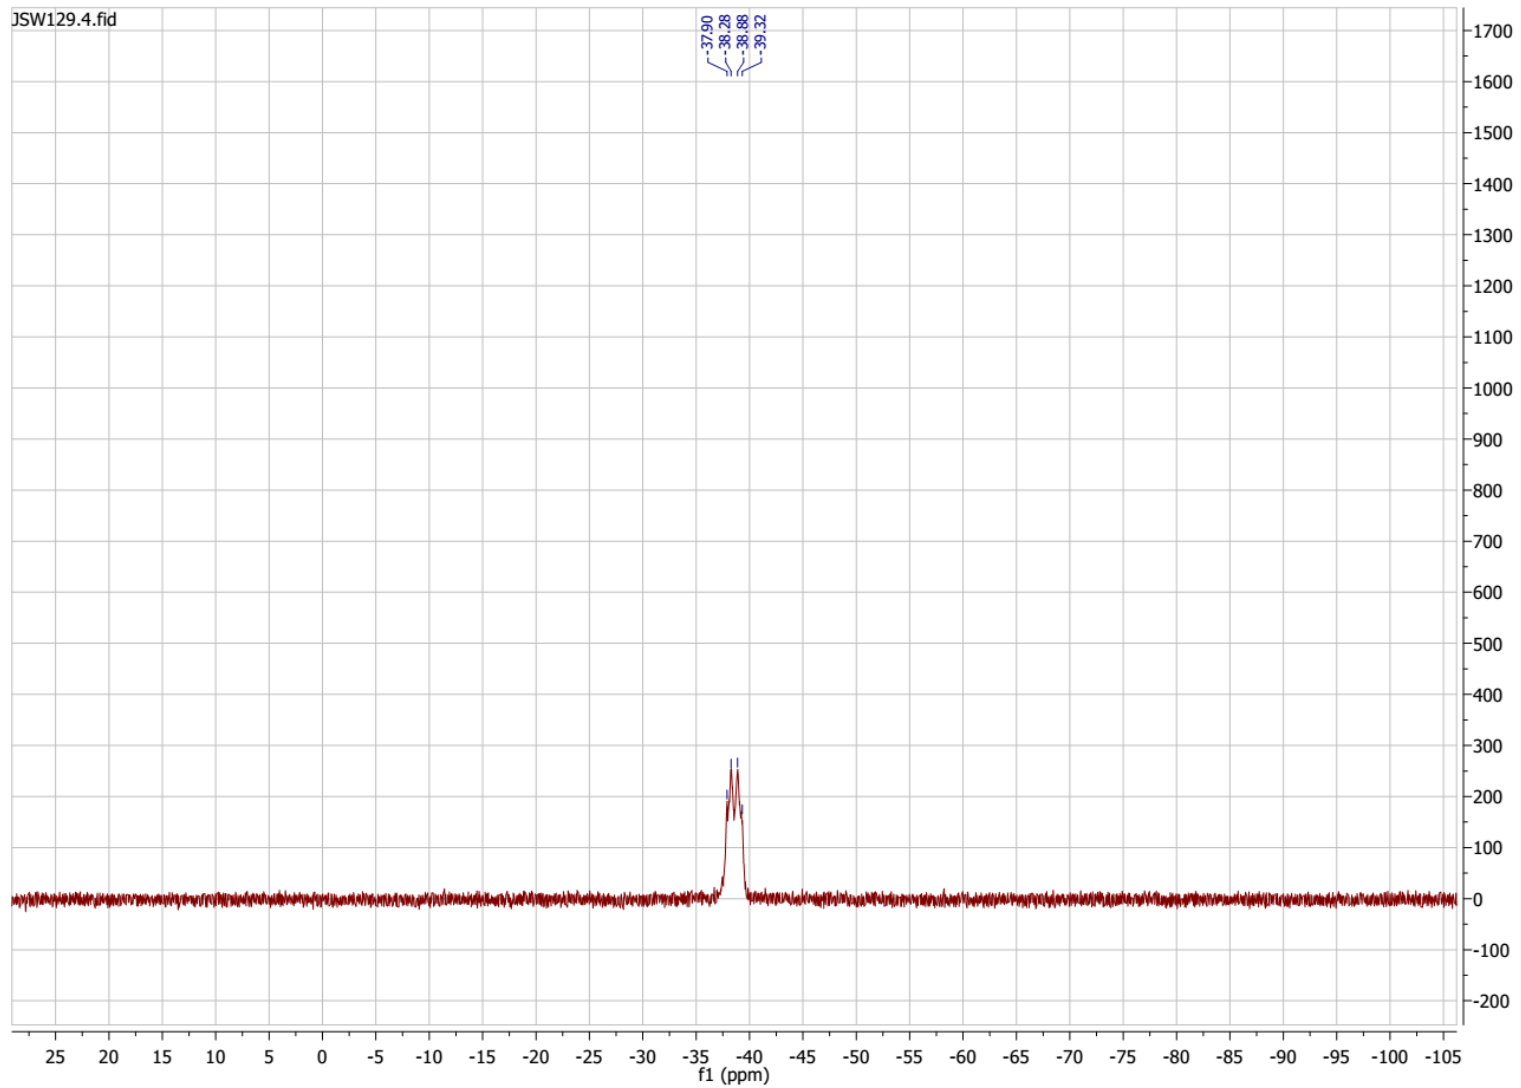

Compound 3 –  $^{31}\text{P}\{^1\text{H}\}$  NMR spectrum

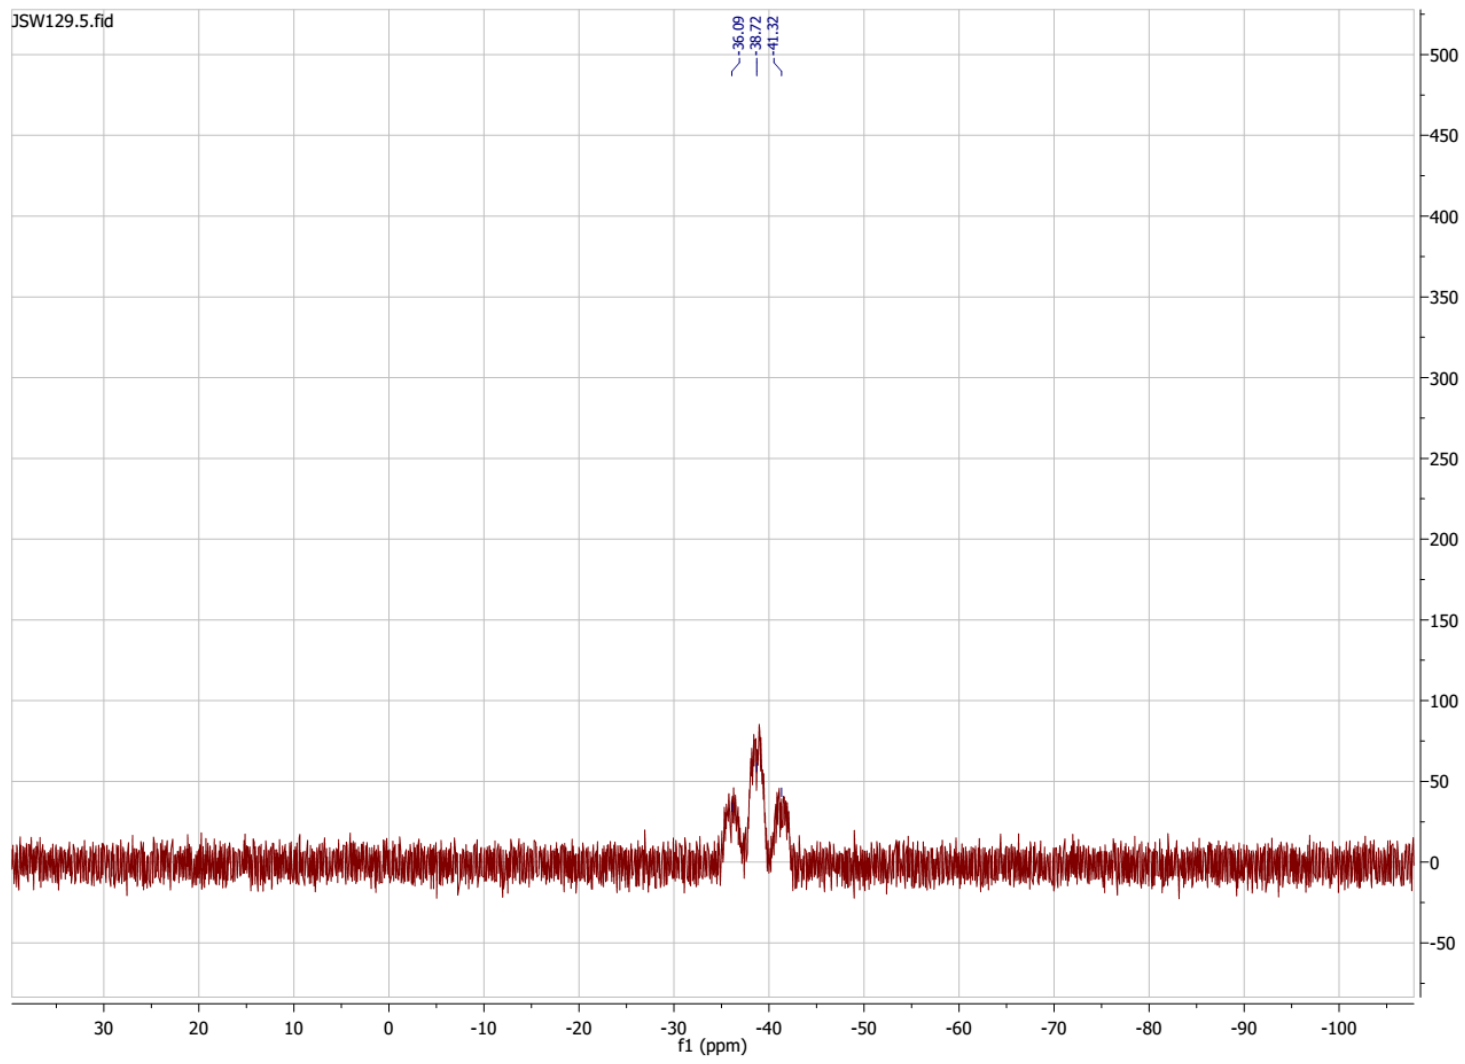

Compound 3 – <sup>31</sup>P NMR spectrum

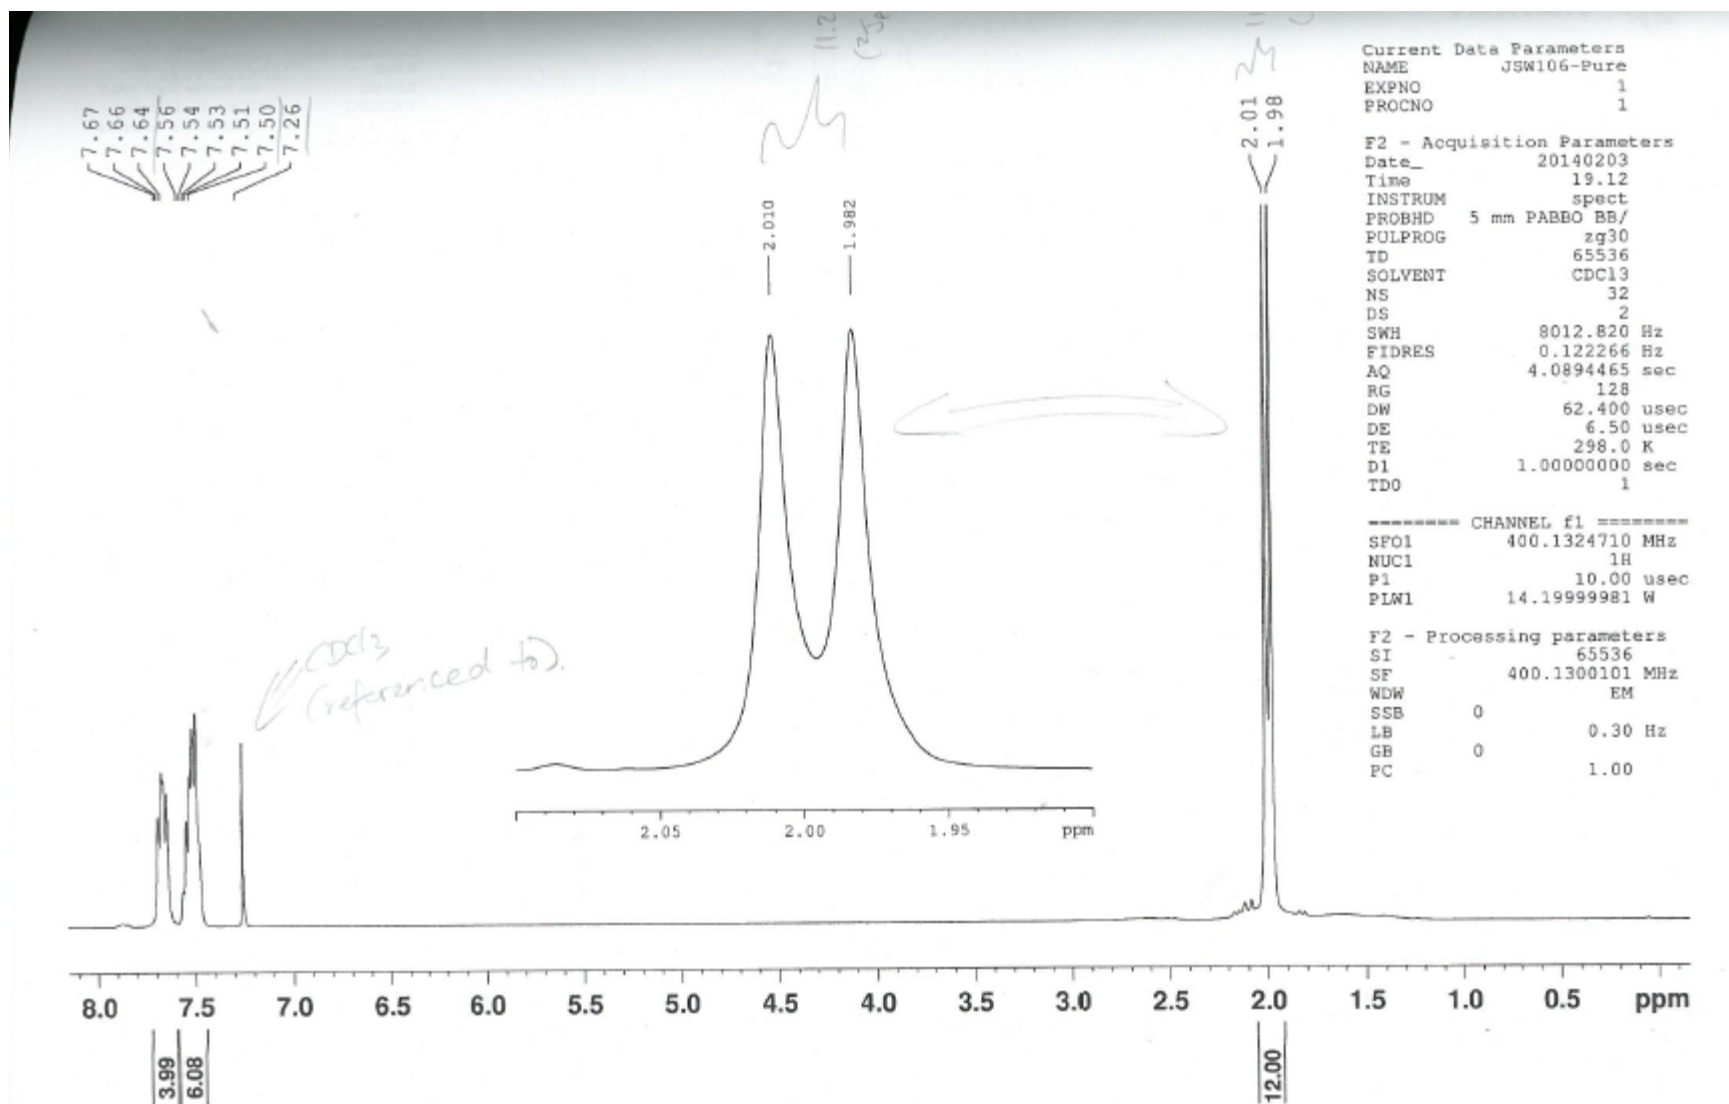

Compound 4 - <sup>1</sup>H NMR spectrum

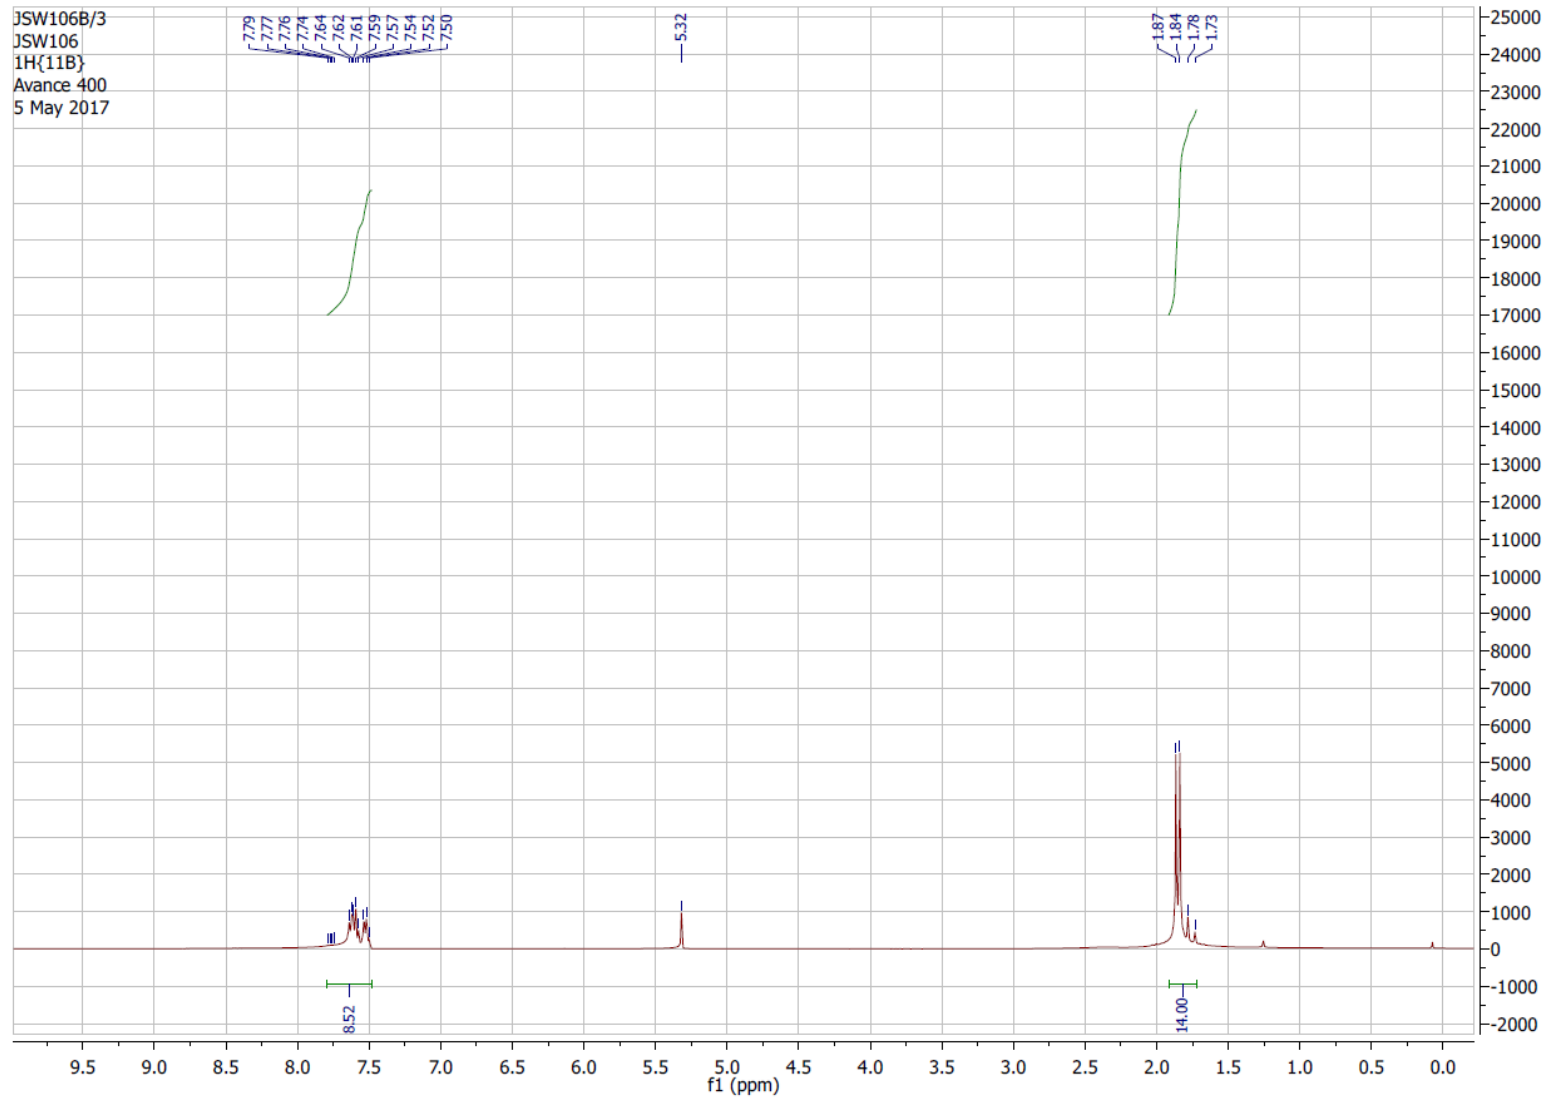

Compound 4 –  $^1\text{H}\{^{11}\text{B}\}$  NMR spectrum

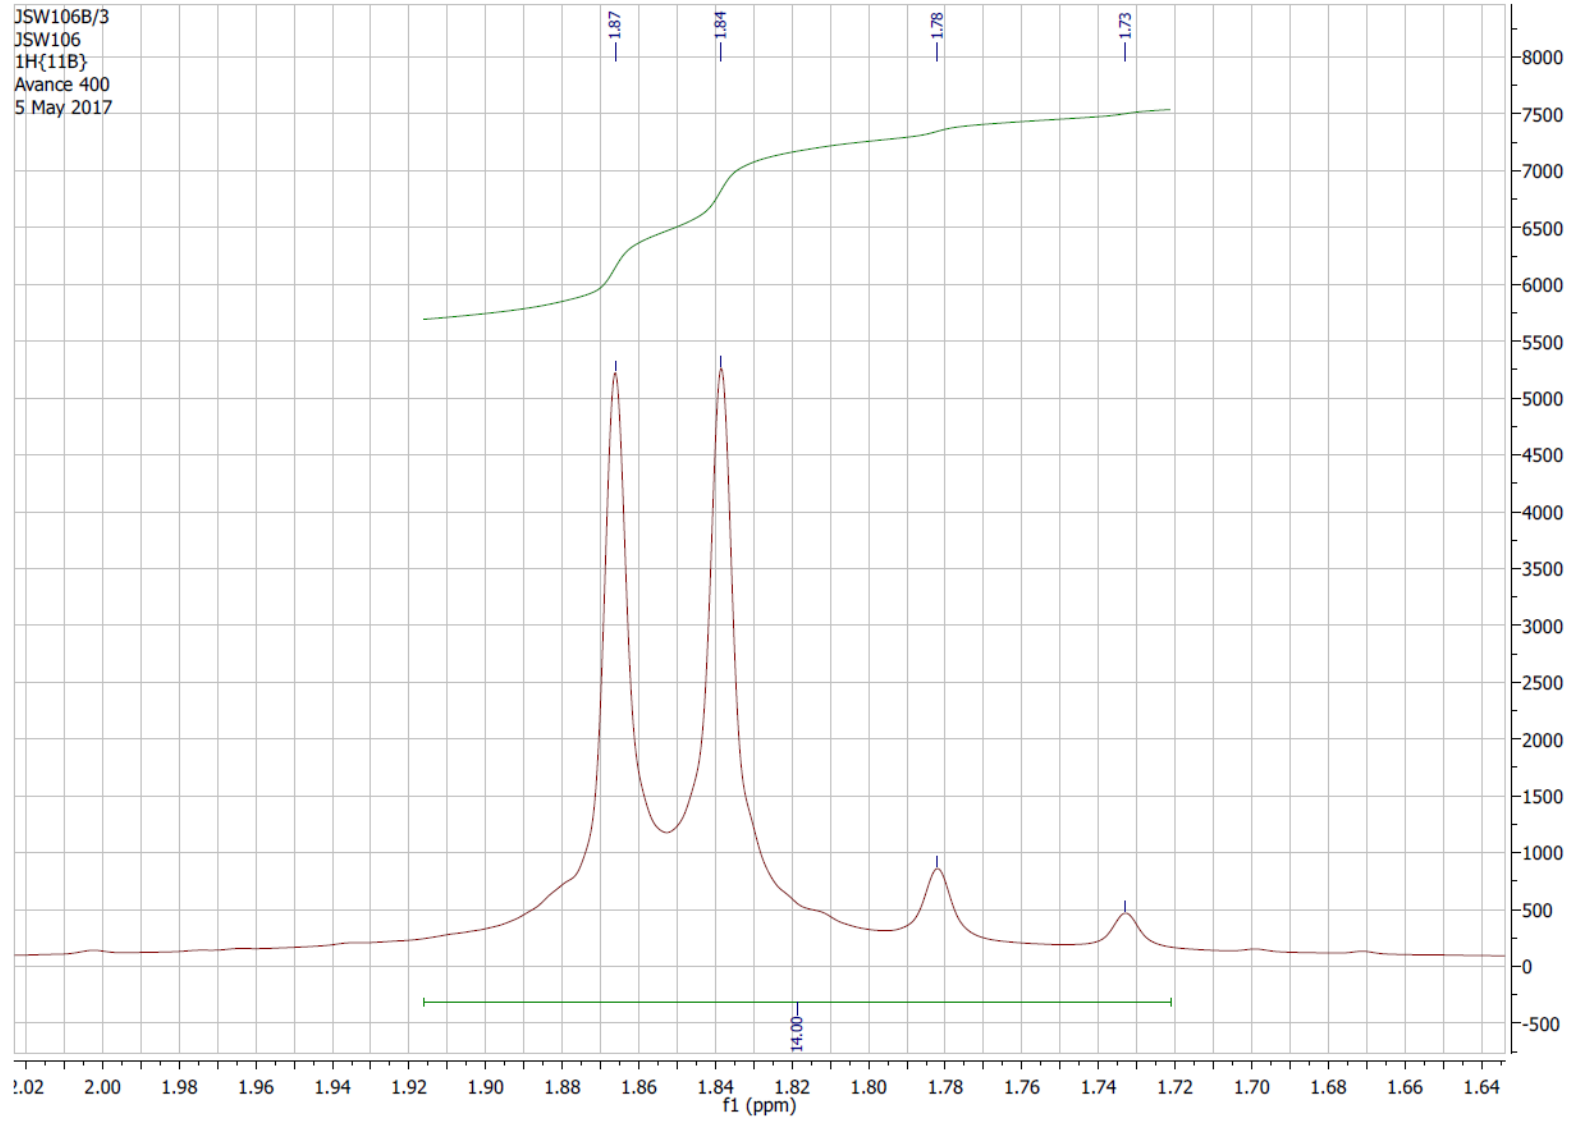

Compound 4 –  $^1\text{H}\{^{11}\text{B}\}$  NMR spectrum (Expansion of  $\text{BH}_2$  resonance)

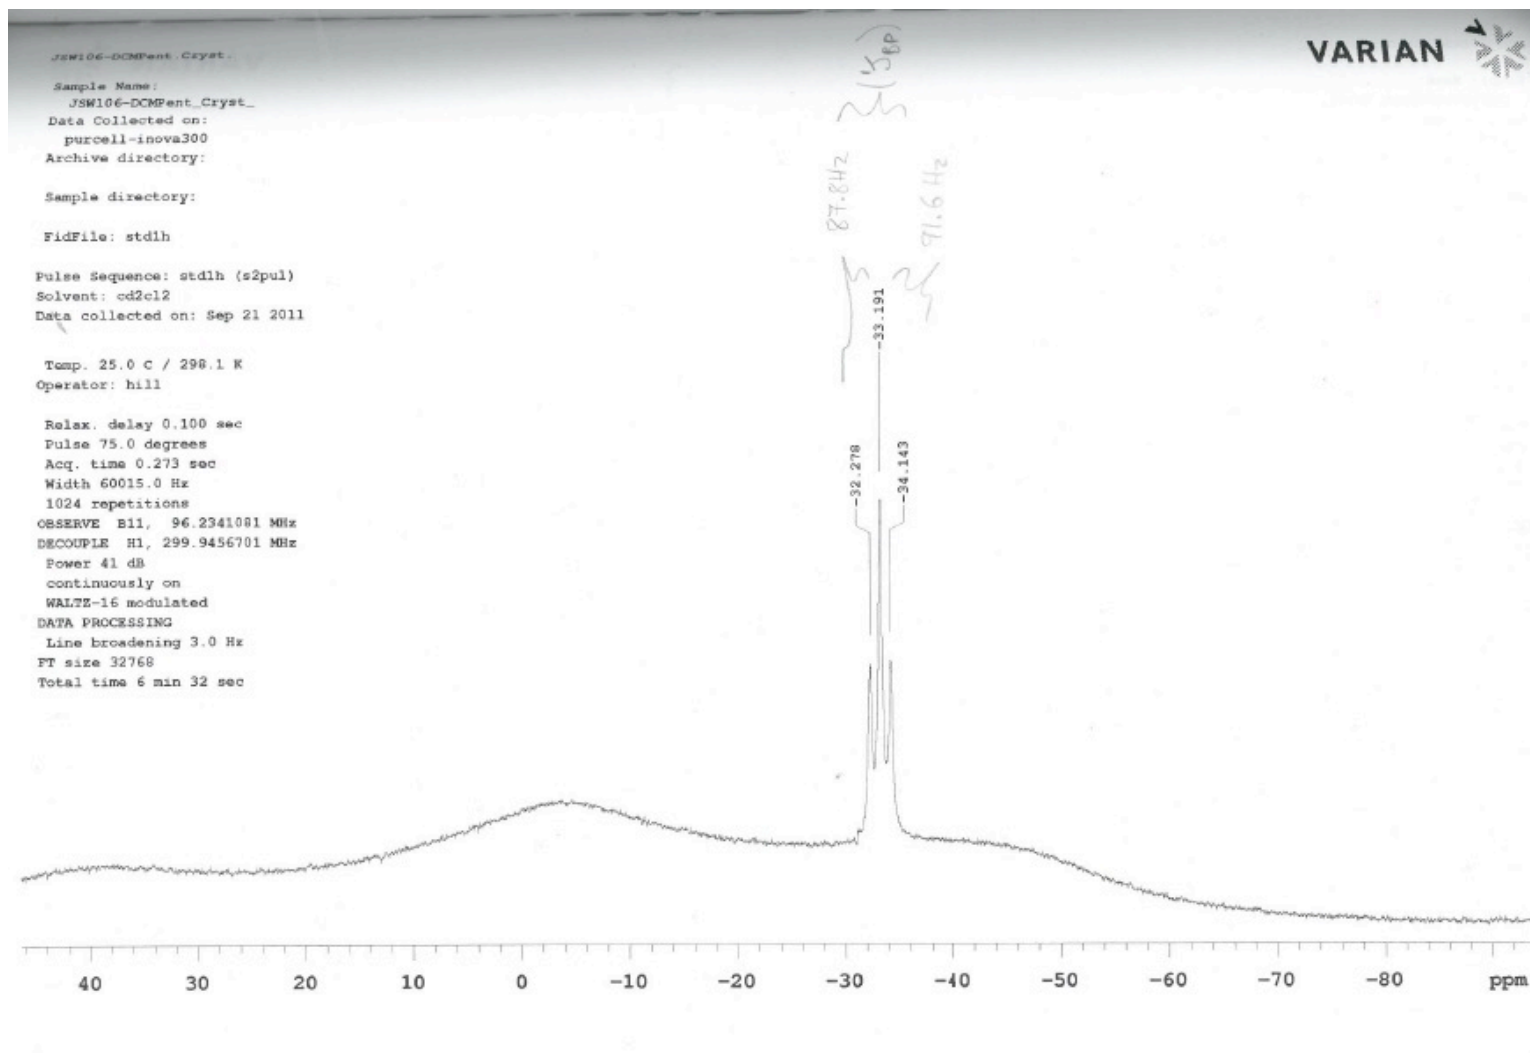

Compound 4 –  $^{11}\text{B}\{^1\text{H}\}$  NMR spectrum

JSM106-DCMParnt\_Cryst\_

Sample Name:  
JSM106-DCMParnt\_Cryst\_

Data Collected on:  
purcell-inova300

Archive directory:

Sample directory:

FidFile: stdlh

Pulse Sequence: stdlh (s2pul)

Solvent: cd2cl2

Data collected on: Sep 21 2011

Temp. 25.0 C / 298.1 K

Operator: hill

Relax. delay 0.100 sec

Pulse 75.0 degrees

Acq. time 0.273 sec

Width 60015.0 Hz

1024 repetitions

OBSERVE B11, 96.2341001 MHz

DATA PROCESSING

Line broadening 3.0 Hz

FT size 32768

Total time 6 min 32 sec

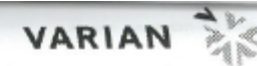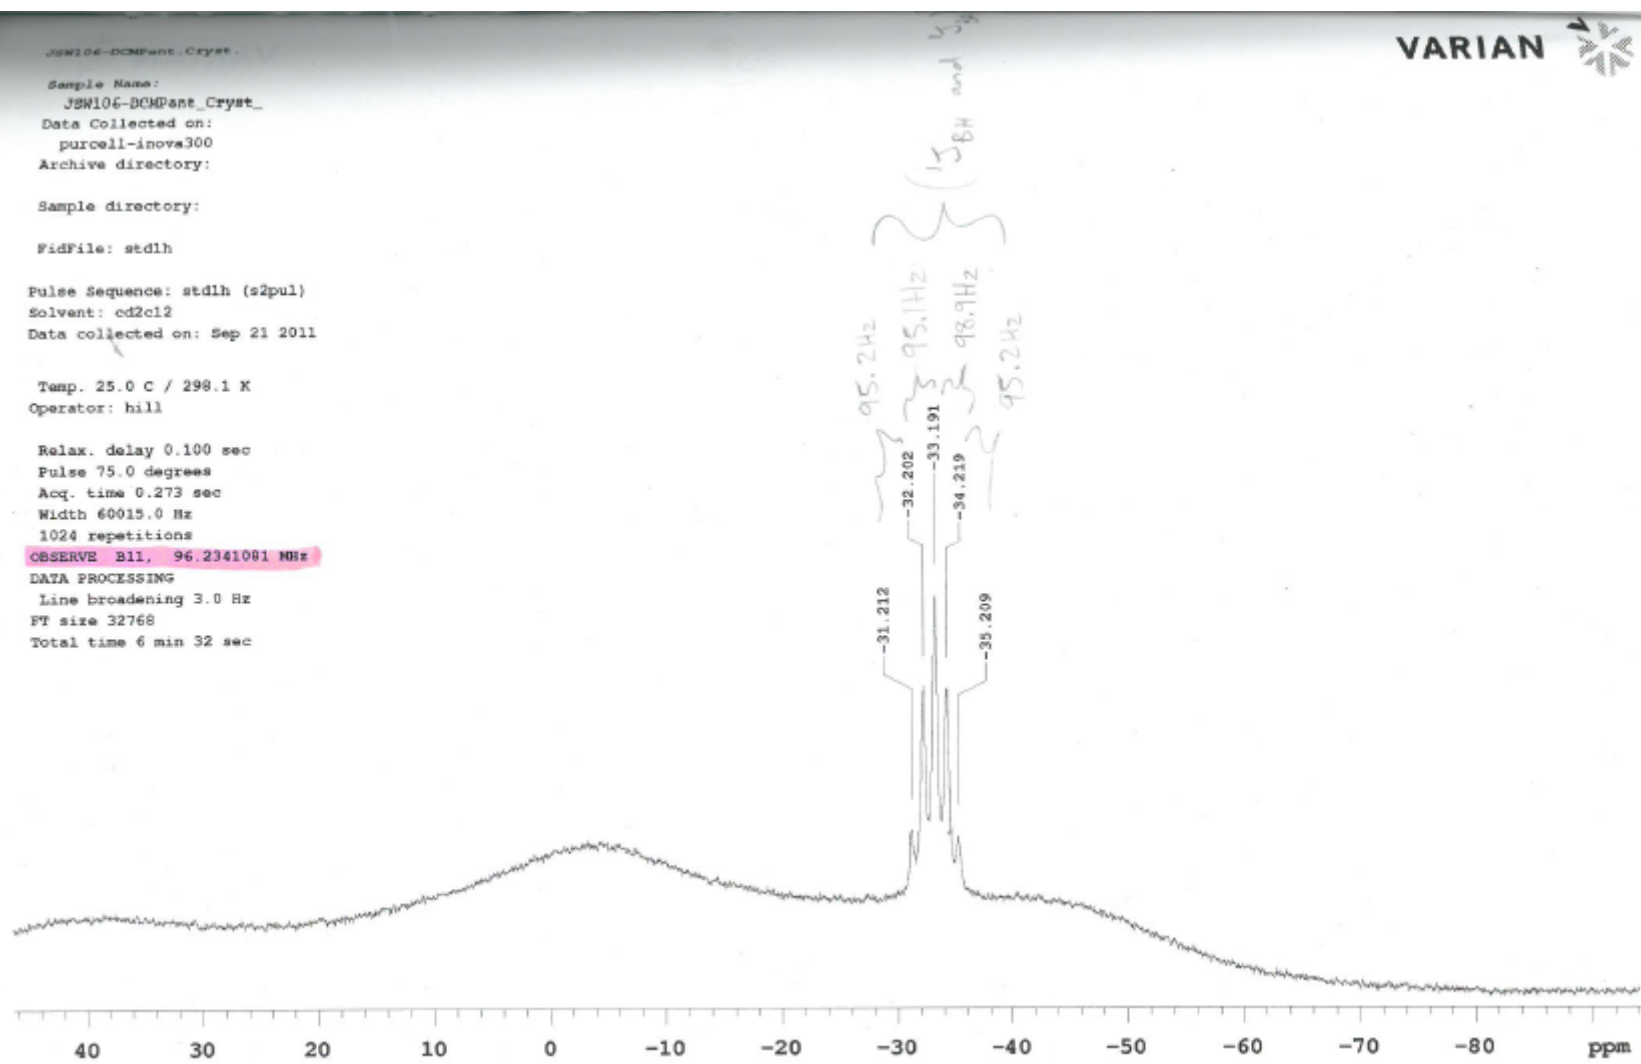

Compound 4 –  $^{11}\text{B}$  NMR spectrum



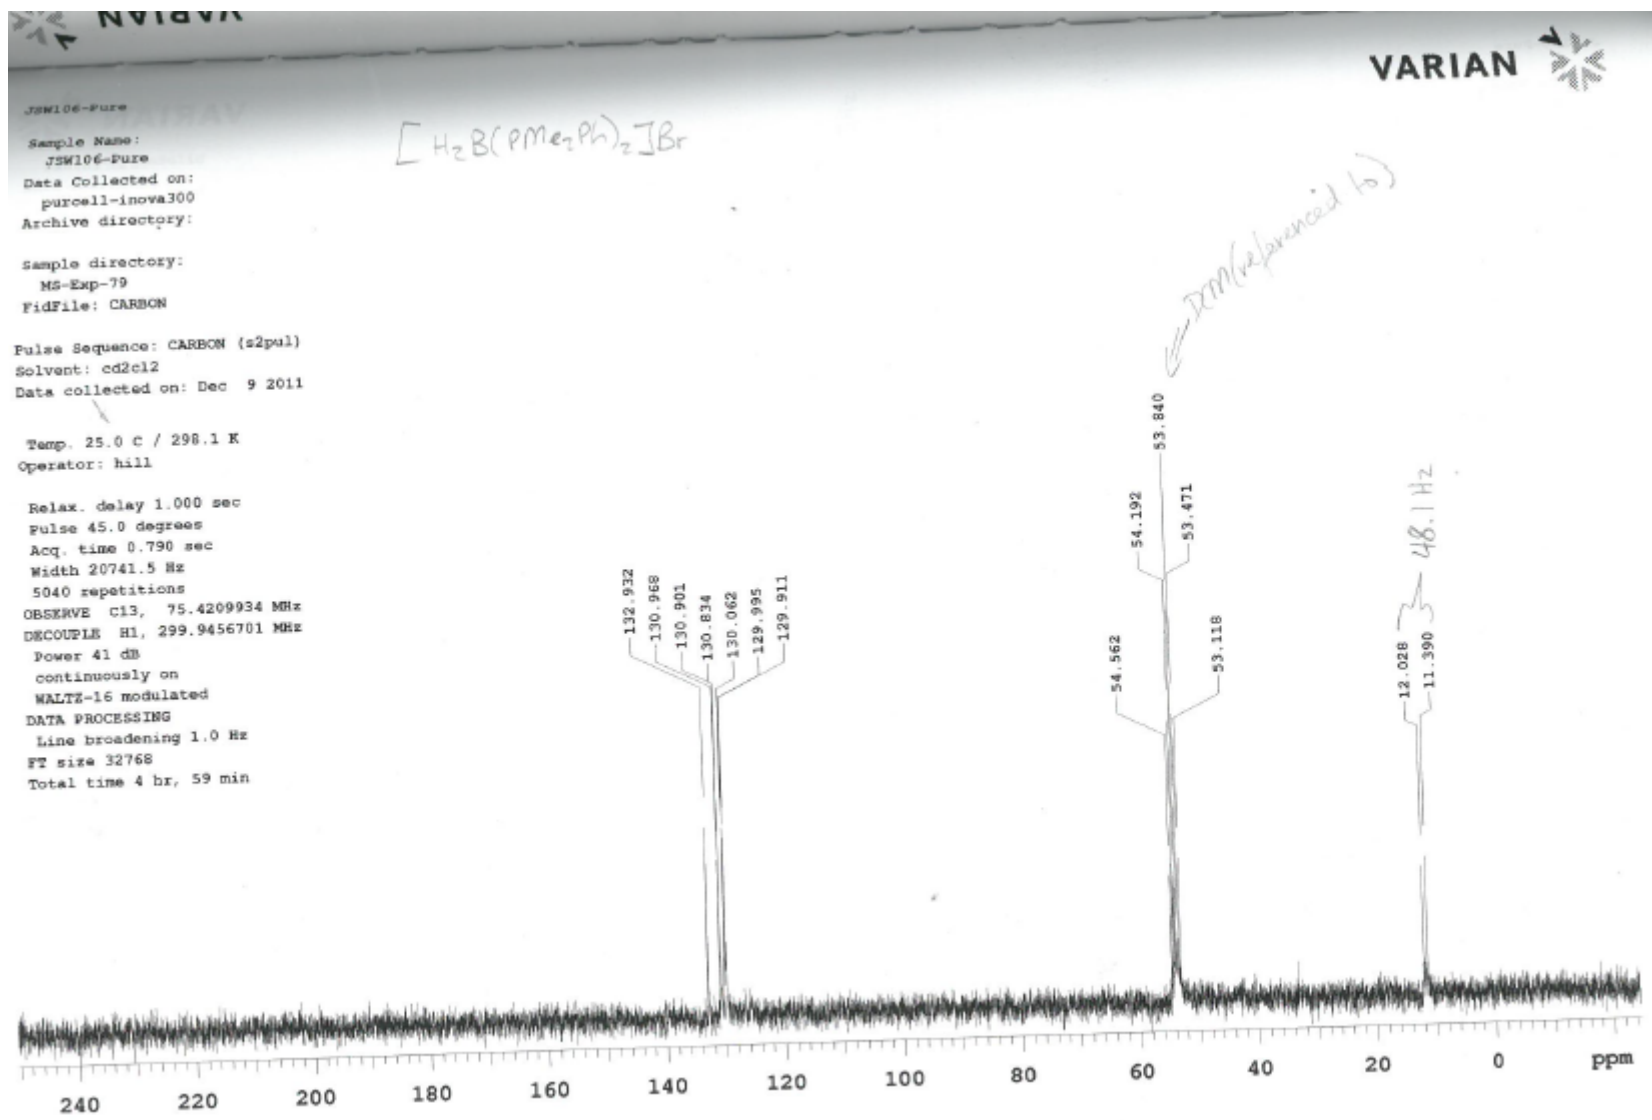

Compound 4 – <sup>13</sup>C{<sup>1</sup>H} NMR spectrum

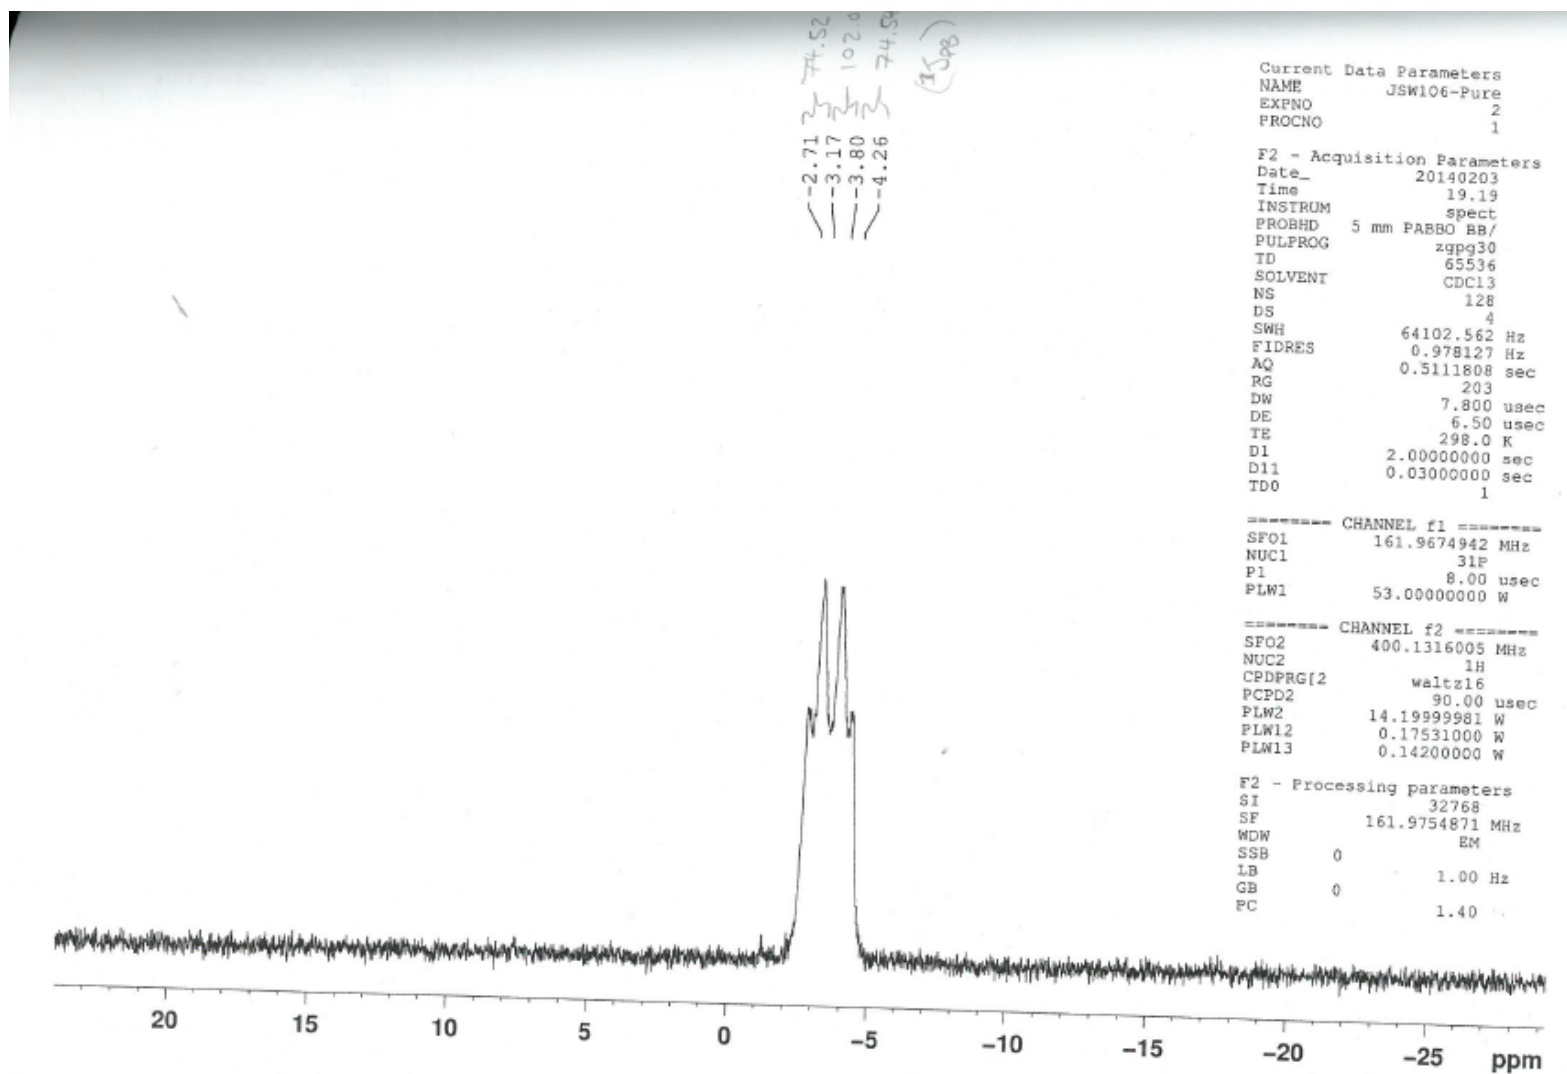

Compound 4 -  $^{31}\text{P}\{^1\text{H}\}$  NMR spectrum

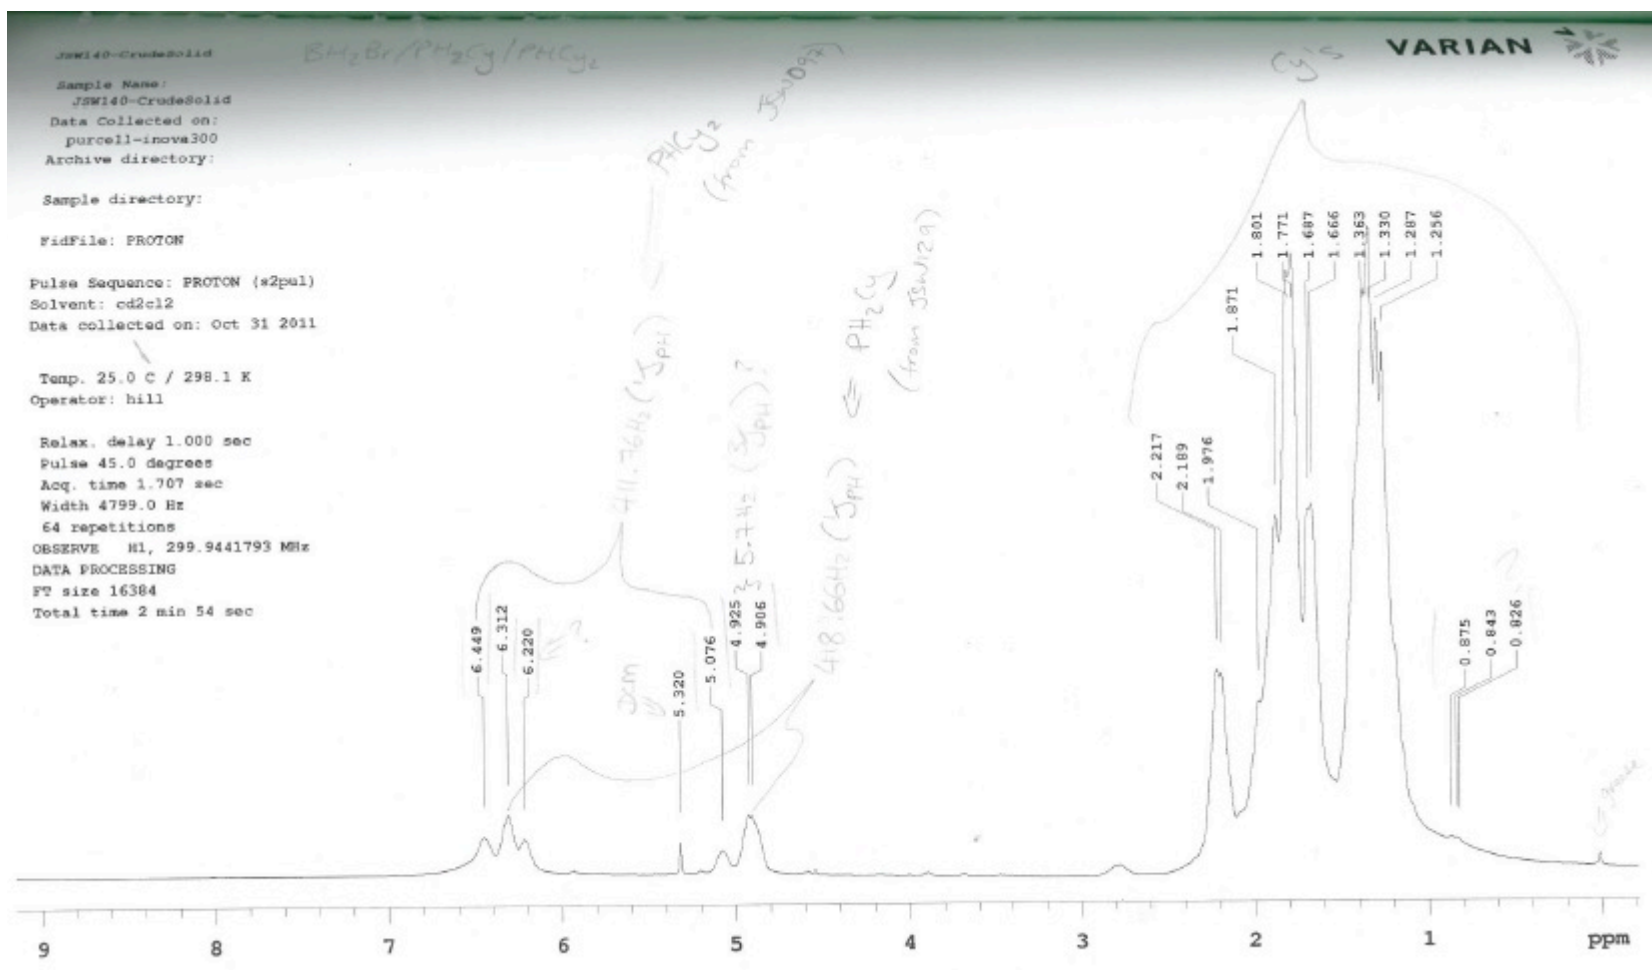

Compound 5 – <sup>1</sup>H NMR spectrum

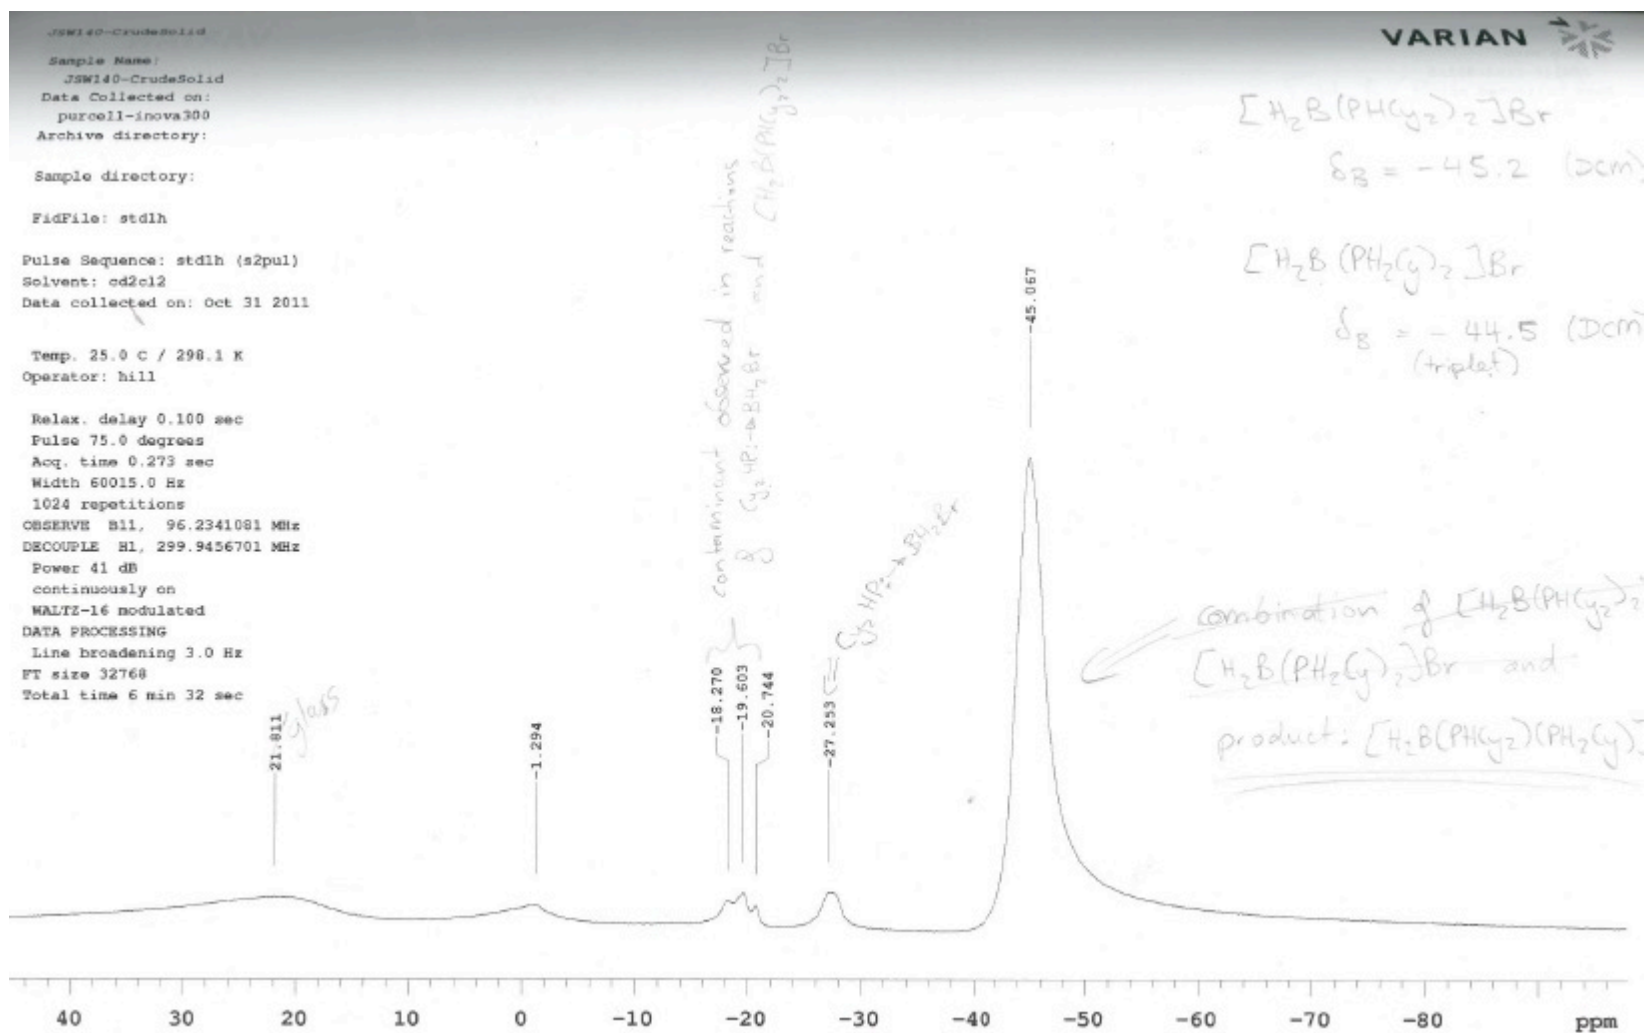

Compound 5 -  $^{11}B\{^1H\}$  NMR spectrum

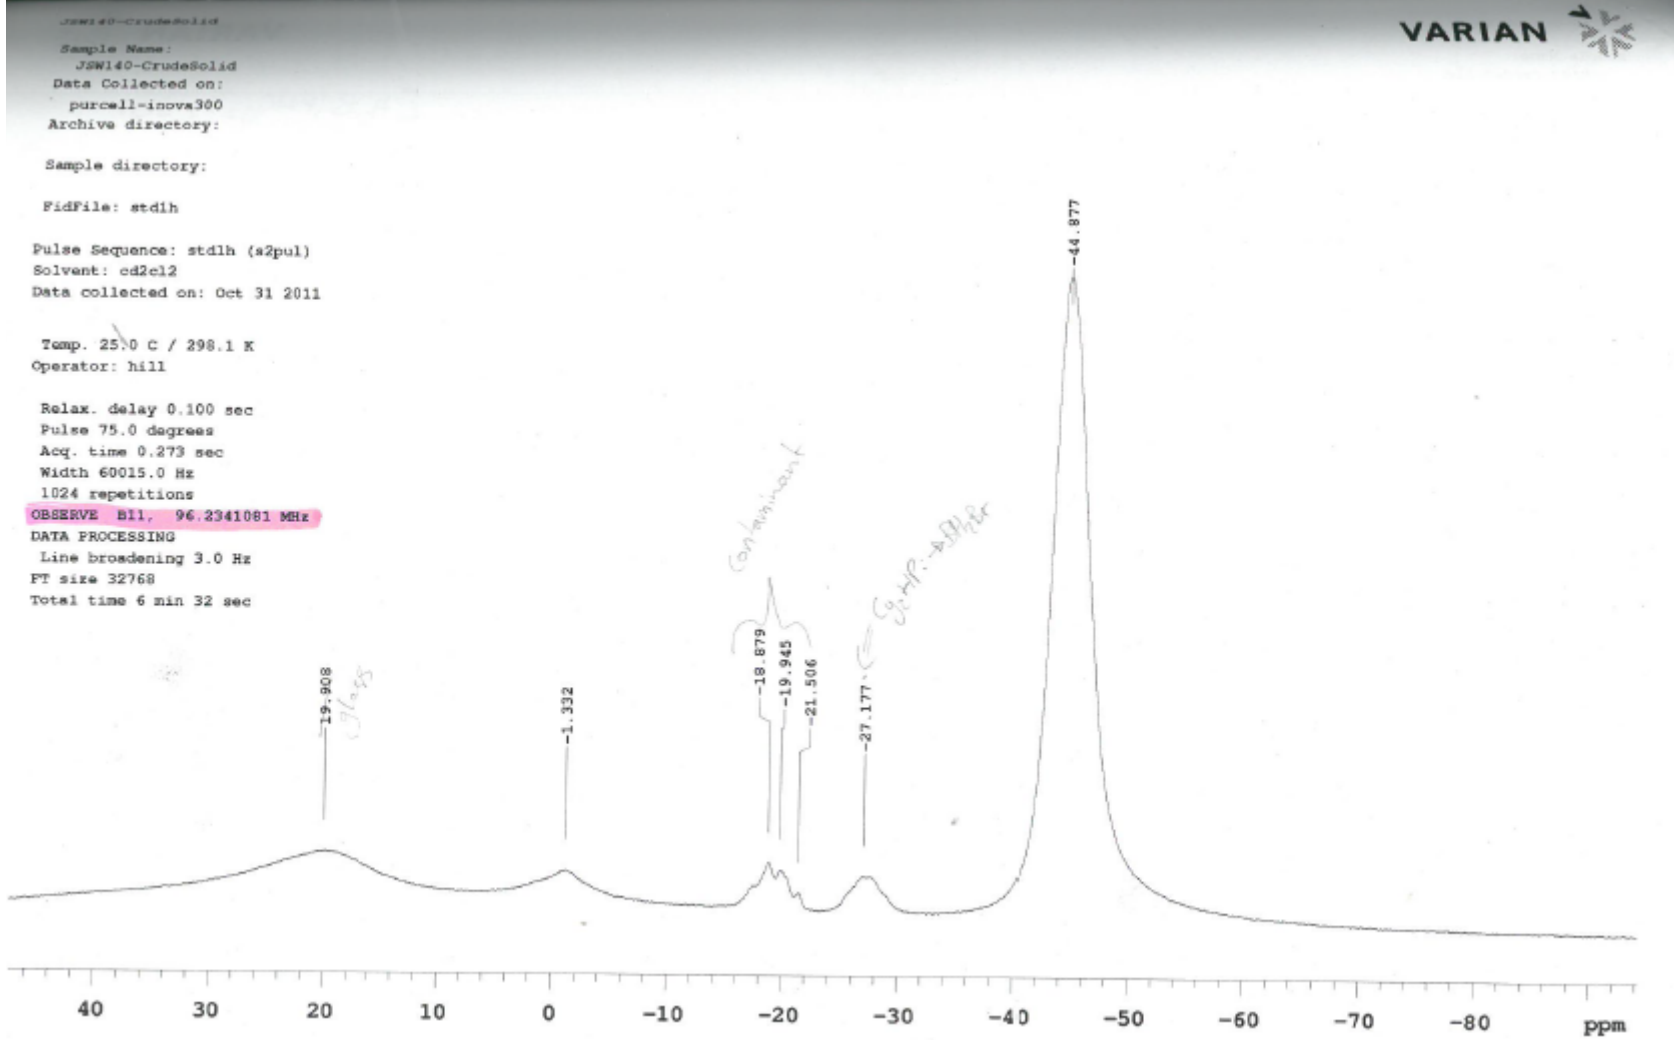

Compound 5 – <sup>11</sup>B NMR spectrum

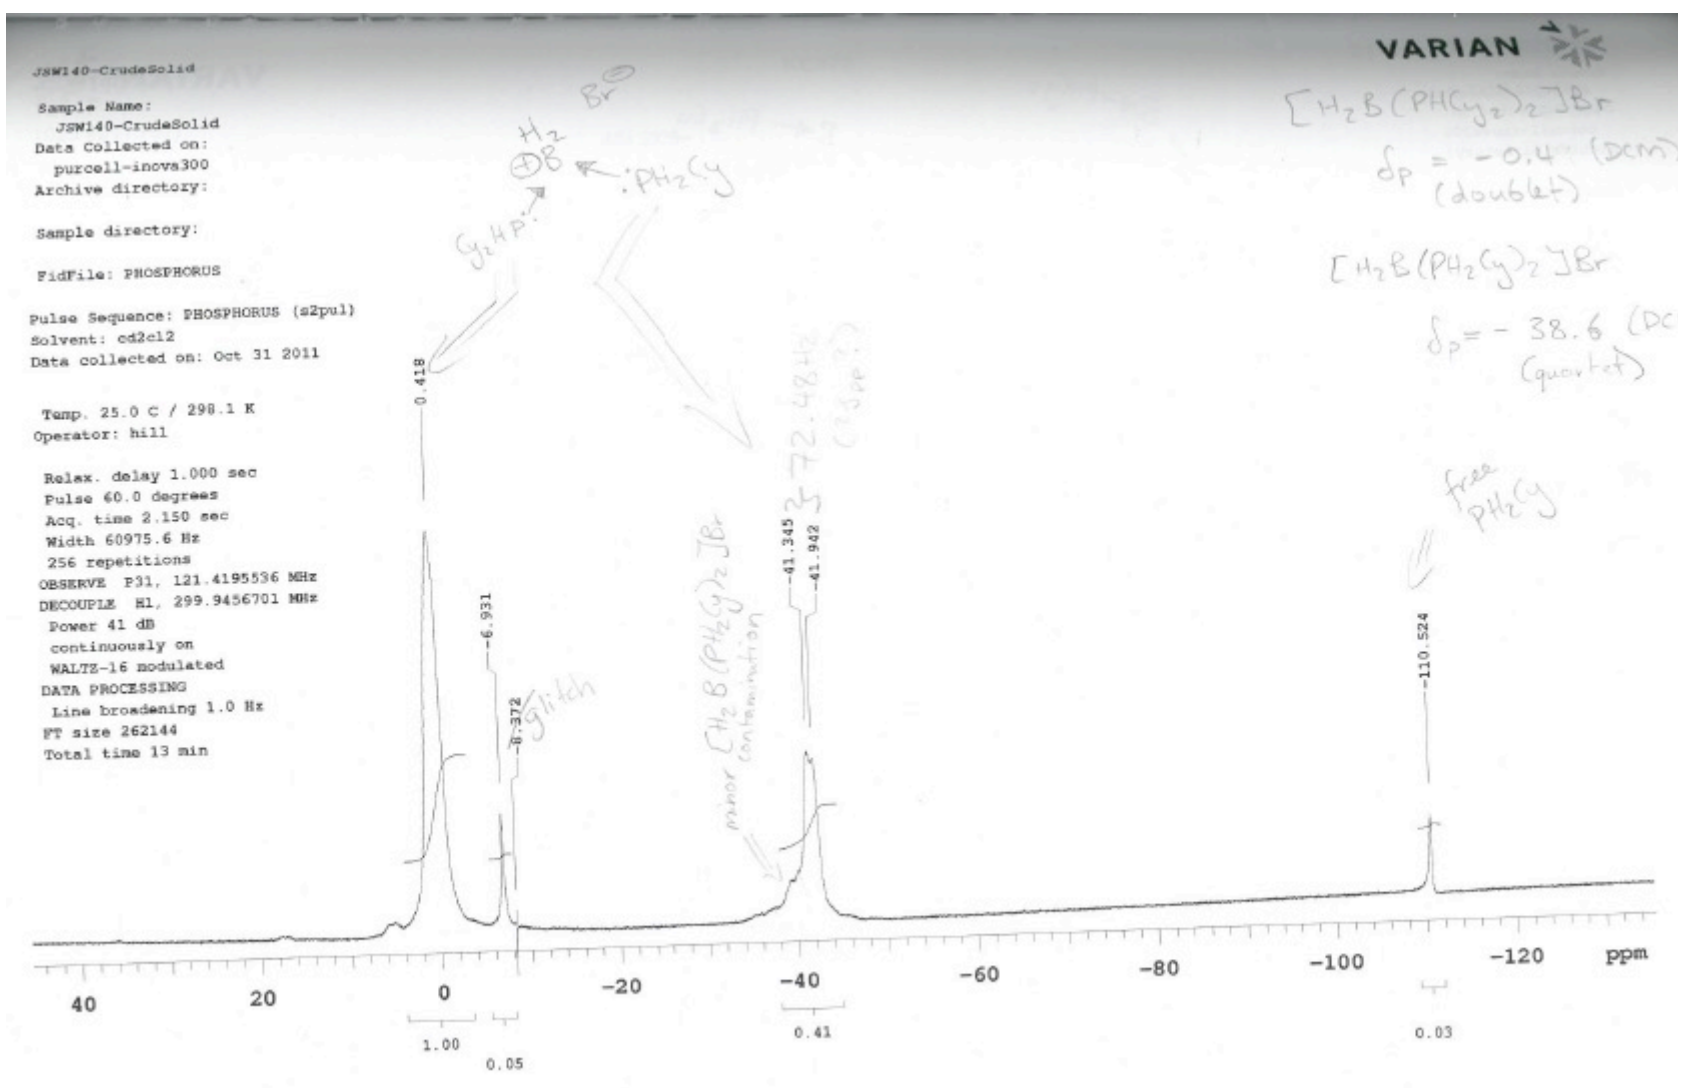

Compound 5 –  $^{31}\text{P}\{^1\text{H}\}$  NMR spectrum

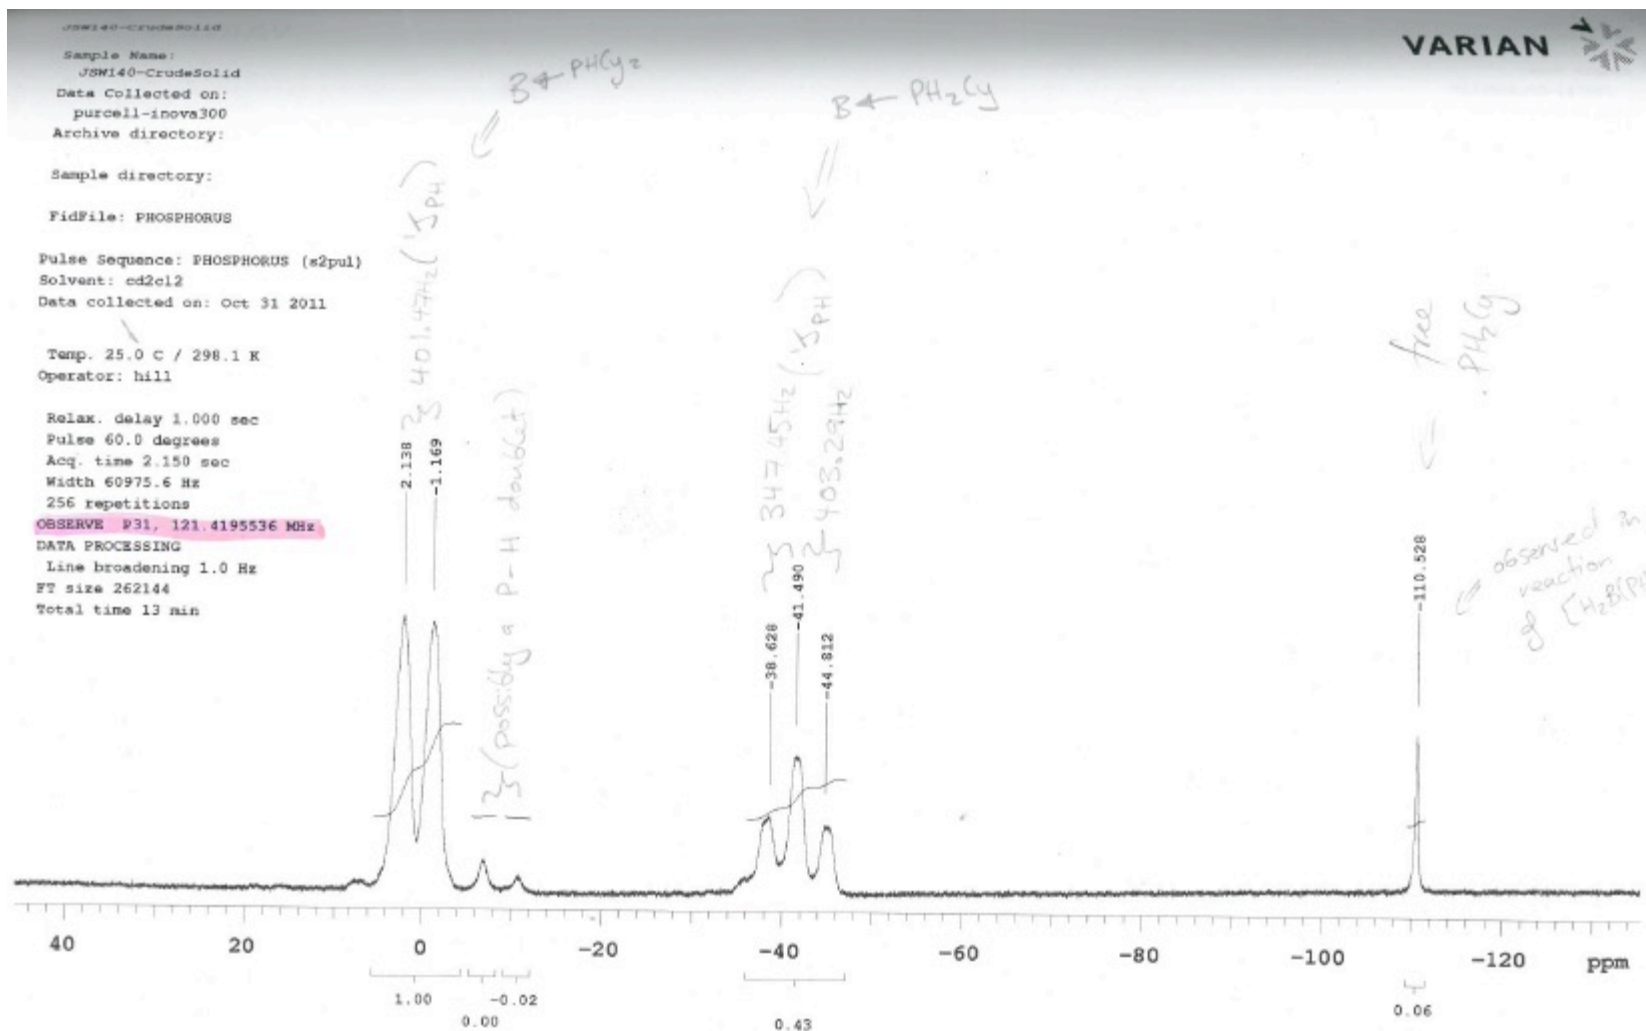

Compound 5 – <sup>31</sup>P NMR spectrum

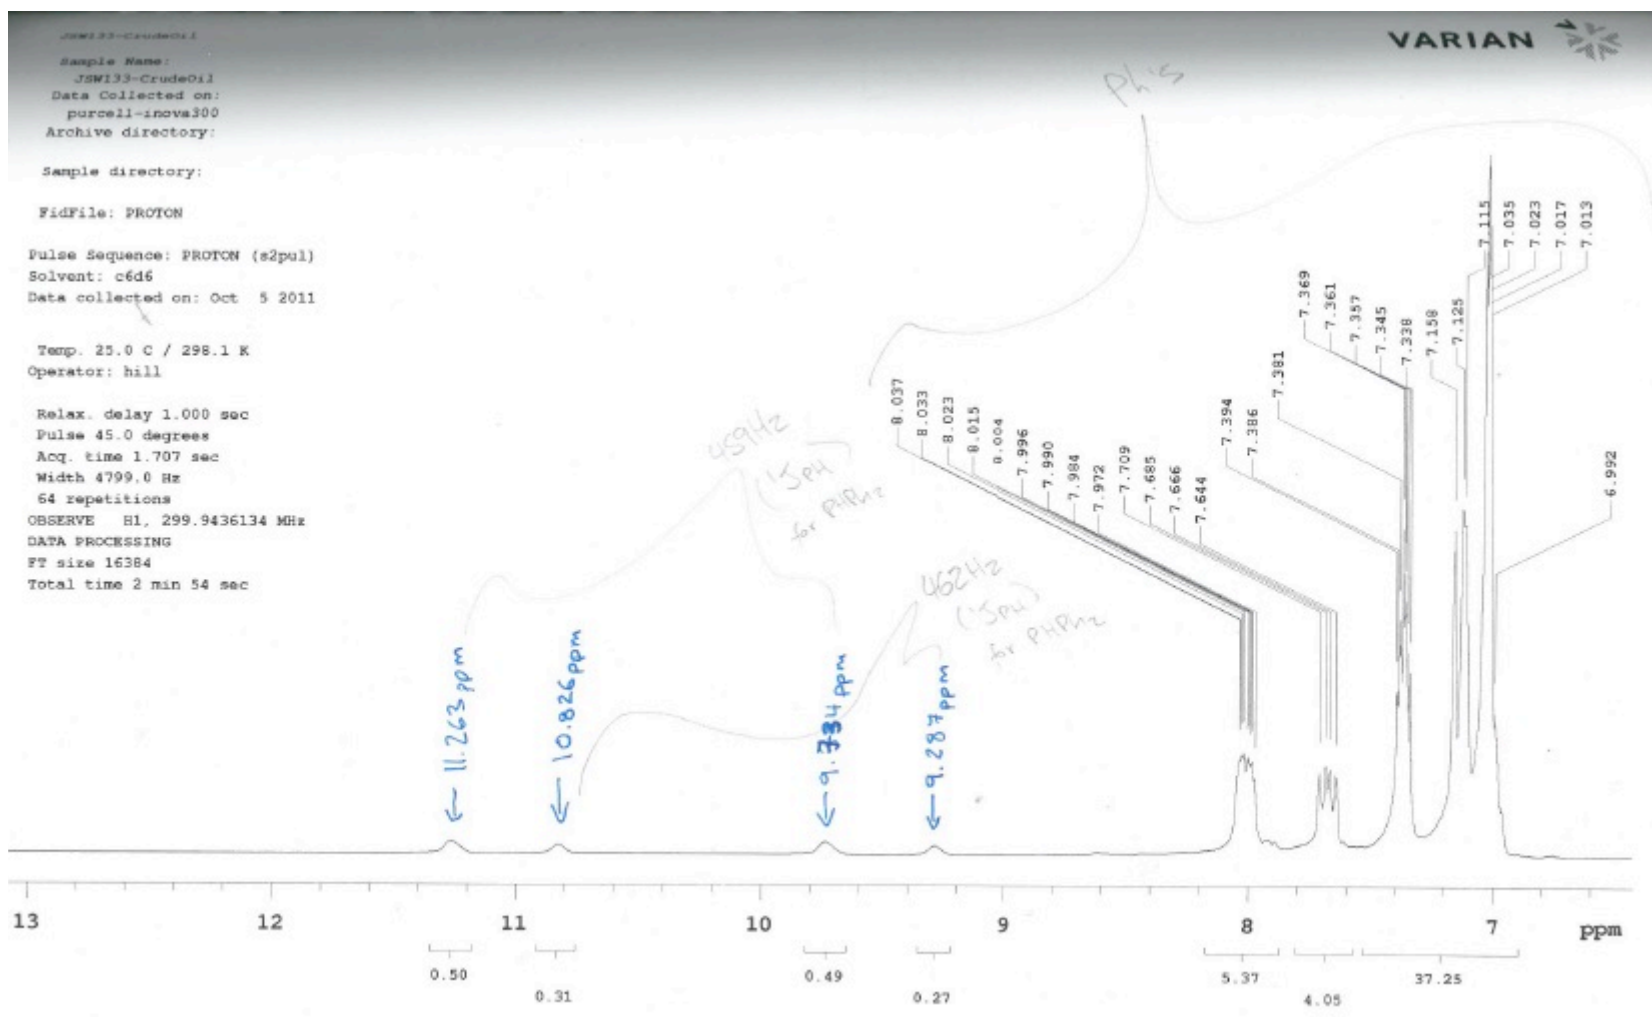

Compound 6 – <sup>1</sup>H NMR spectrum



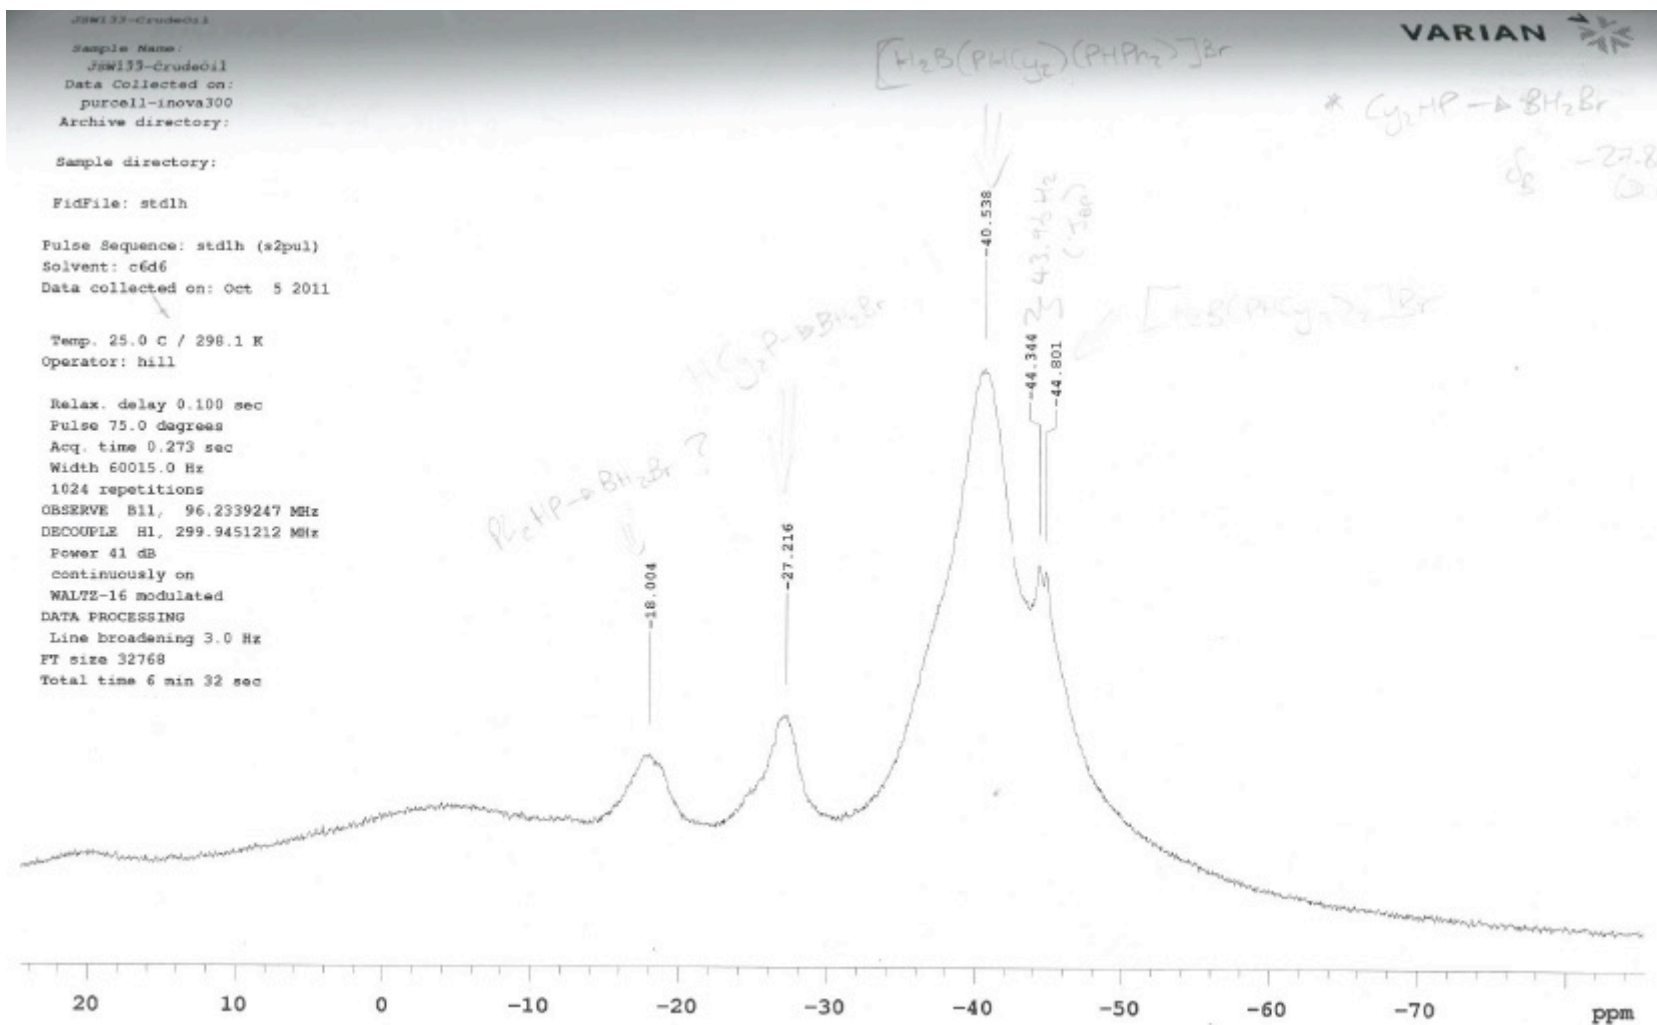

Compound 6 -  $^{11}B\{^1H\}$  NMR spectrum

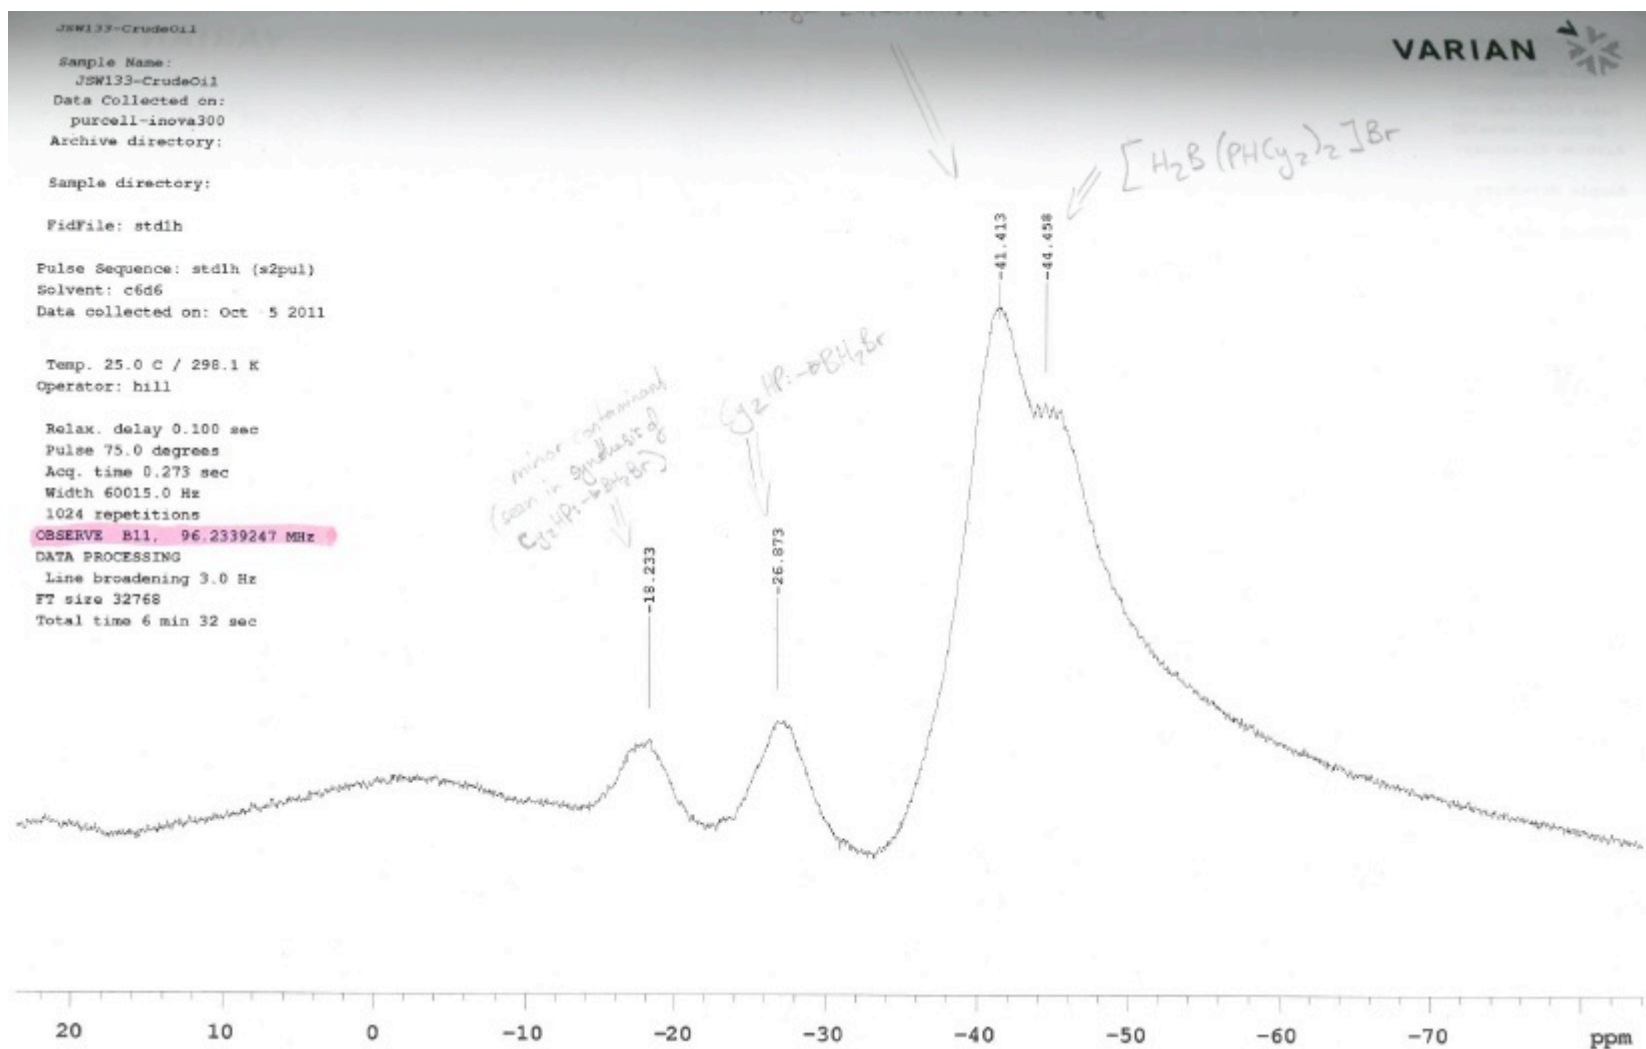

Compound 6 –  $^{11}B$  NMR spectrum

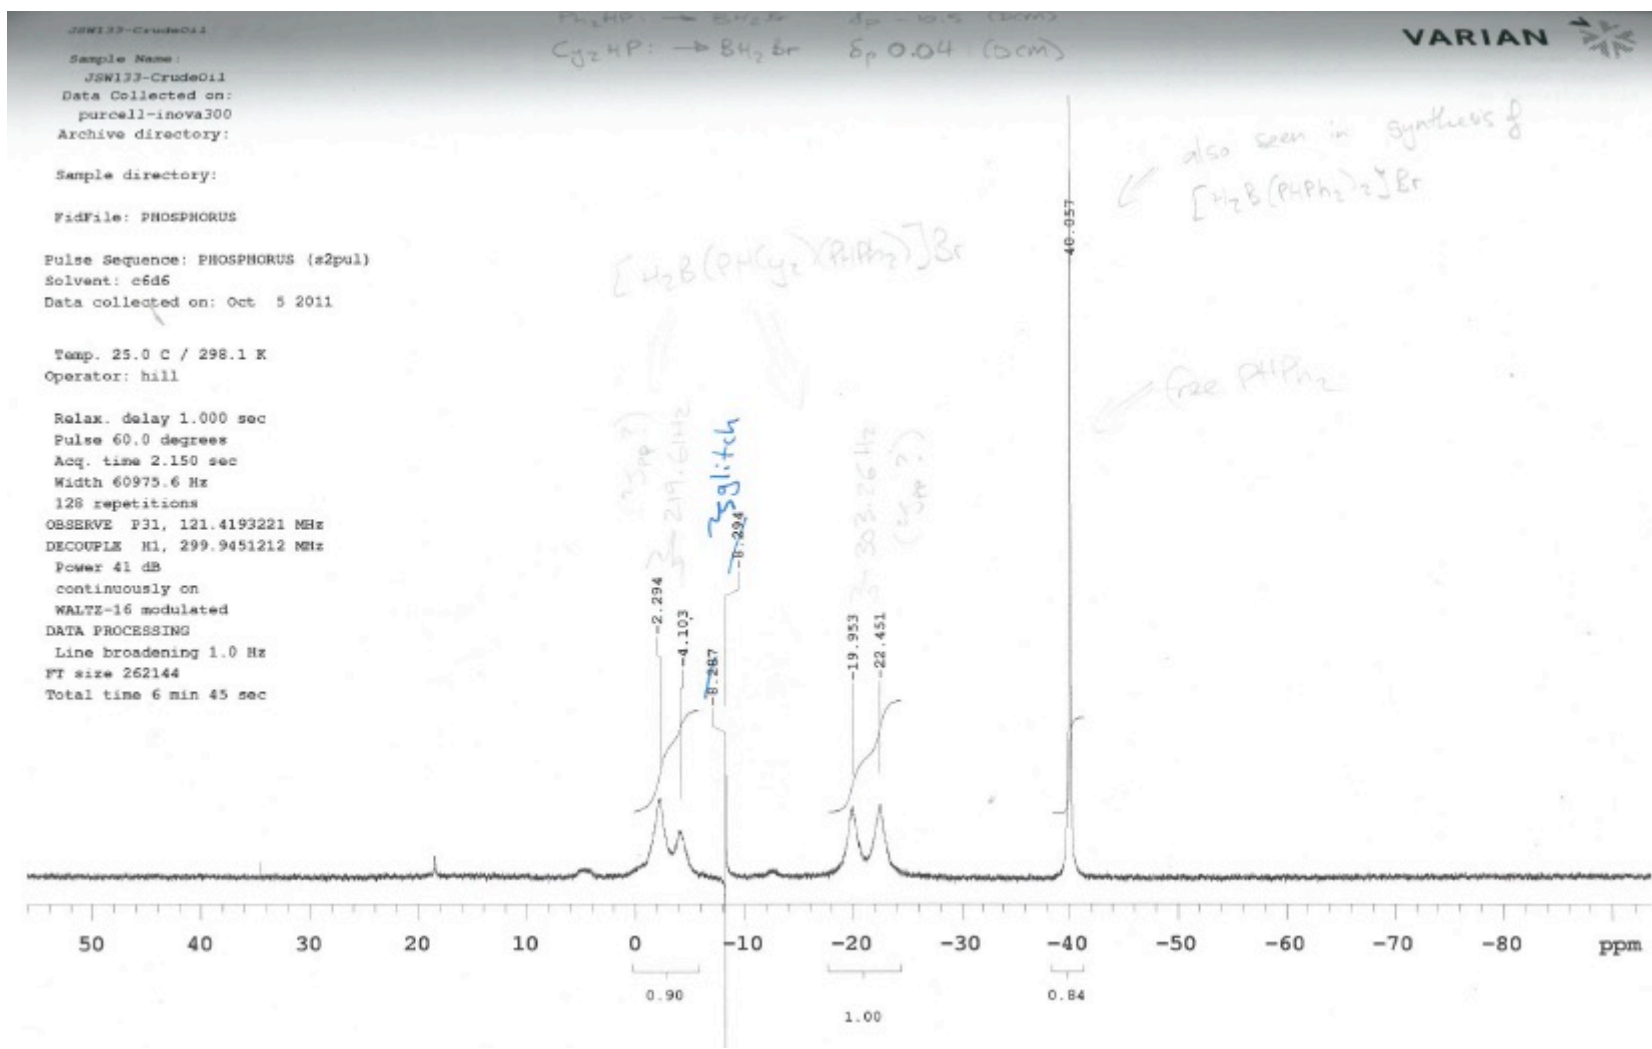

Compound 6 –  $^{31}P\{^1H\}$  NMR spectrum

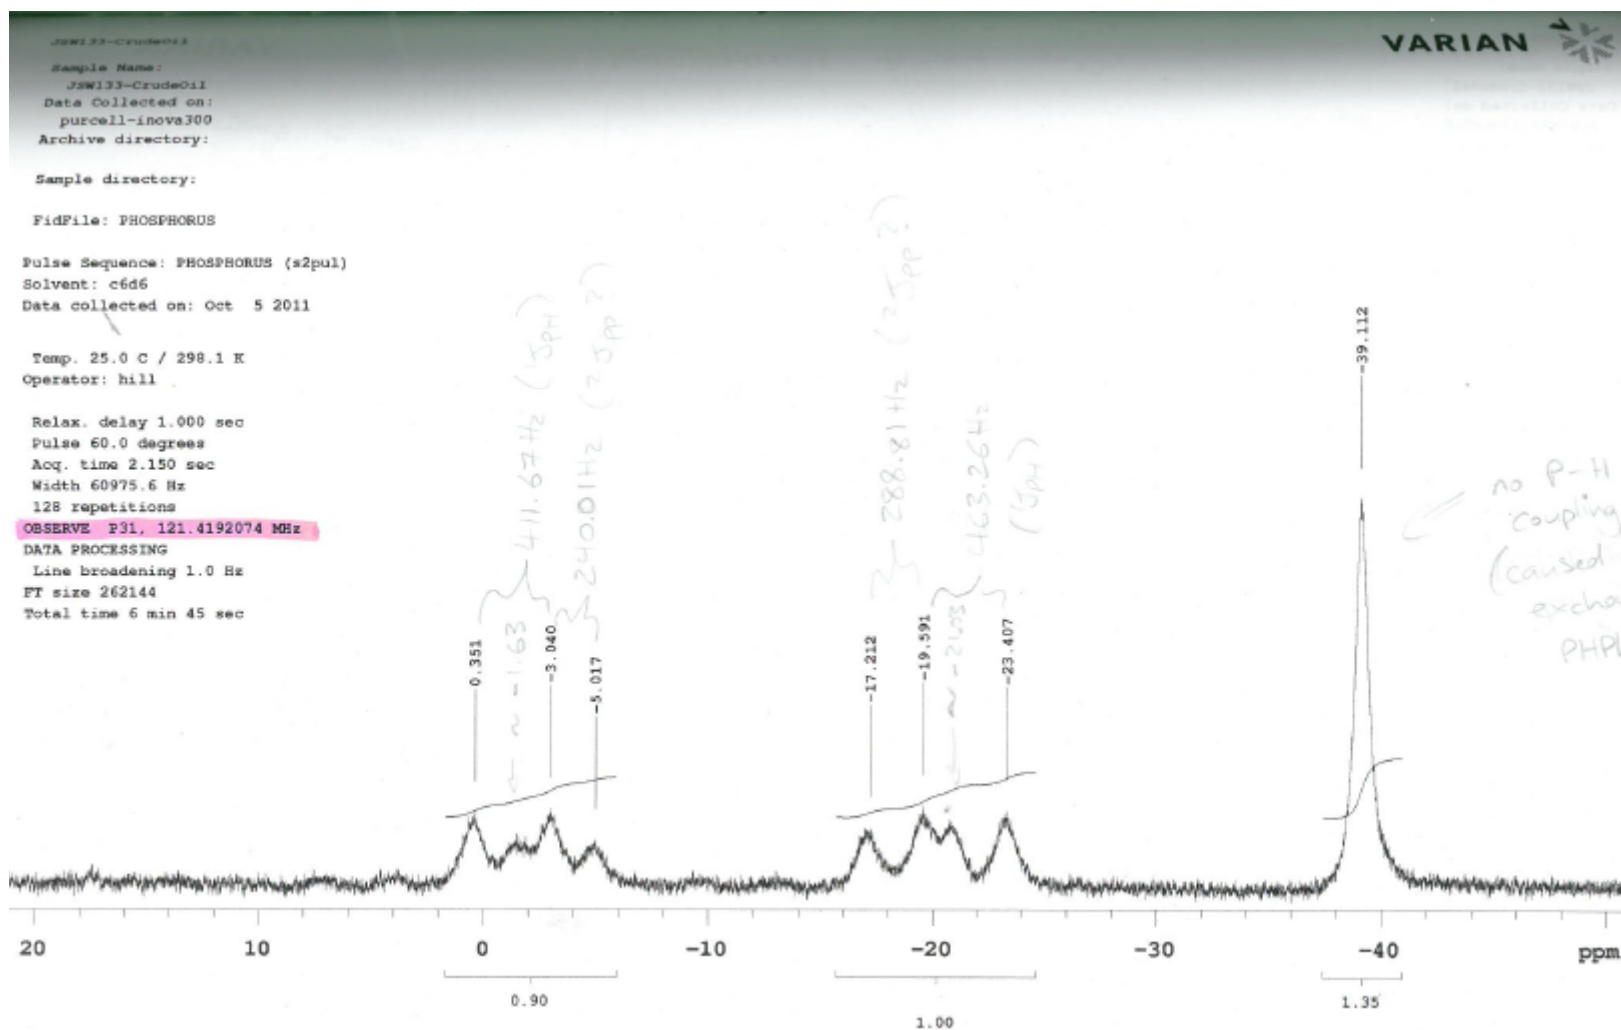

Compound 6 – <sup>31</sup>P NMR spectrum



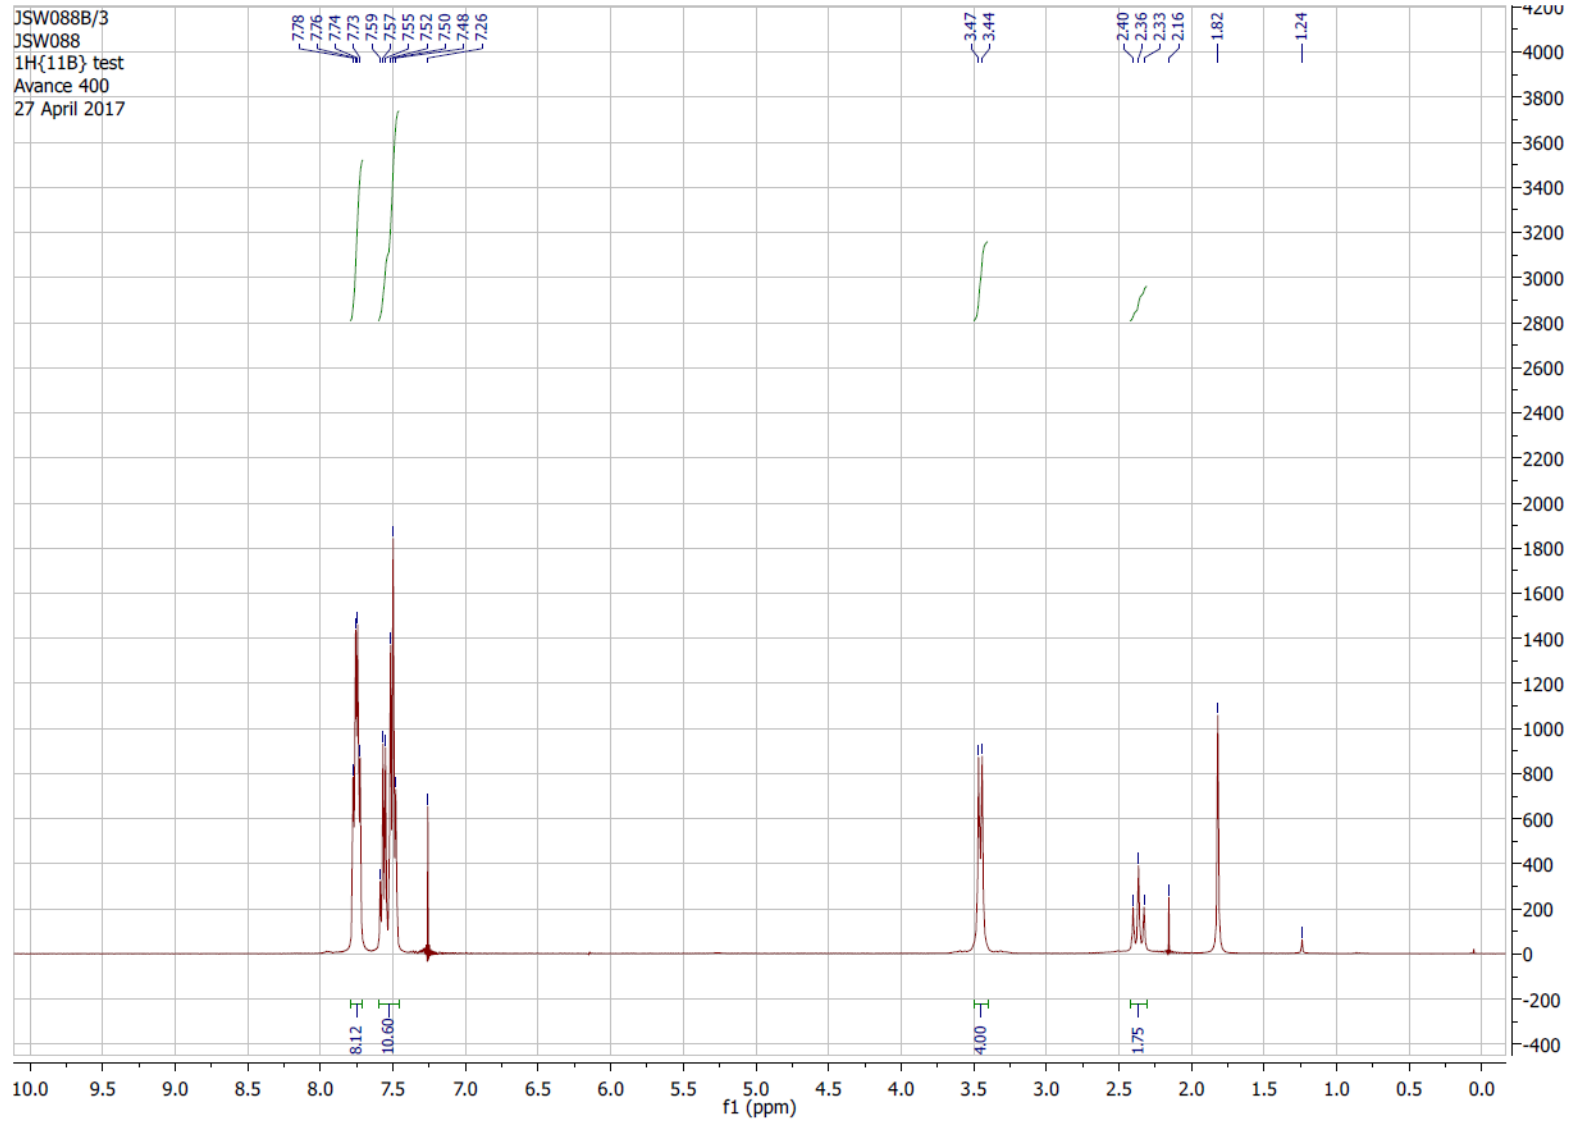

Compound 7 –  $^1\text{H}\{^{11}\text{B}\}$  NMR spectrum

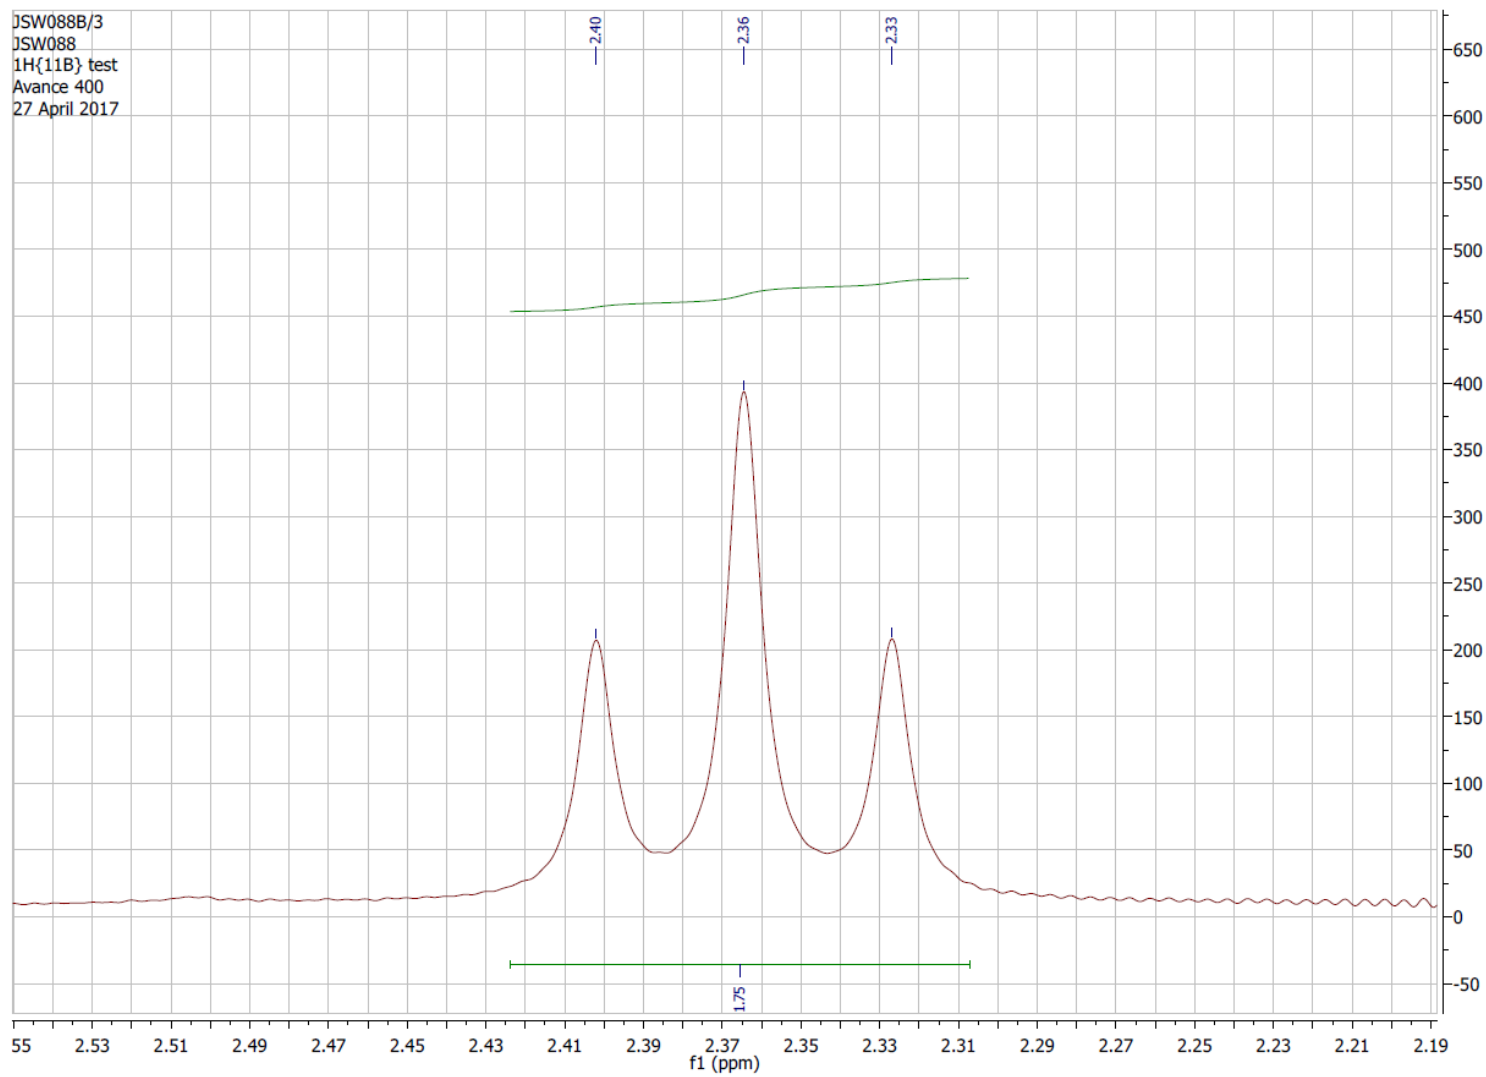

Compound 7 –  $^1\text{H}\{^{11}\text{B}\}$  NMR spectrum (Expansion of  $\text{BH}_2$  resonances)

JSW088-Benz\_Pent\_Precip.

VARIAN 

Sample Name:  
JSW088-Benz\_Pent\_Precip\_  
Data Collected on:  
purcell-inova300  
Archive directory:  
Sample directory:  
FidFile: std1h  
Pulse Sequence: std1h (s2pul)  
Solvent: cdcl3  
Data collected on: Jul 29 2011  
Temp. 25.0 C / 298.1 K  
Operator: hill  
Relax. delay 0.100 sec  
Pulse 75.0 degrees  
Acq. time 0.273 sec  
Width 60015.0 Hz  
1024 repetitions  
OBSERVE B11, 96.2339197 MHz  
DECOUPLE H1, 299.9450942 MHz  
Power 41 dB  
continuously on  
WALTZ-16 modulated  
DATA PROCESSING  
Line broadening 3.0 Hz  
FT size 32768  
Total time 6 min 32 sec

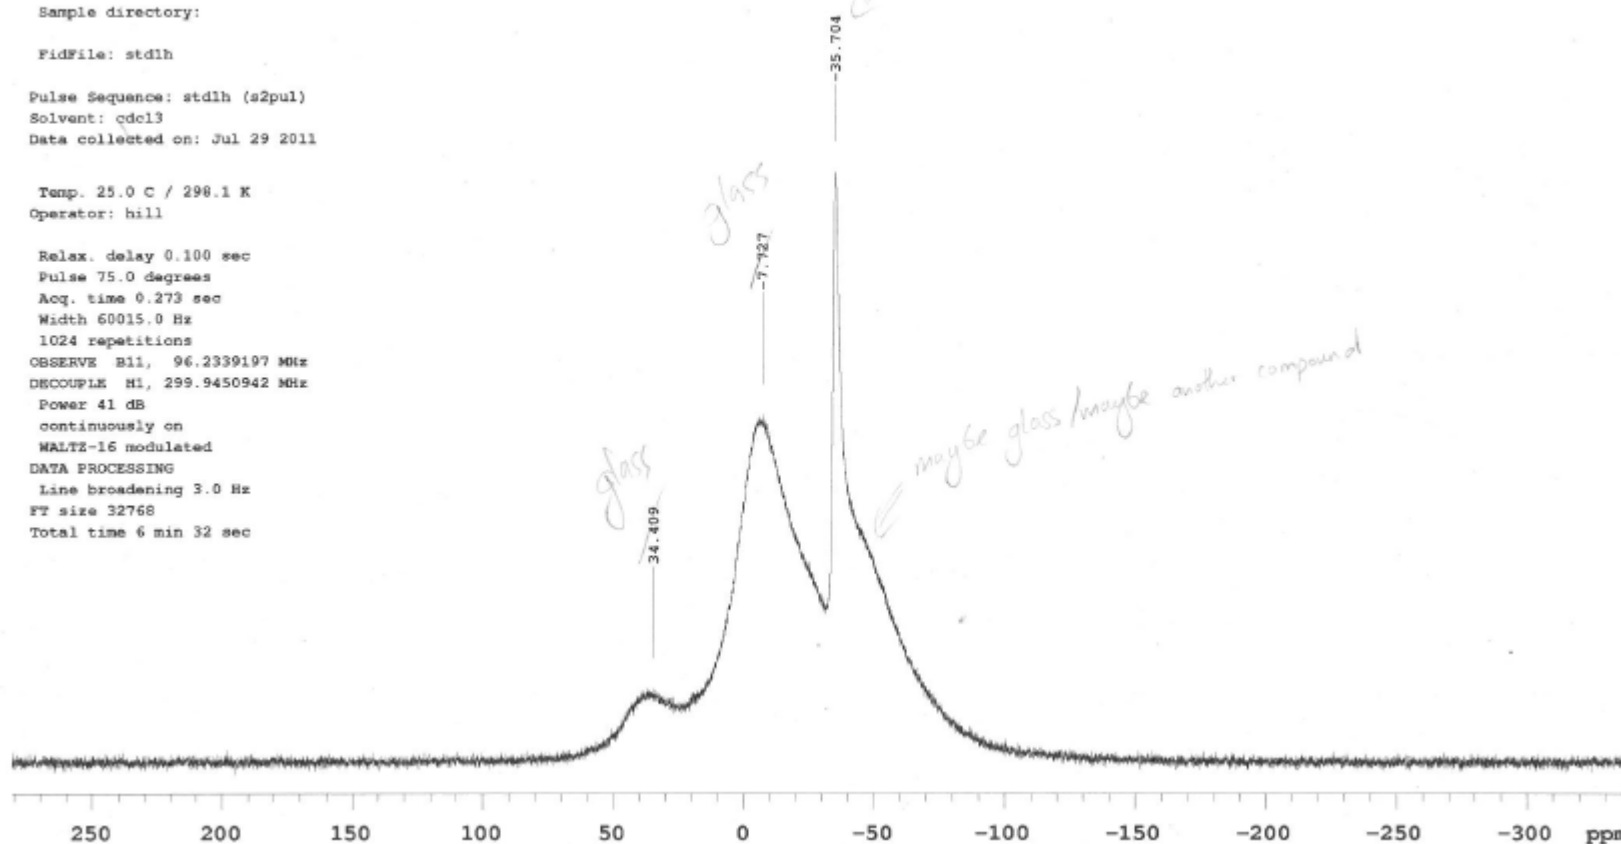

Compound 7 -  $^{11}\text{B}\{^1\text{H}\}$  NMR spectrum



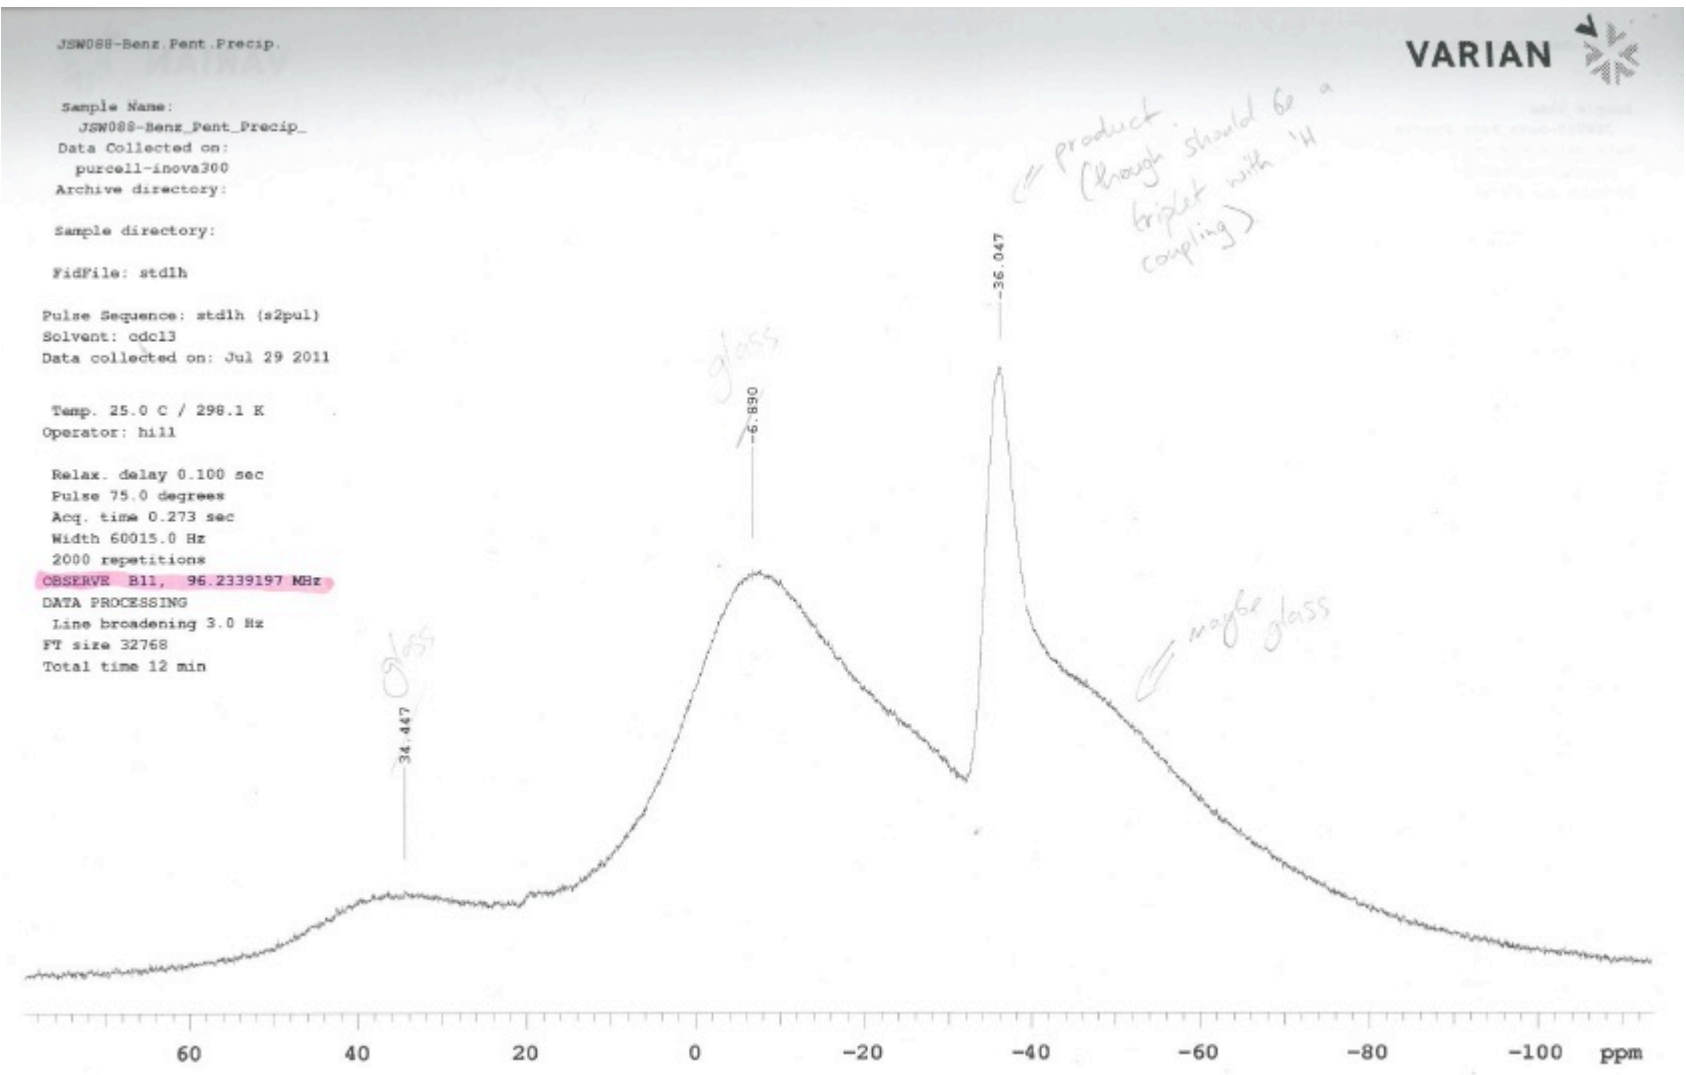

Compound 7 –  $^{11}\text{B}$  NMR spectrum

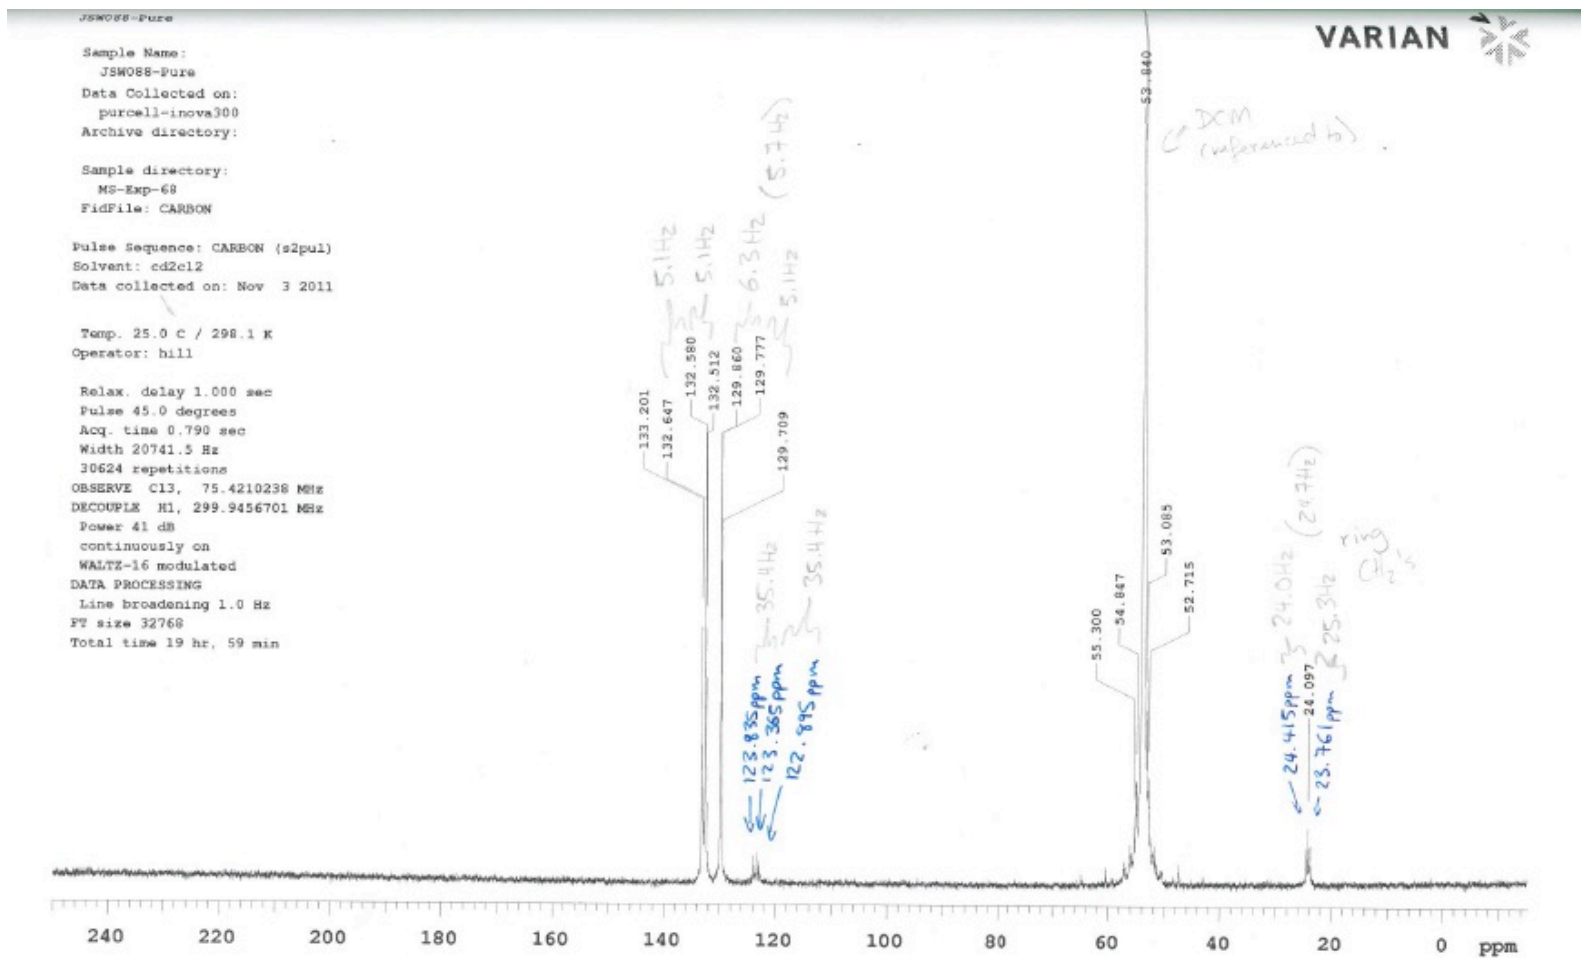

Compound 7 –  $^{13}\text{C}\{^1\text{H}\}$  NMR spectrum

JSW088-Benz.Pent.Precip.

VARIAN 

Sample Name:  
JSW088-Benz.Pent.Precip\_  
Data Collected on:  
purcell-inova300  
Archive directory:

Sample directory:

Fidfile: PHOSPHORUS

Pulse Sequence: PHOSPHORUS (s2pul)  
Solvent: cdcl3  
Data collected on: Jul 29 2011

Temp. 25.0 C / 298.1 K  
Operator: hill

Relax. delay 1.000 sec  
Pulse 60.0 degrees  
Acq. time 2.150 sec  
Width 60975.6 Hz  
256 repetitions  
OBSERVE P31, 121.4192923 MHz  
DECOUPLE H1, 299.9450942 MHz  
Power 41 dB  
continuously on  
WALTZ-16 modulated  
DATA PROCESSING  
Line broadening 1.0 Hz  
FT size 262144  
Total time 13 min

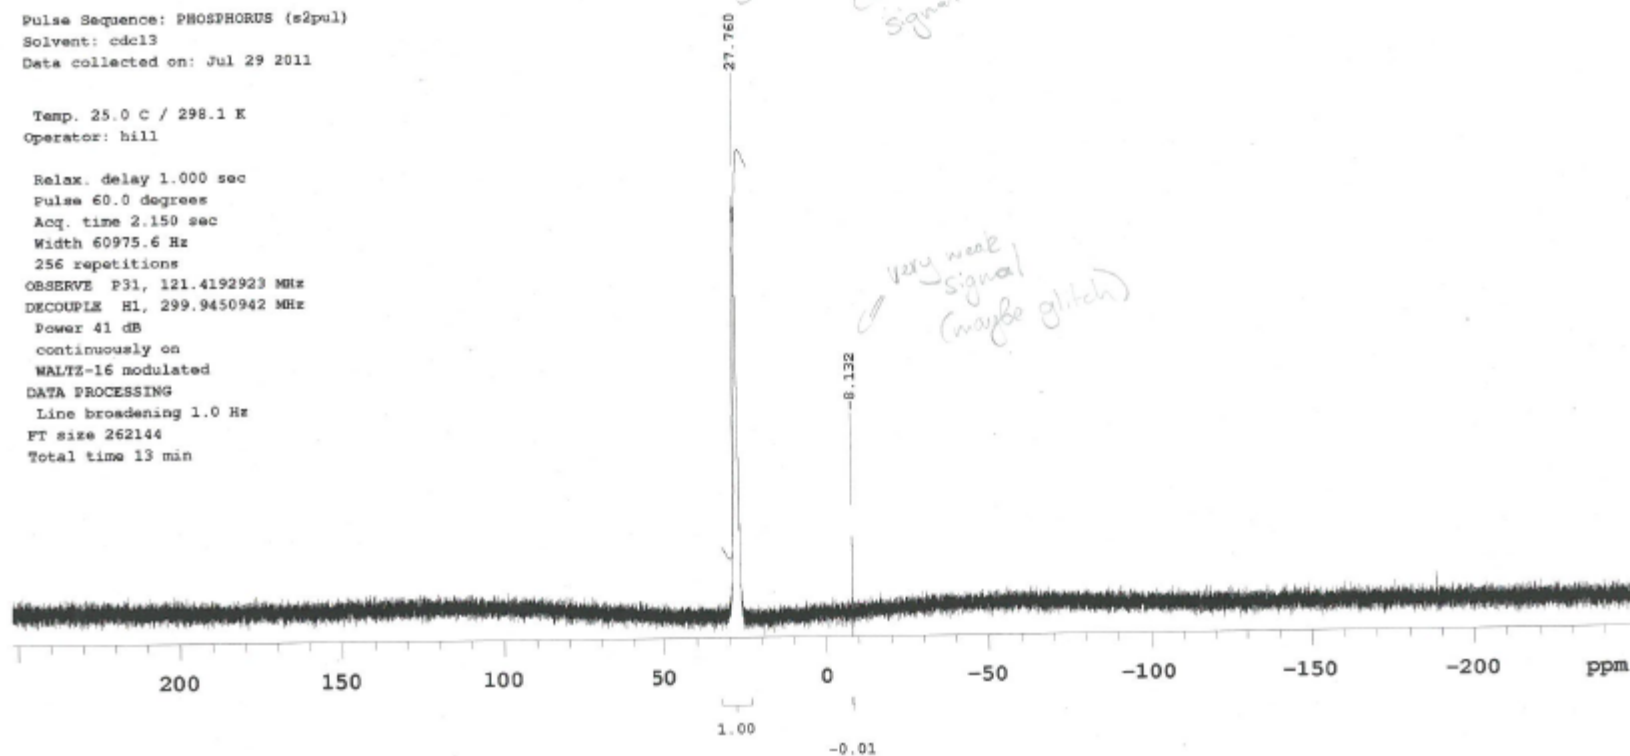

Compound 7 -  $^{31}\text{P}\{^1\text{H}\}$  NMR spectrum



JSM179-Crystals

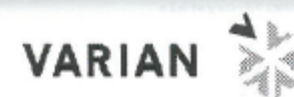

Sample Name:  
JSM179-Crystals  
Data Collected on:  
purcell-inova300  
Archive directory:

Sample directory:

FidFile: std1h

Pulse Sequence: std1h (s2pul)  
Solvent: cd2cl2  
Data collected on: Feb 8 2012

Temp. 25.0 C / 298.1 K  
Operator: bill

Relax. delay 0.100 sec  
Pulse 75.0 degrees  
Acq. time 0.273 sec  
Width 60015.0 Hz  
1024 repetitions  
OBSERVE B11, 96.2341081 MHz  
DECOUPLE H1, 299.9456701 MHz  
Power 41 dB  
continuously on  
WALTZ-16 modulated  
DATA PROCESSING  
Line broadening 3.0 Hz  
FT size 32768  
Total time 6 min 31 sec

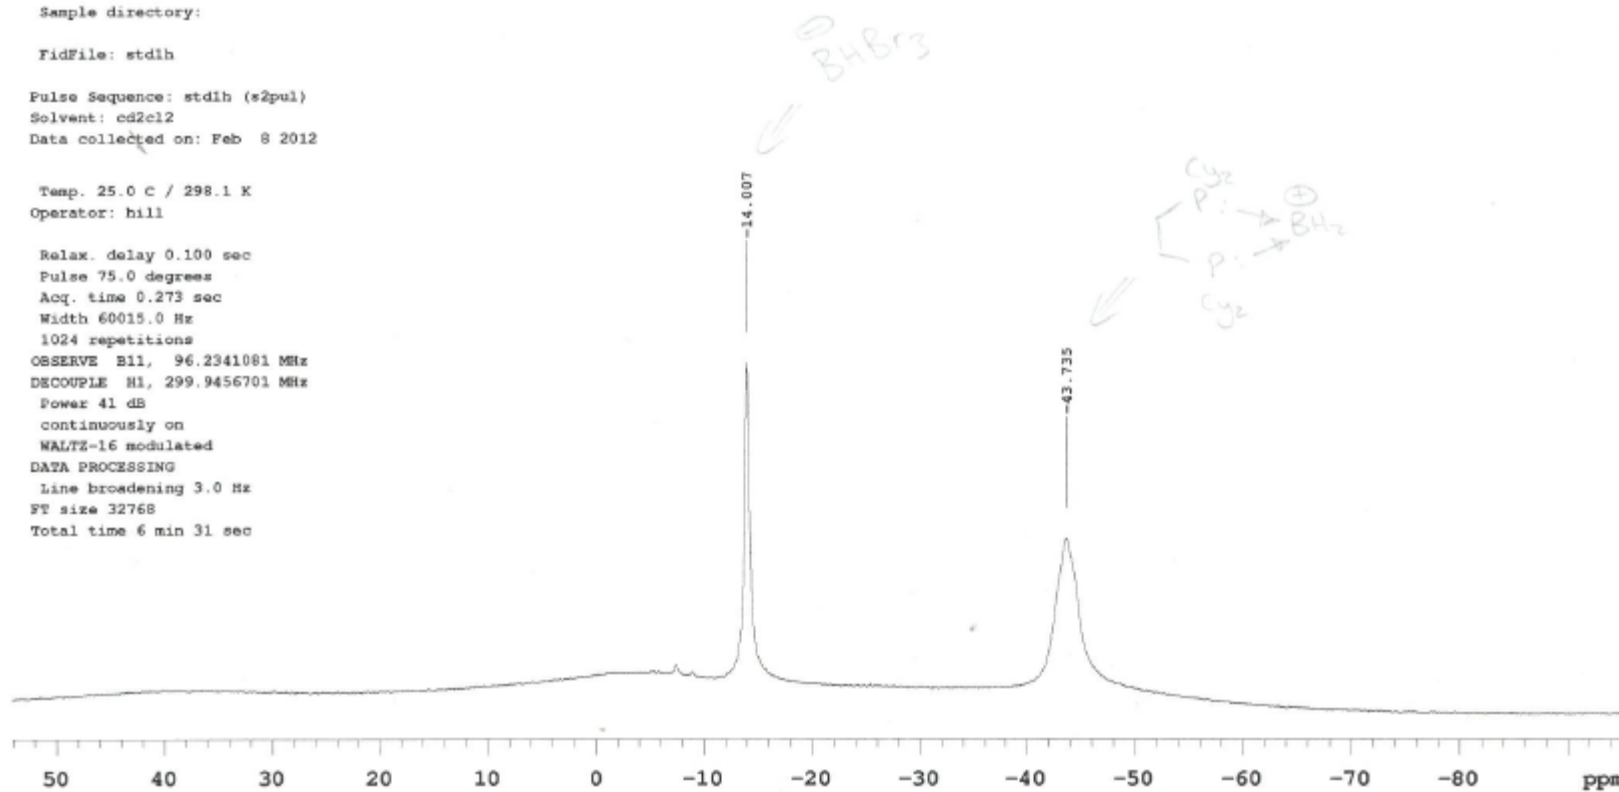

Compound 8 -  $^{11}\text{B}\{^1\text{H}\}$  NMR spectrum

JSW179-Crystals

Sample Name:  
JSW179-Crystals  
Data Collected on:  
purchell-inova300  
Archive directory:

Sample directory:

FidFile: std1h

Pulse Sequence: std1h (s2pul)  
Solvent: cd2cl2  
Data collected on: Feb 8 2012

Temp. 25.0 C / 298.1 K  
Operator: hill

Relax. delay 0.100 sec  
Pulse 75.0 degrees  
Acq. time 0.273 sec  
Width 60015.0 Hz  
736 repetitions

OBSERVE B11, 96.2341081 MHz

DATA PROCESSING  
Line broadening 3.0 Hz  
FT size 32768  
Total time 6 min 31 sec

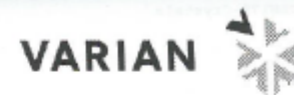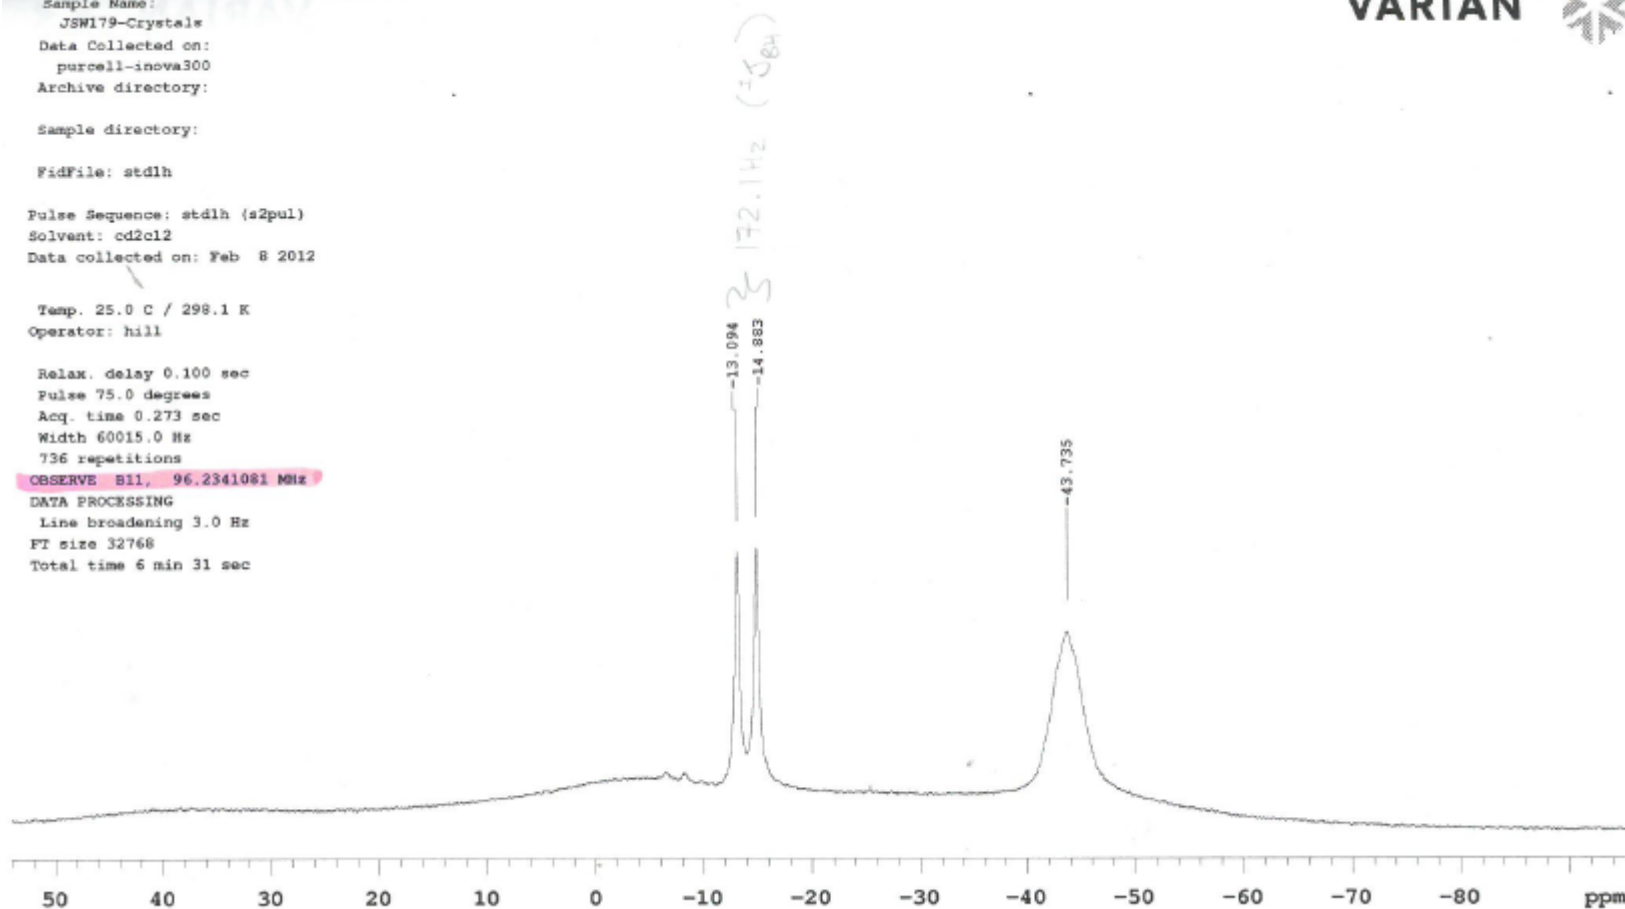

Compound 8 –  $^{11}\text{B}$  NMR spectrum

JSW179-Crystals

Sample Name:  
JSW179-Crystals  
Data Collected on:  
purcell-inova300  
Archive directory:

Sample directory:

Fidfile: CARBON

Pulse Sequence: CARBON (s2pul)  
Solvent: cd2cl2  
Data collected on: Feb 8 2012

Temp. 25.0 C / 298.1 K  
Operator: hill

Relax. delay 1.000 sec  
Pulse 45.0 degrees  
Acq. time 0.790 sec  
Width 20741.5 Hz  
2088 repetitions  
OBSERVE C13, 75.4209934 MHz  
DECOUPLE H1, 299.9456701 MHz  
Power 41 dB  
continuously on  
WALTZ-16 modulated  
DATA PROCESSING  
Line broadening 1.0 Hz  
FT size 32768  
Total time 1 hr, 59 min

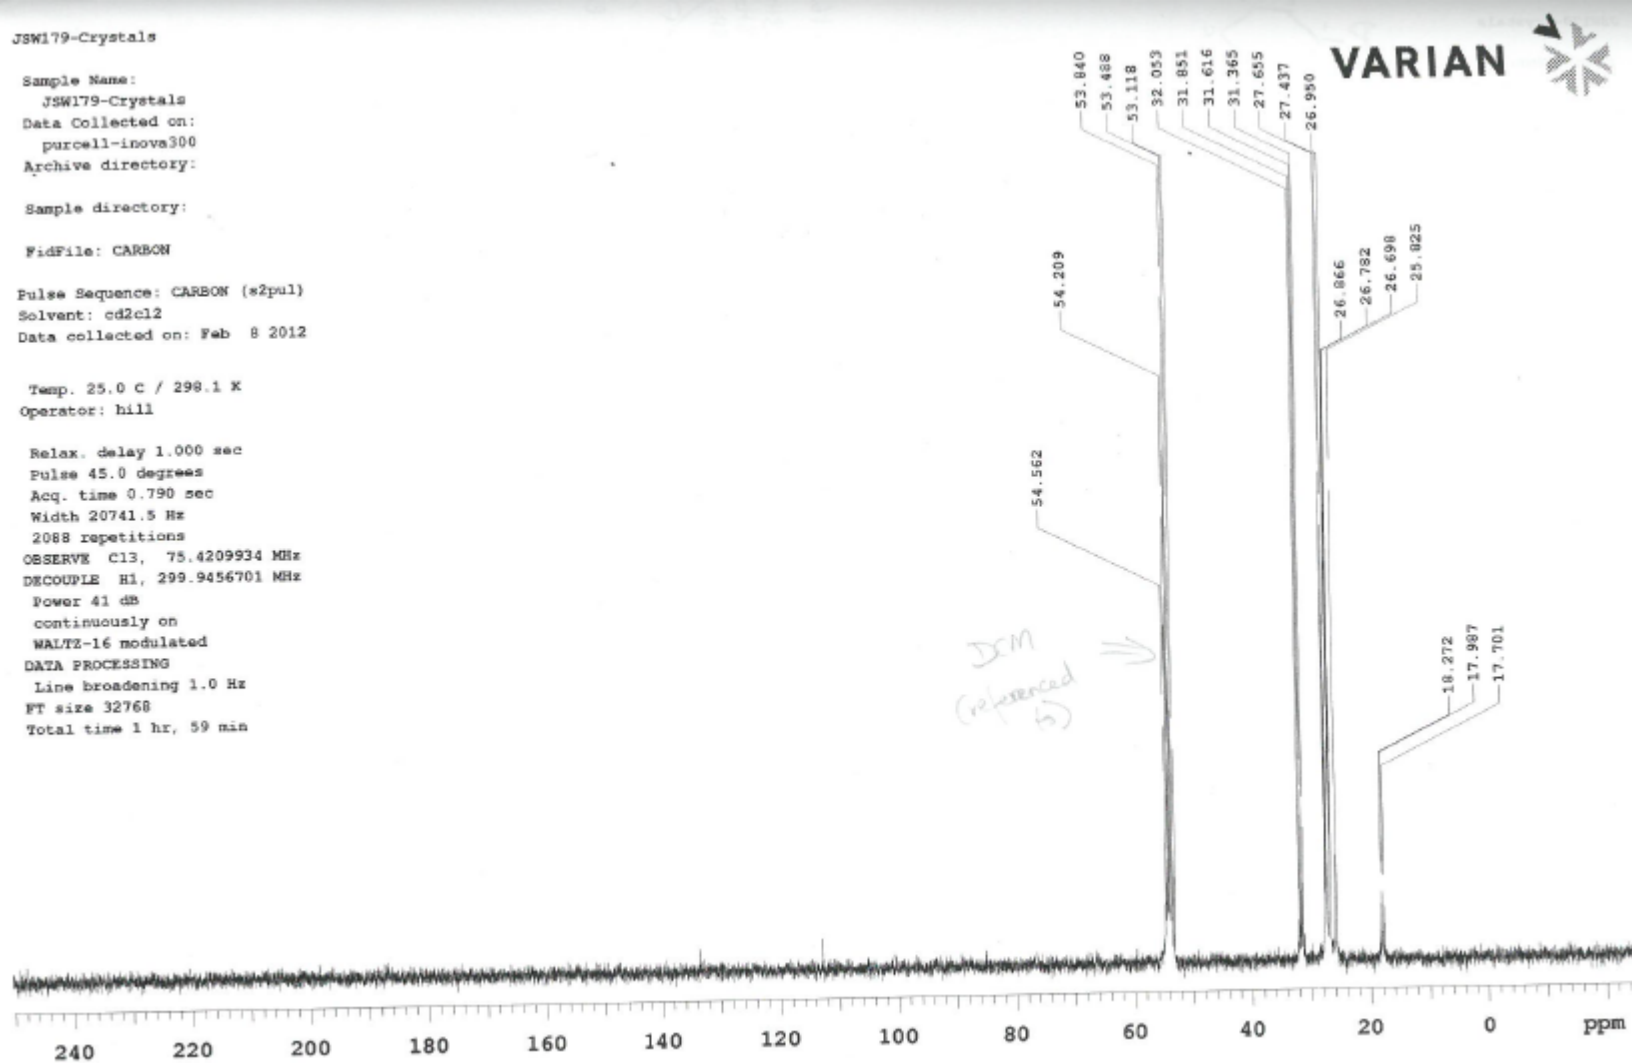

Compound 8 -  $^{13}\text{C}\{^1\text{H}\}$  NMR spectrum

JSM179-Crystals

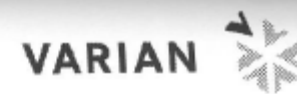

Sample Name:  
JSM179-Crystals  
Data Collected on:  
purcell-inova300  
Archive directory:

Sample directory:

FidFile: PHOSPHORUS

Pulse Sequence: PHOSPHORUS (s2pul)  
Solvent: cd2cl2  
Data collected on: Feb 8 2012

Temp. 25.0 C / 298.1 K  
Operator: hill

Relax. delay 1.000 sec  
Pulse 60.0 degrees  
Acq. time 2.150 sec  
Width 60975.6 Hz  
128 repetitions  
OBSERVE P31, 121.4195536 MHz  
DECOUPLE H1, 299.9456701 MHz  
Power 41 dB  
continuously on  
WALTZ-16 modulated  
DATA PROCESSING  
Line broadening 1.0 Hz  
FT size 262144  
Total time 6 min 44 sec

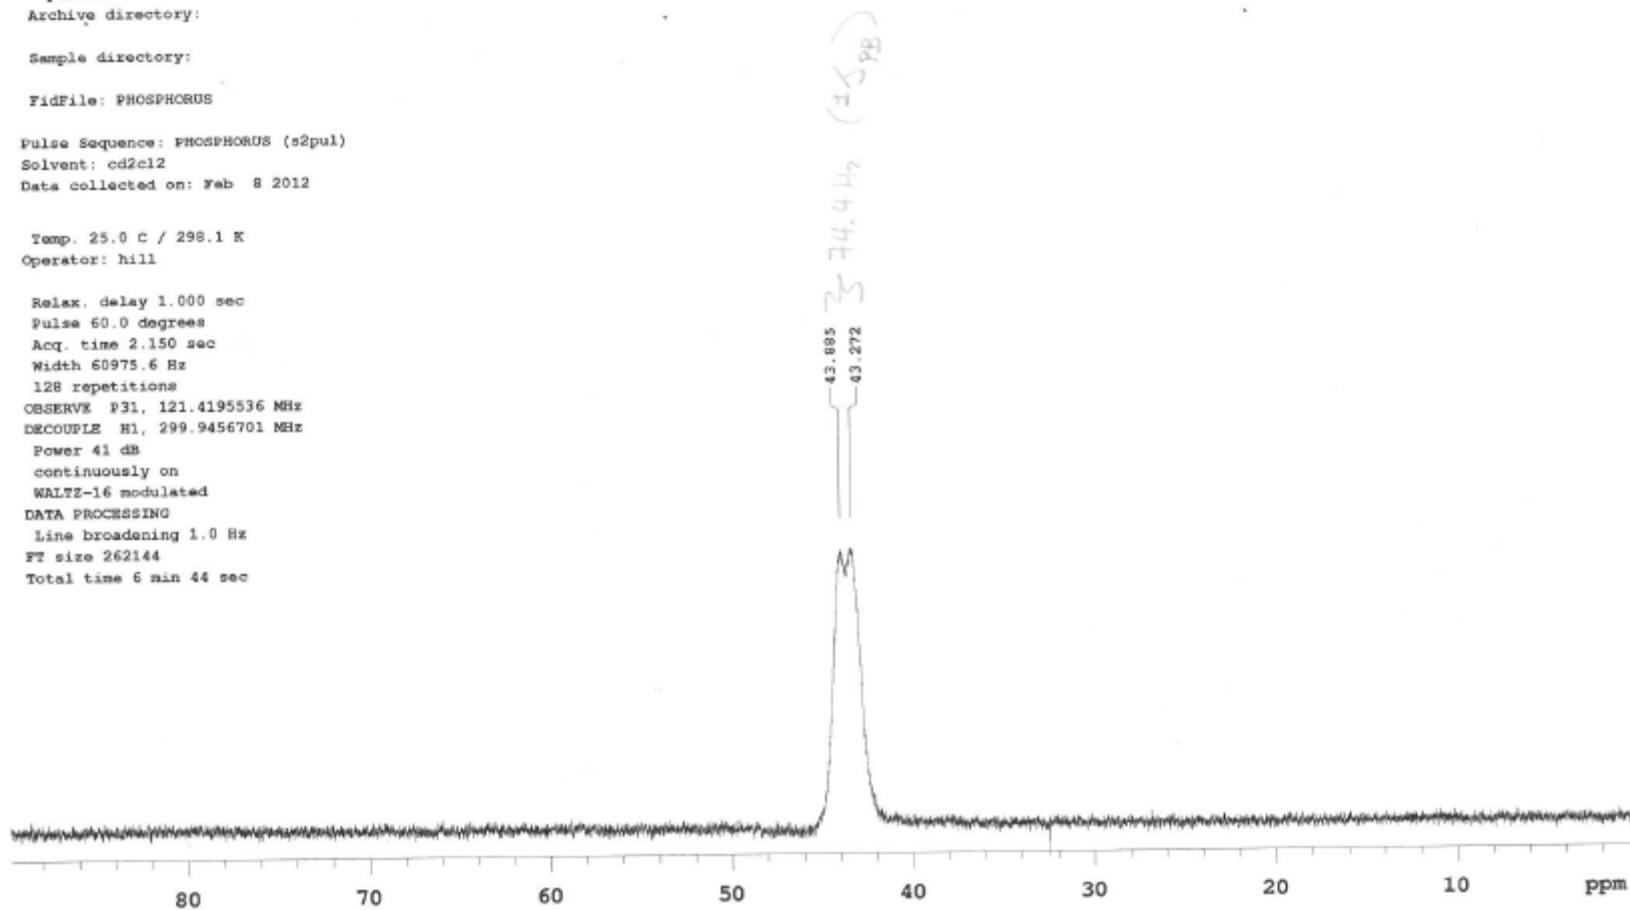

Compound 8 -  $^{31}\text{P}\{^1\text{H}\}$  NMR spectrum



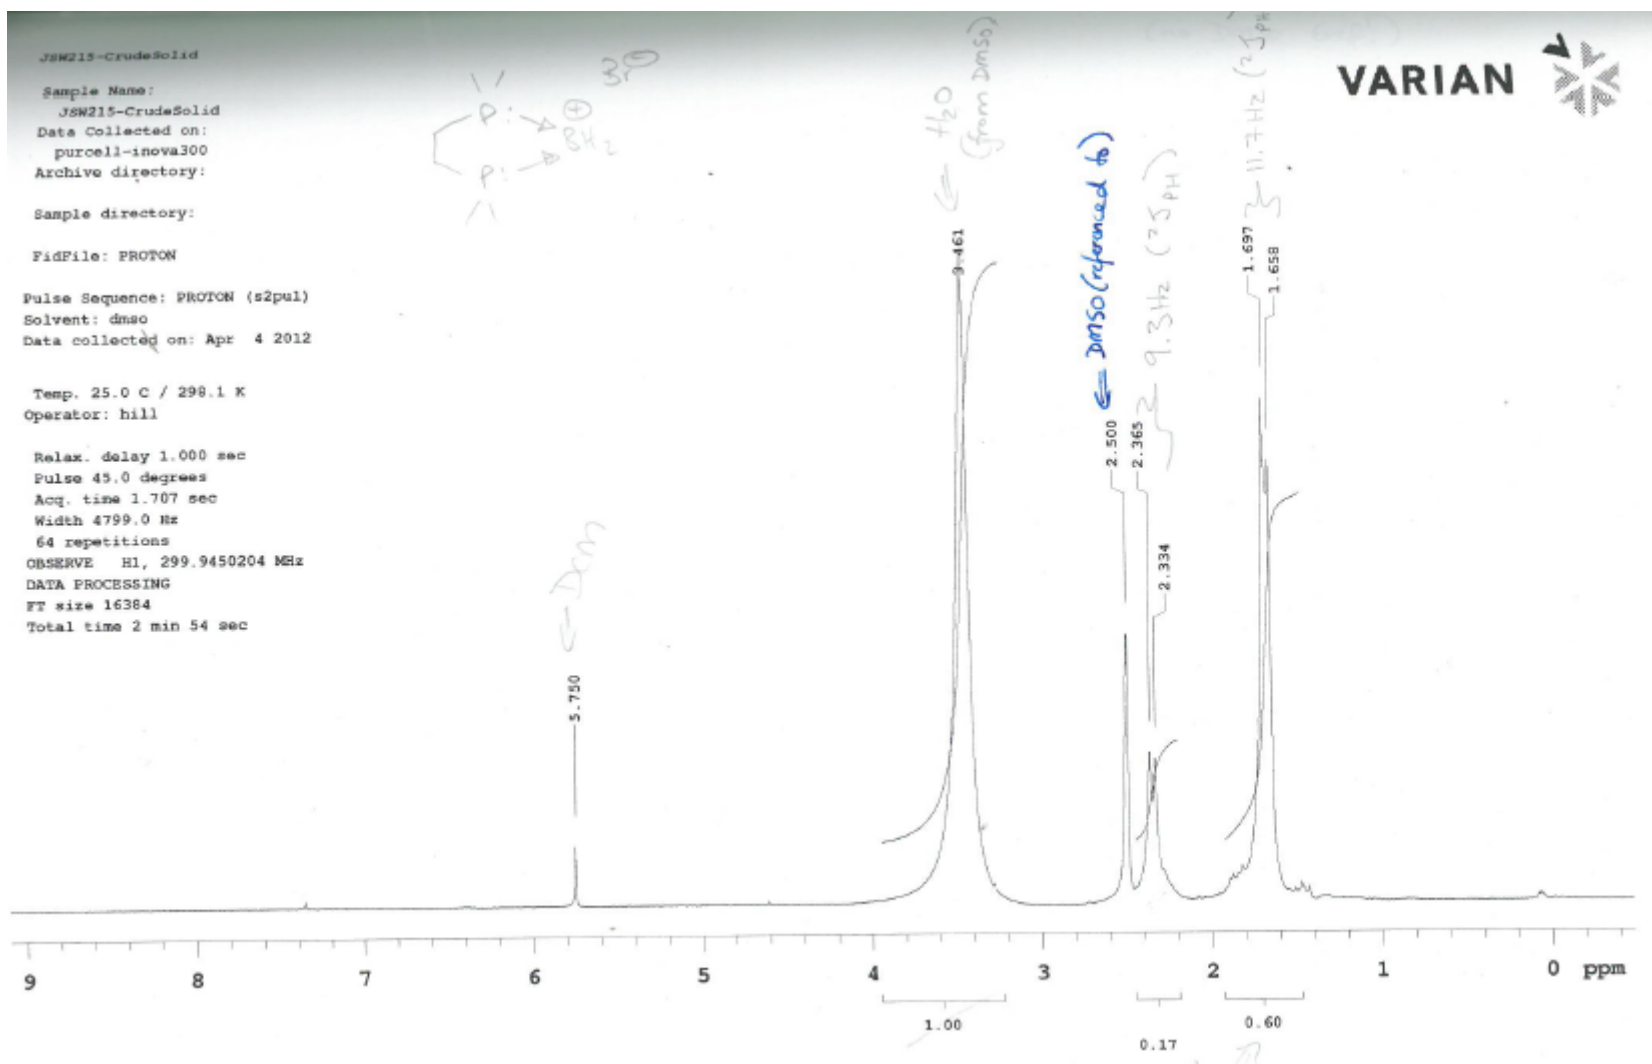

Compound 9 – <sup>1</sup>H NMR spectrum

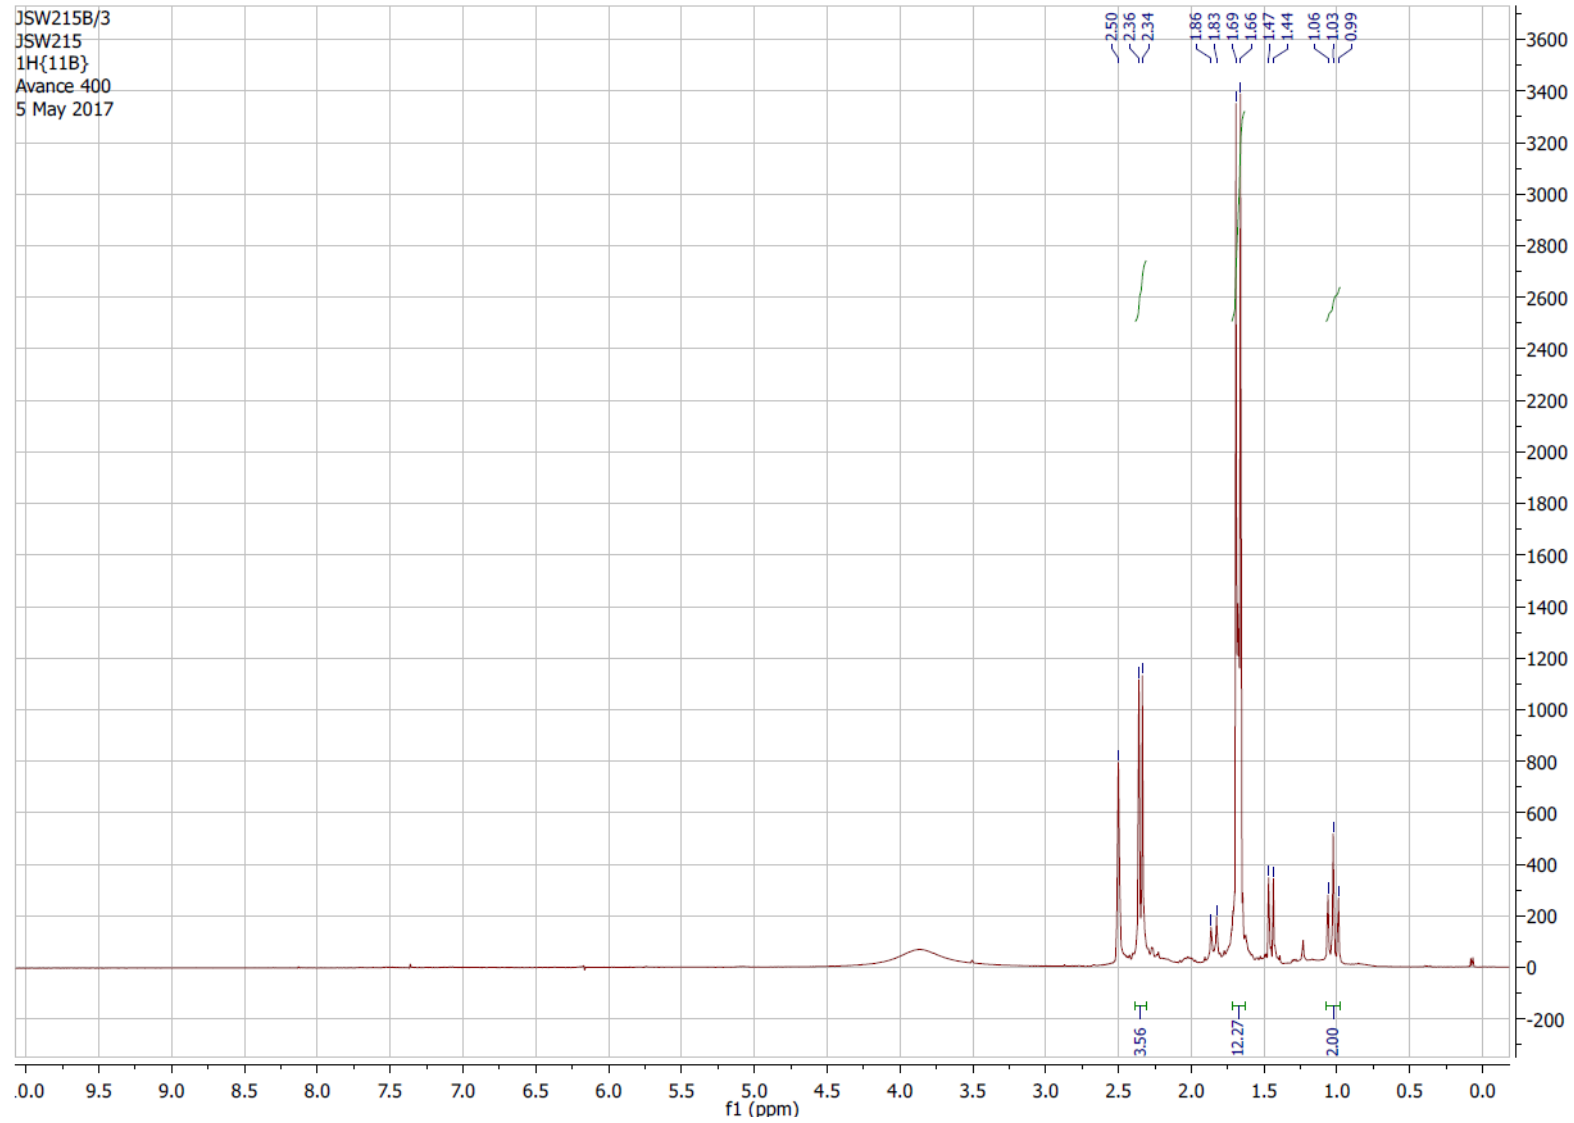

Compound 9 –  $^1\text{H}\{^{11}\text{B}\}$  NMR spectrum

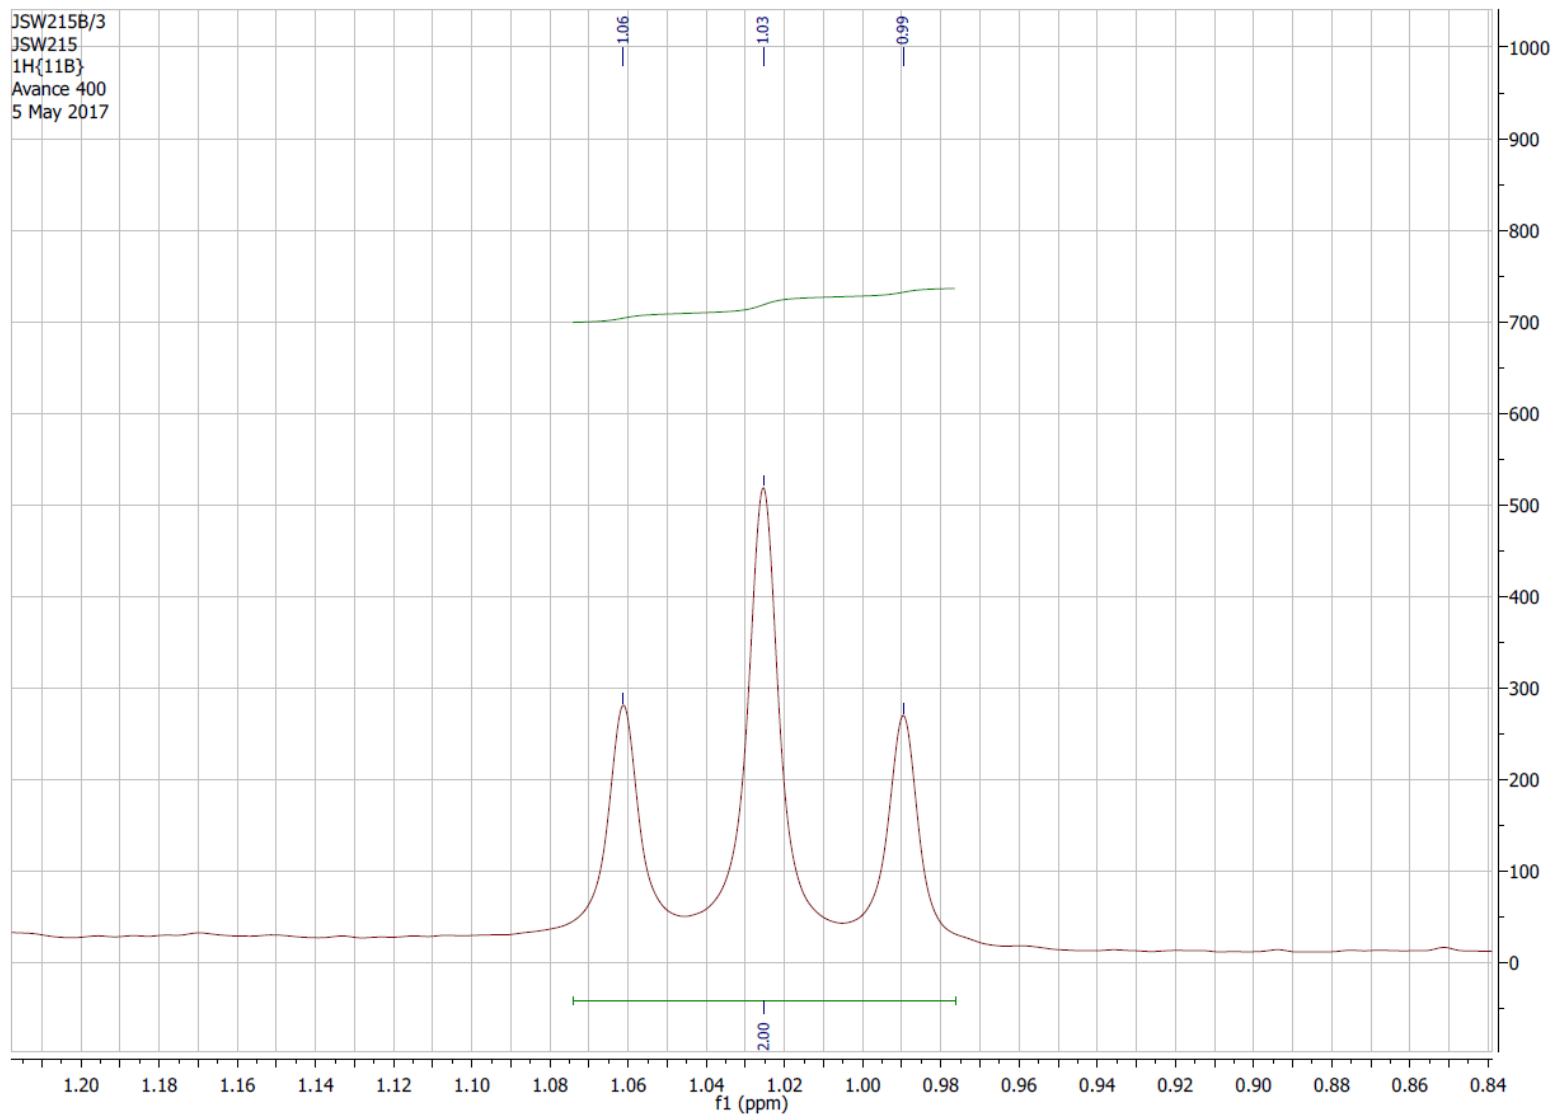

Compound 9 –  $^1\text{H}\{^{11}\text{B}\}$  NMR spectrum (Expansion of  $\text{BH}_2$  resonance)

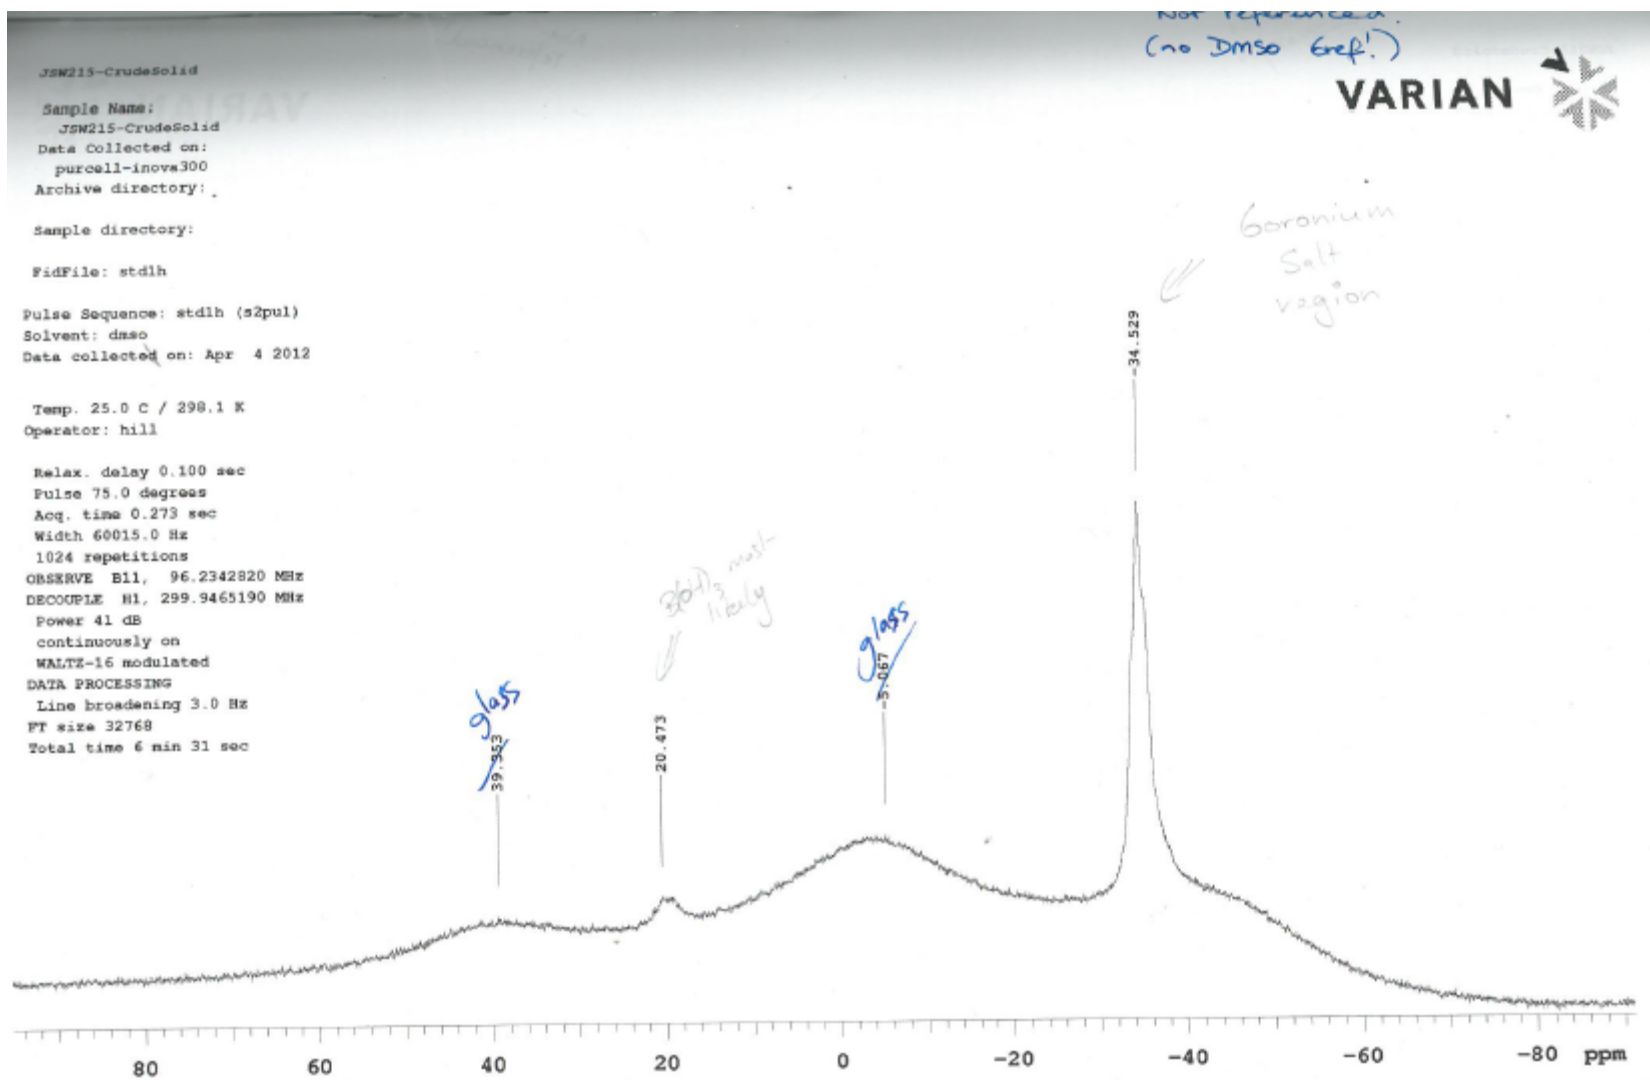

Compound 9 –  $^{11}\text{B}\{^1\text{H}\}$  NMR spectrum

Sample Name: JSM215-CrudeSolid  
Data Collected on: purcell-inova300  
Archive directory:  
Sample directory:  
FidFile: std1h  
Pulse Sequence: std1h (s2pul)  
Solvent: dmsc  
Data collected on: Apr 4 2012  
Temp. 25.0 C / 298.1 K  
Operator: hill  
Relax. delay 0.100 sec  
Pulse 75.0 degrees  
Acq. time 0.273 sec  
Width 60015.0 Hz  
512 repetitions  
OBSERVE B11, 96.2342820 MHz  
DATA PROCESSING  
Line broadening 3.0 Hz  
FT size 32768  
Total time 3 min 16 sec

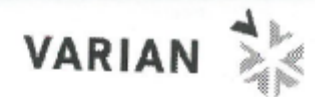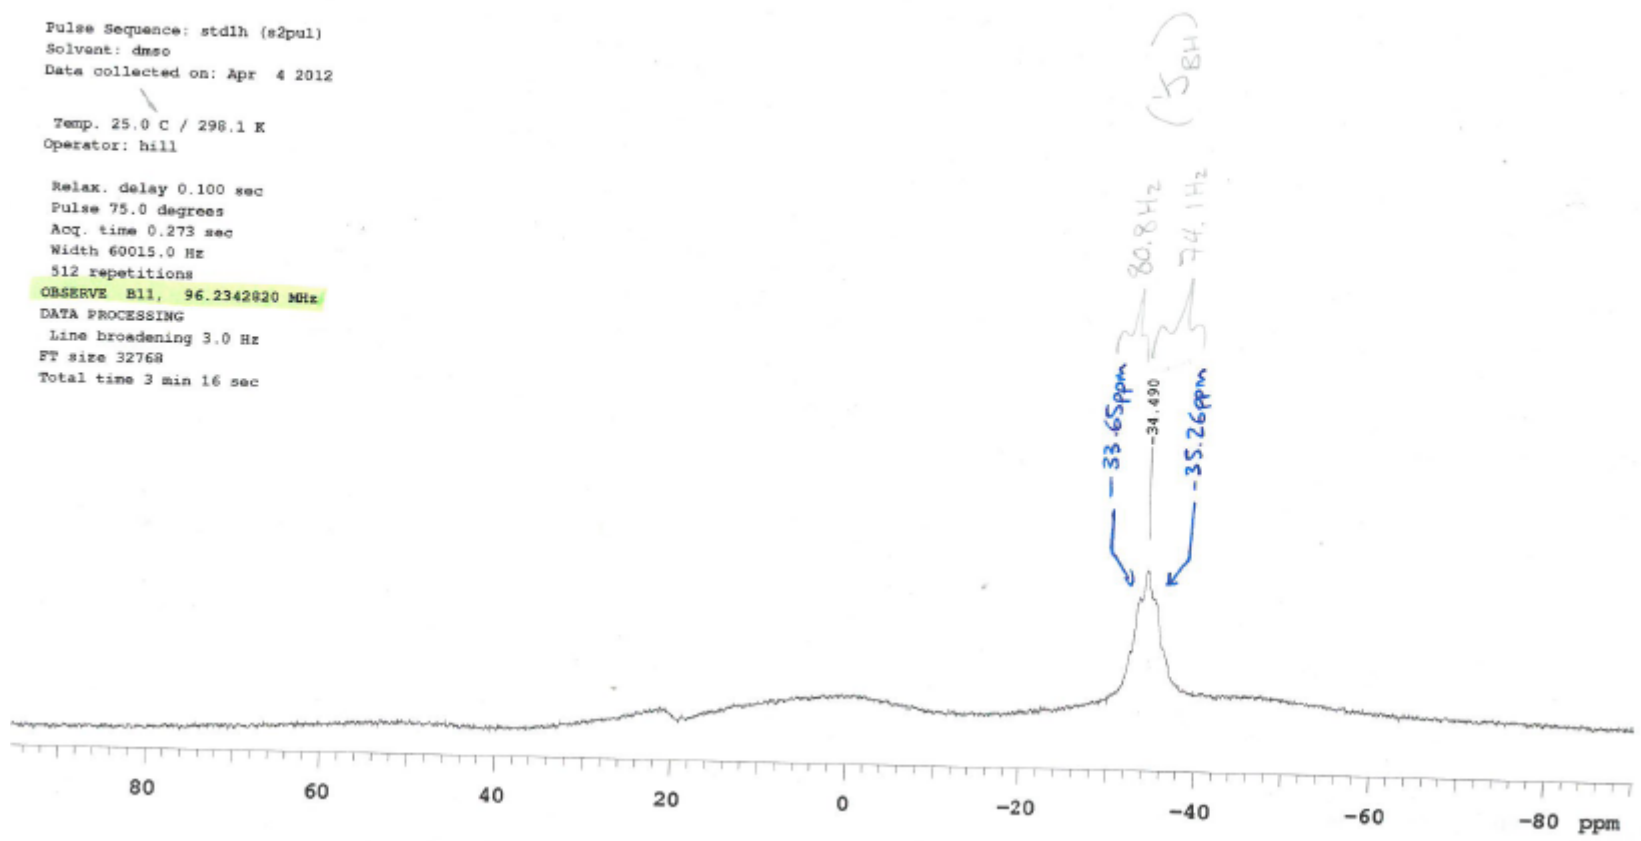

Compound 9 – <sup>11</sup>B NMR spectrum

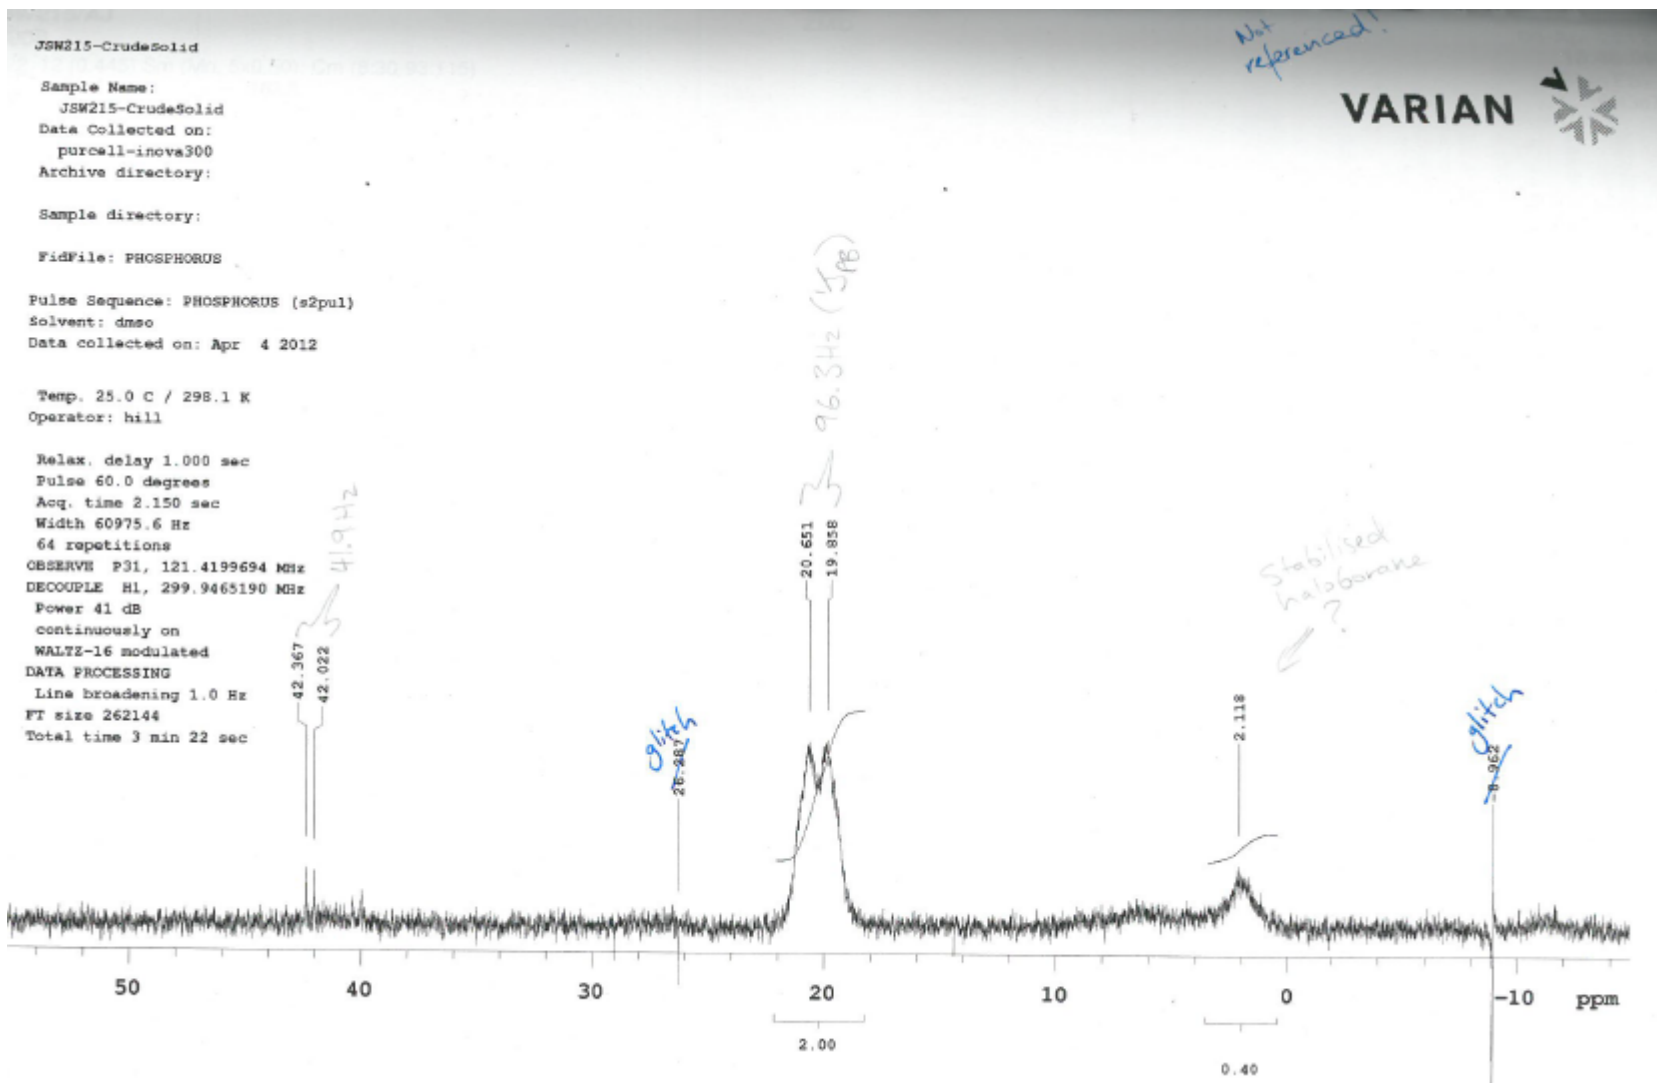

Compound 9 –  $^{31}\text{P}\{^1\text{H}\}$  NMR spectrum

JSM322-Precipitate

Sample Name:  
JSM322-Precipitate  
Data Collected on:  
purcell-ineva300  
Archive directory:

Sample directory:

FidFile: stdlh

Pulse Sequence: stdlh (s2pul)  
Solvent: cdcl3  
Data collected on: Jul 1 2013

Temp. 25.0 C / 298.1 K  
Operator: hill

Relax. delay 0.100 sec  
Pulse 75.0 degrees  
Acq. time 0.273 sec  
Width 60015.0 Hz  
928 repetitions  
OBSERVE B11, 96.2339197 MHz  
DECOUPLE H1, 299.9450942 MHz  
Power 43 dB  
continuously on  
MALTZ-16 modulated  
DATA PROCESSING  
Line broadening 3.0 Hz  
FT size 32768  
Total time 12 min

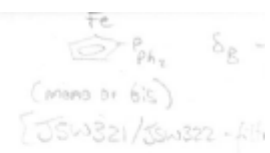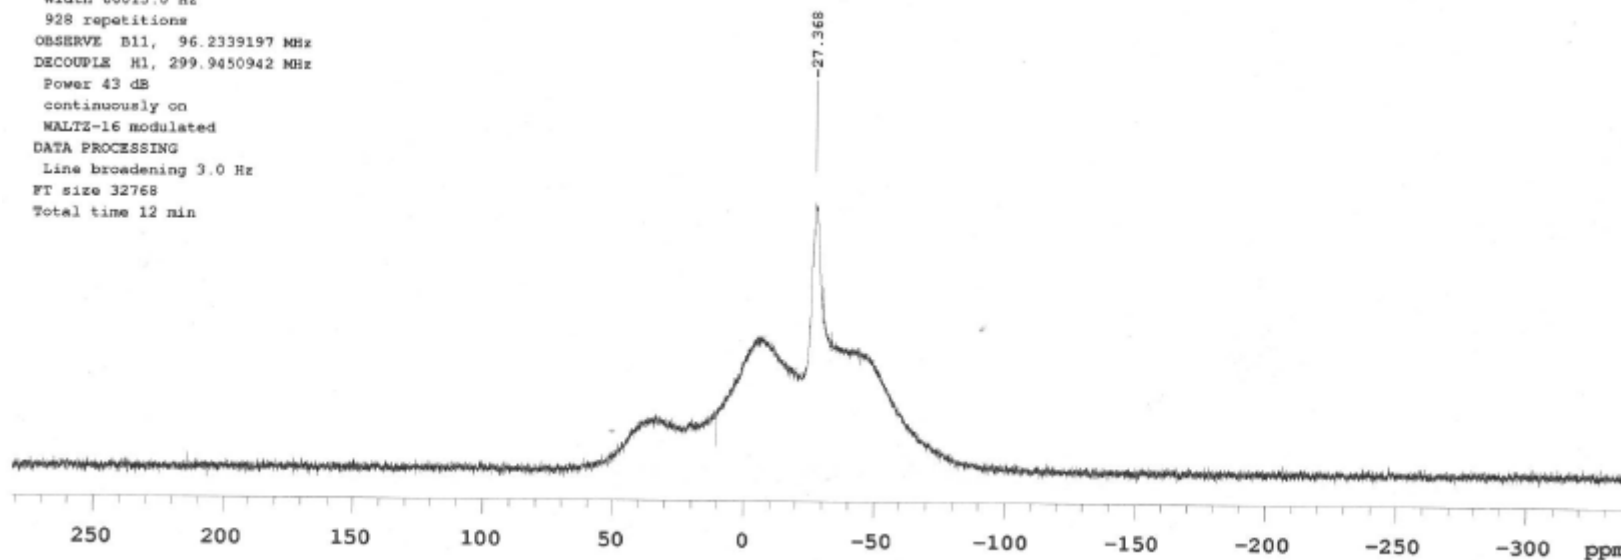

Compound 10 - <sup>11</sup>B{<sup>1</sup>H} NMR spectrum

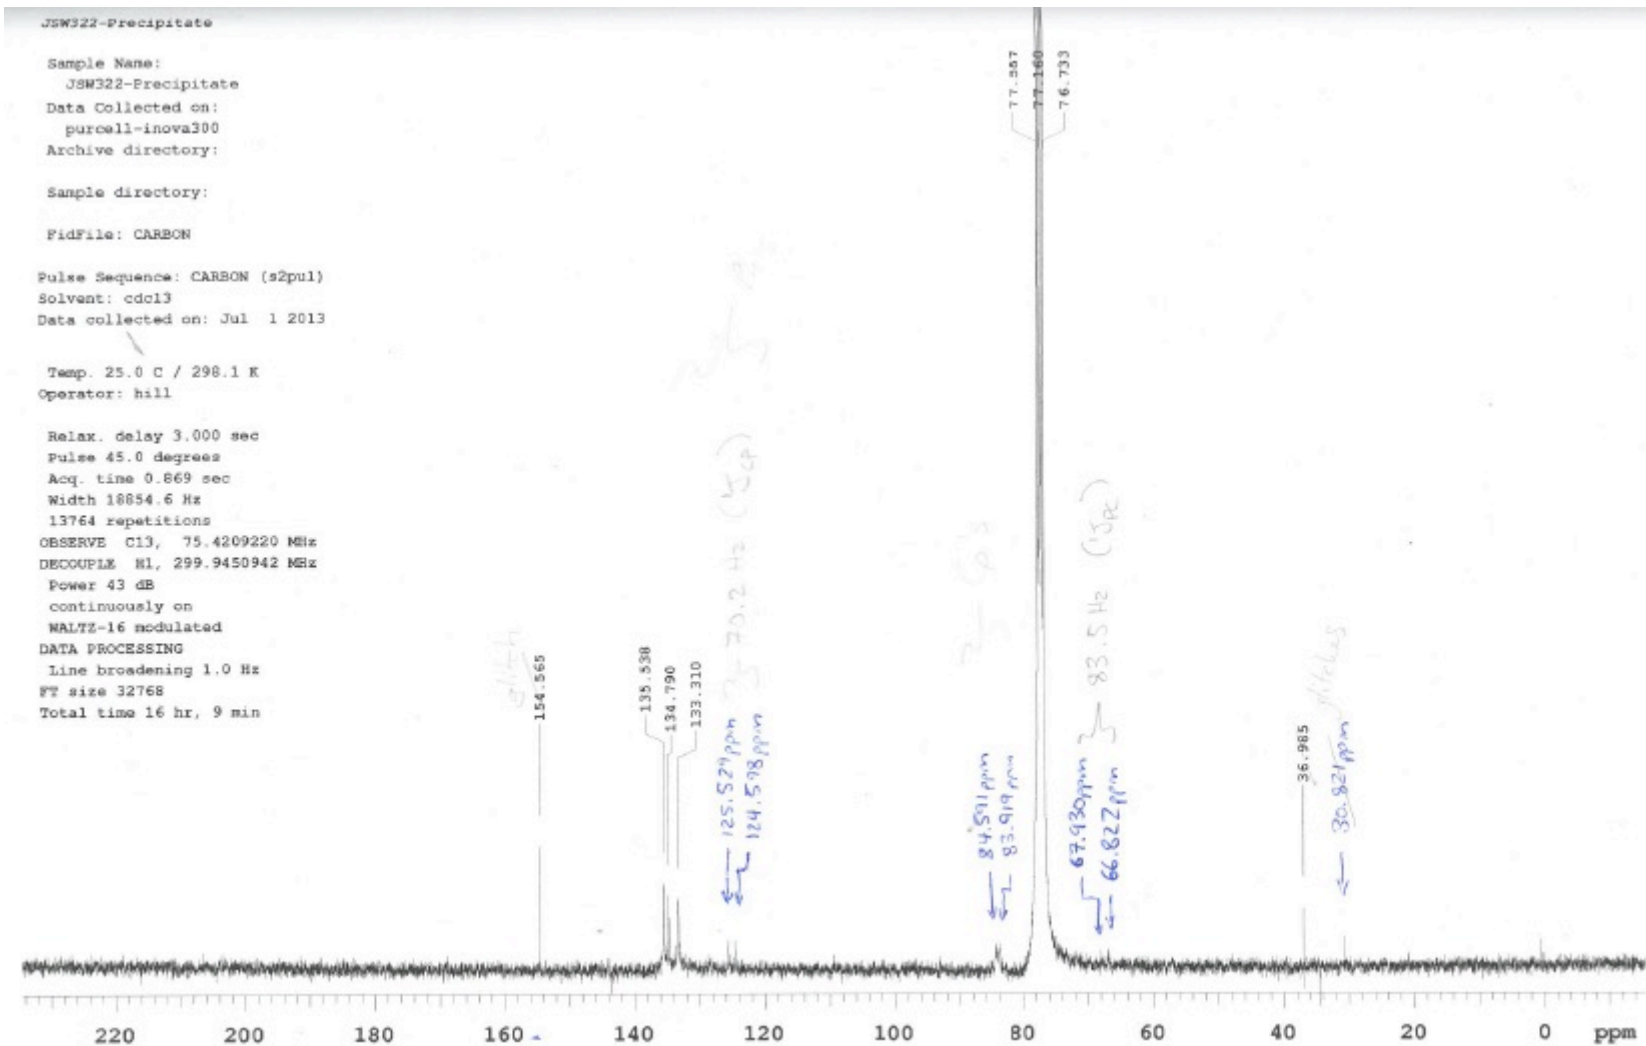

Compound 10 –  $^{13}\text{C}\{^1\text{H}\}$  NMR spectrum



JSW322-Precipitate

Sample Name:  
JSW322-Precipitate  
Data Collected on:  
purcell-inova300  
Archive directory:

Sample directory:

FidFile: PHOSPHORUS

Pulse Sequence: PHOSPHORUS (s2pul)  
Solvent: cdcl3  
Data collected on: Jul 1 2013

Temp. 25.0 C / 298.1 K  
Operator: hill

Relax. delay 1.000 sec  
Pulse 60.0 degrees  
Acq. time 0.893 sec  
Width 36680.4 Hz  
296 repetitions  
OBSERVE F31, 121.4192923 MHz  
DECOUPLE H1, 299.9450942 MHz  
Power 43 dB  
continuously on  
WALTZ-16 modulated  
DATA PROCESSING  
Line broadening 1.0 Hz  
FT size 65536  
Total time 25 min

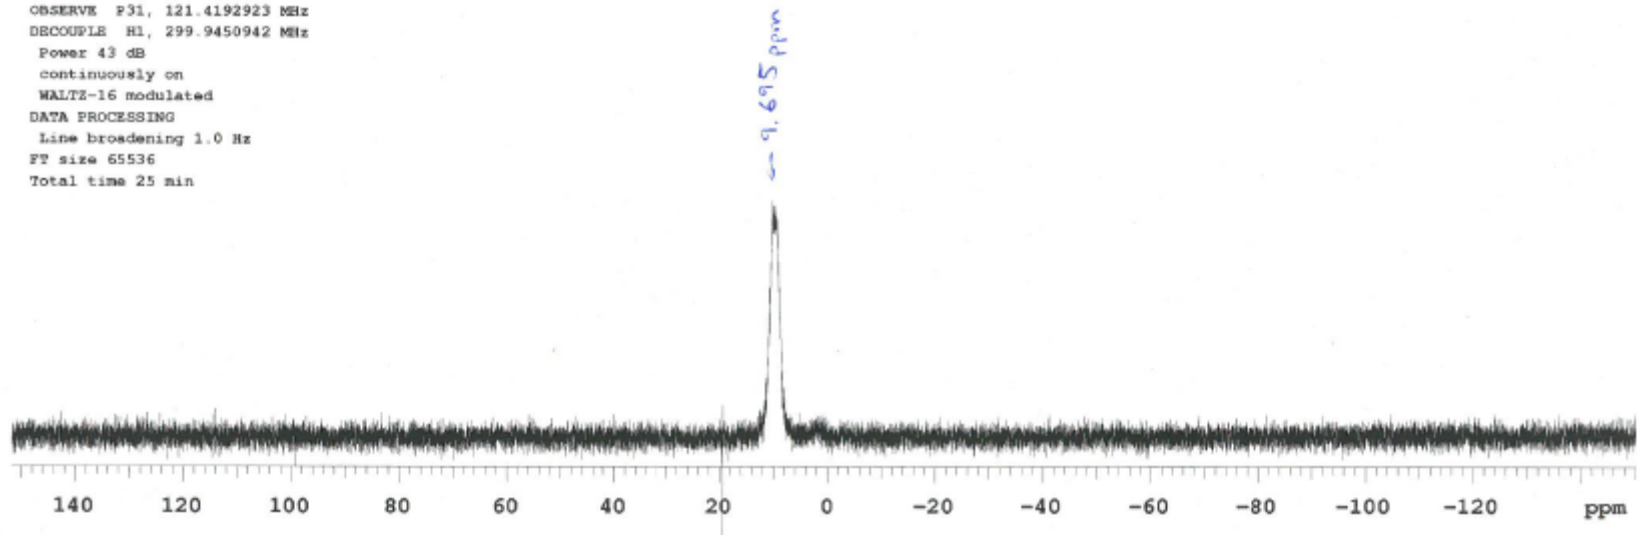

Compound 10 –  $^{31}\text{P}\{^1\text{H}\}$  NMR spectrum

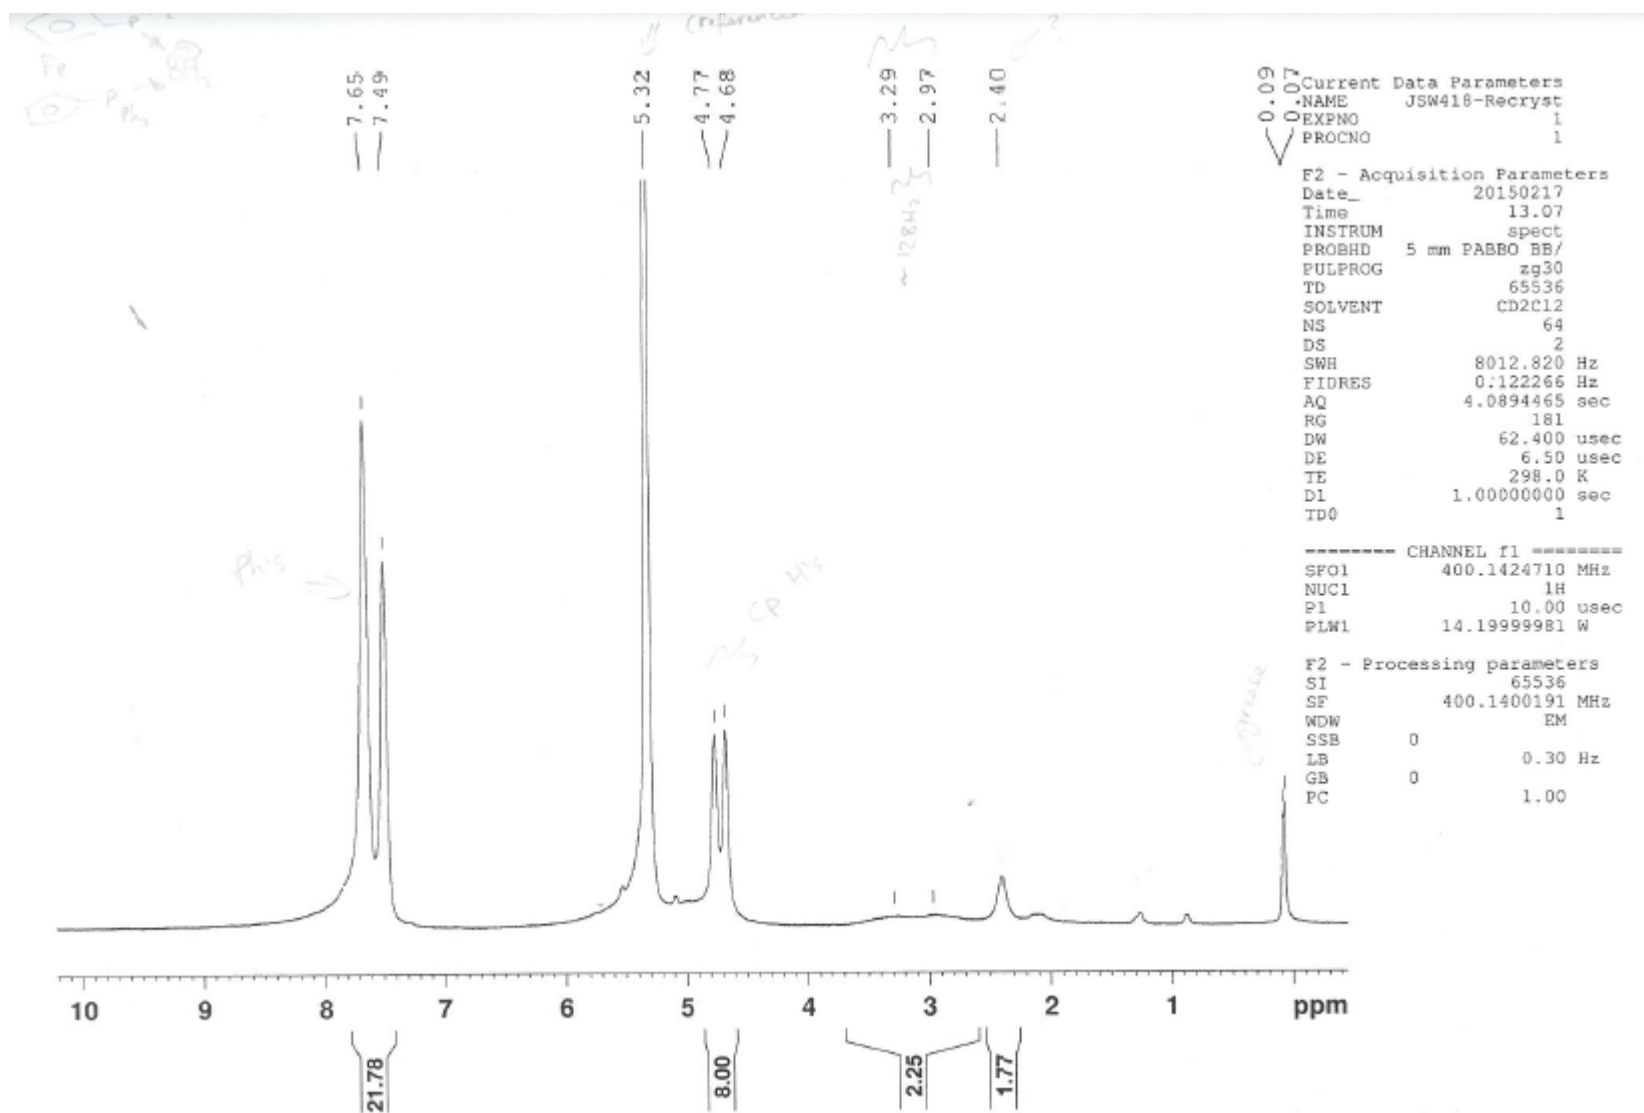

Compound 11 -  $^1\text{H}$  NMR spectrum

---28.07

Current Data Parameters  
NAME JSW418-Recryst  
EXPNO 3  
PROCNO 1

F2 - Acquisition Parameters  
Date\_ 20150217  
Time 13.21  
INSTRUM spect  
PROBHD 5 mm PABBO BB/  
PULPROG zg  
TD 65536  
SOLVENT CD2Cl2  
NS 200  
DS 4  
SWH 25510.203 Hz  
FIDRES 0.389255 Hz  
AQ 1.2845056 sec  
RG 203  
DW 19.600 usec  
DE 6.50 usec  
TE 298.0 K  
D1 0.20000000 sec  
TD0 1

==== CHANNEL f1 =====  
SF01 128.3808136 MHz  
NUC1 11B  
P1 9.00 usec  
PLW1 63.97299957 W

F2 - Processing parameters  
SI 32768  
SF 128.3808140 MHz  
WDW EM  
SSB 0  
LB 1.00 Hz  
GB 0  
PC 1.40

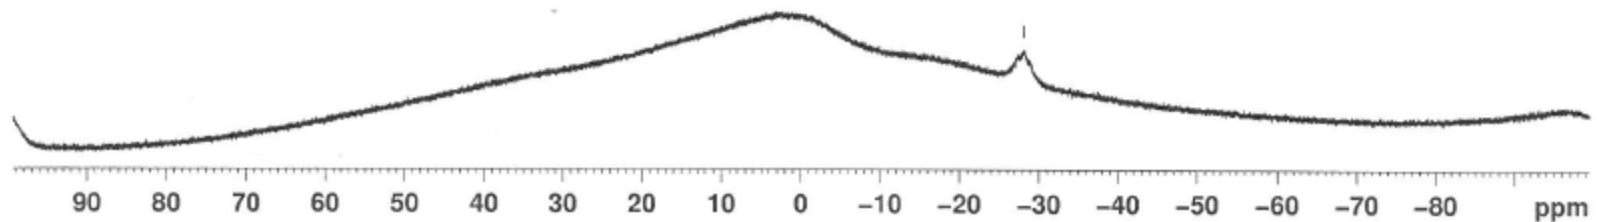

Compound 11 -  $^{11}\text{B}\{^1\text{H}\}$  NMR spectrum

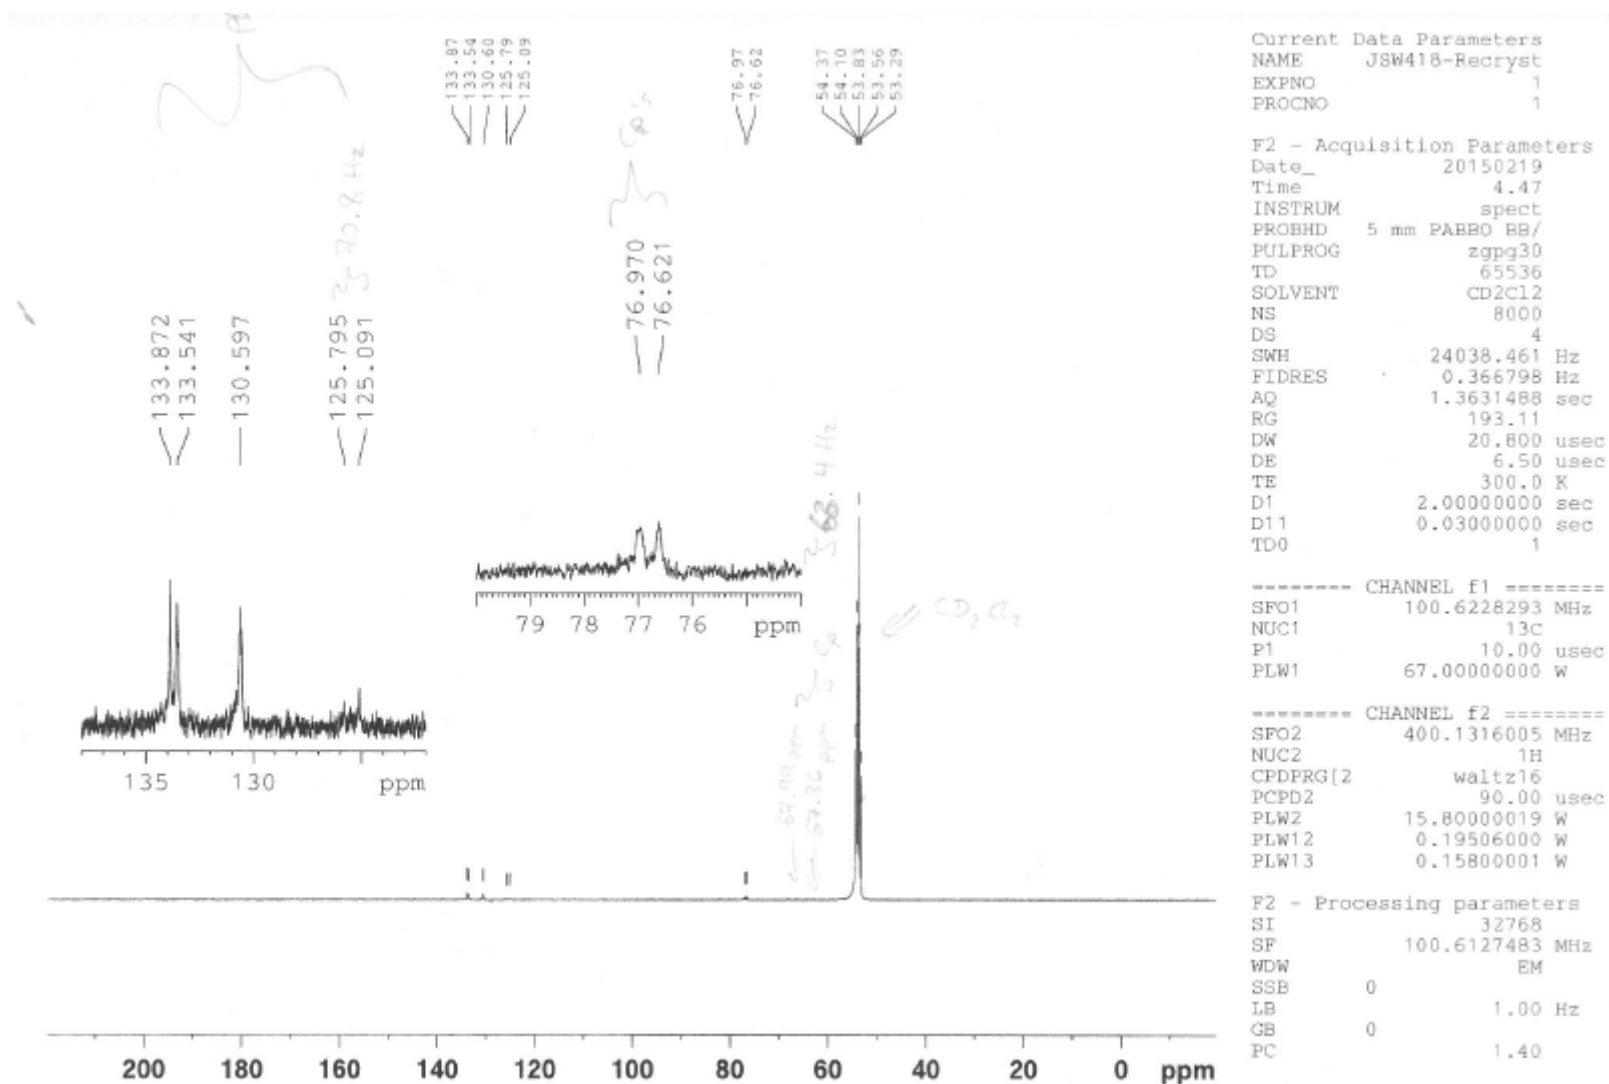

Compound 11 -  $^{13}\text{C}\{^1\text{H}\}$  NMR spectrum

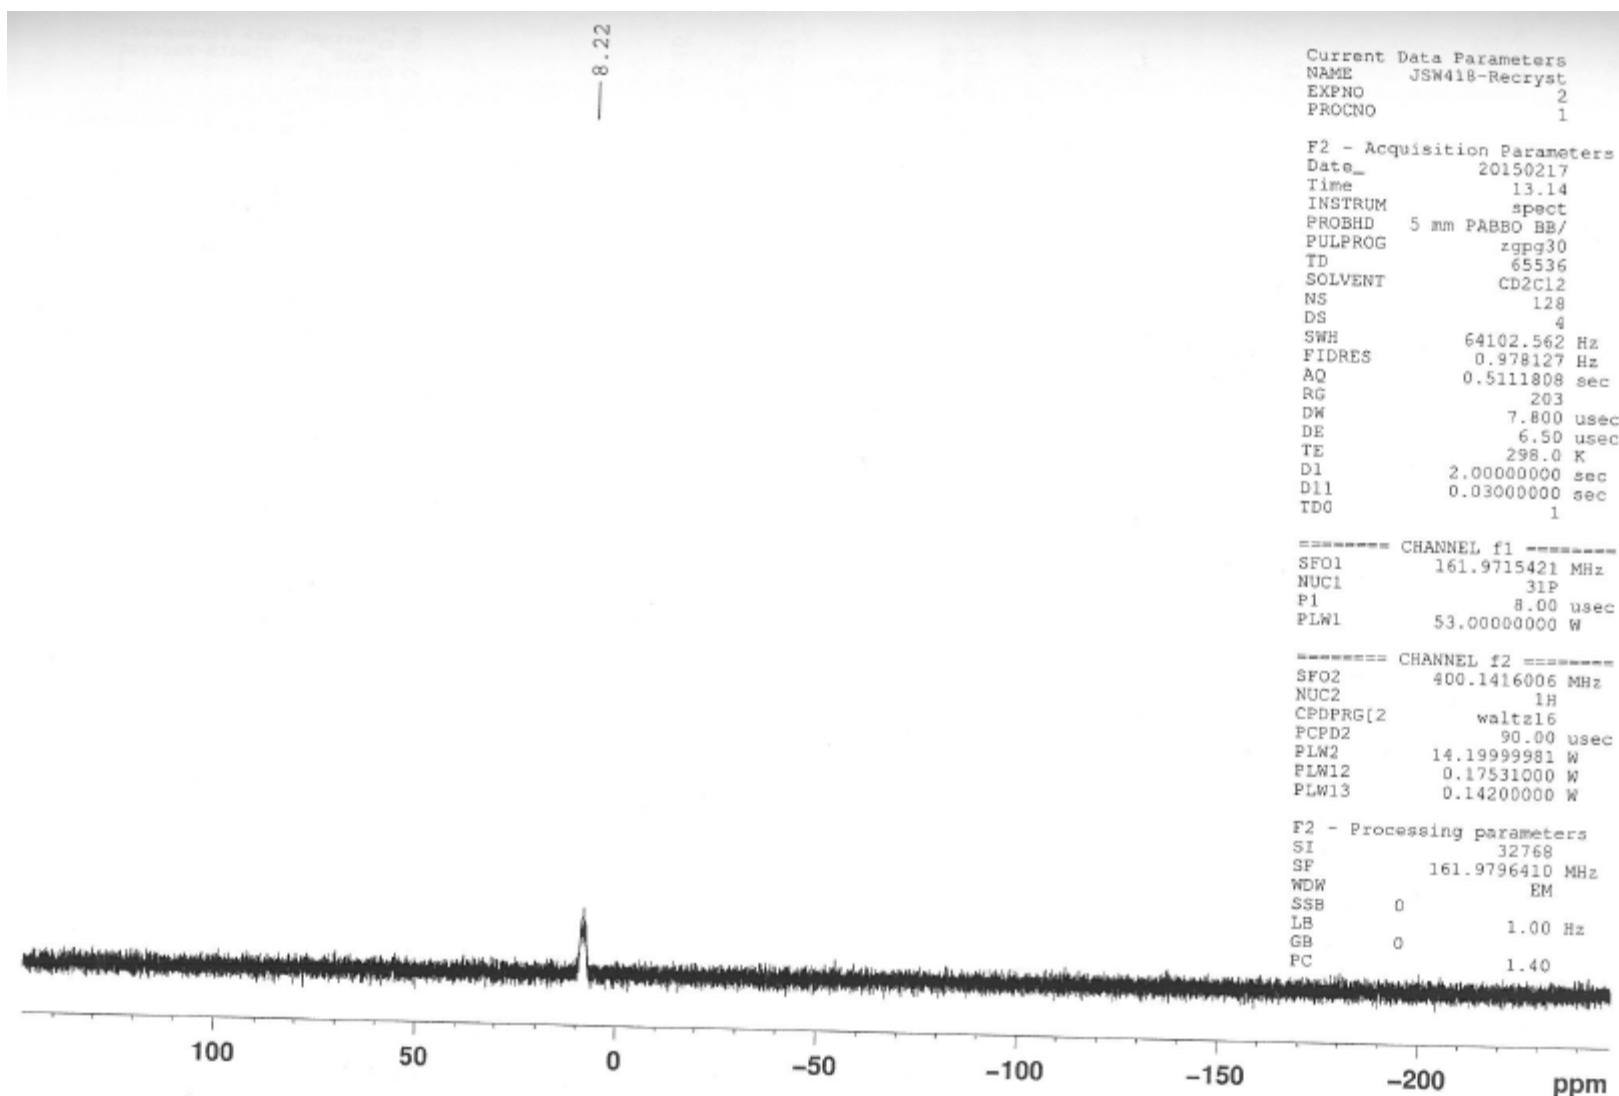

Compound 11 –  $^{31}\text{P}\{^1\text{H}\}$  NMR spectrum

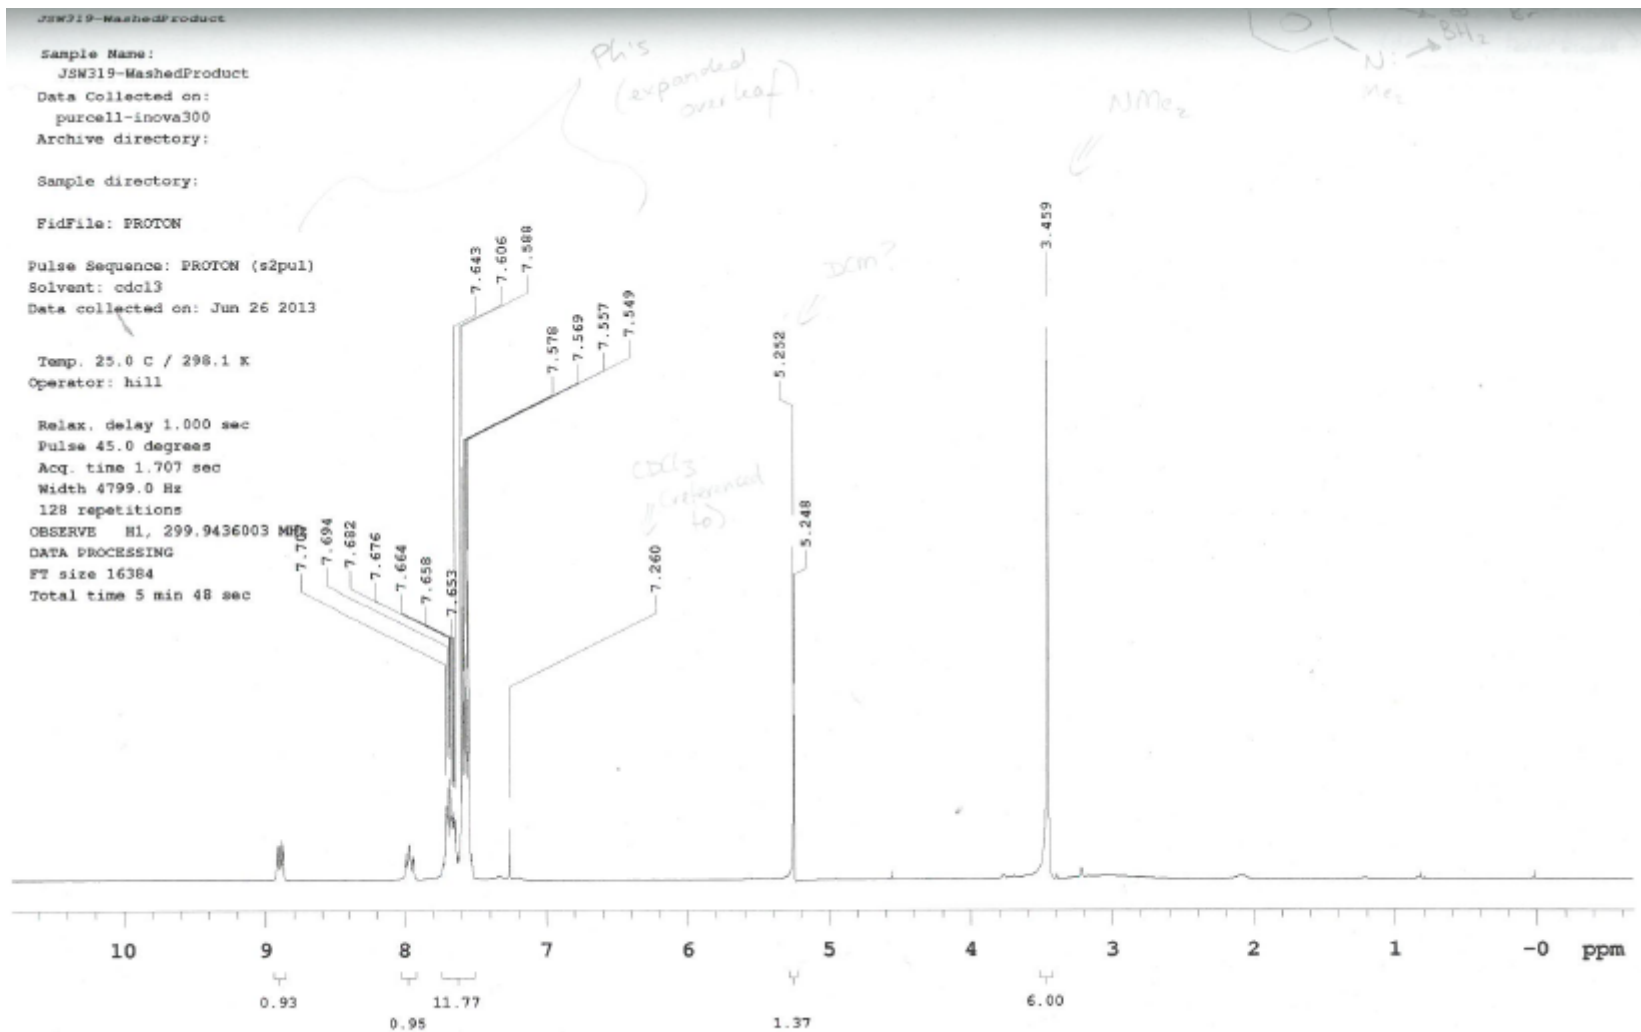

Compound 12 - <sup>1</sup>H NMR spectrum

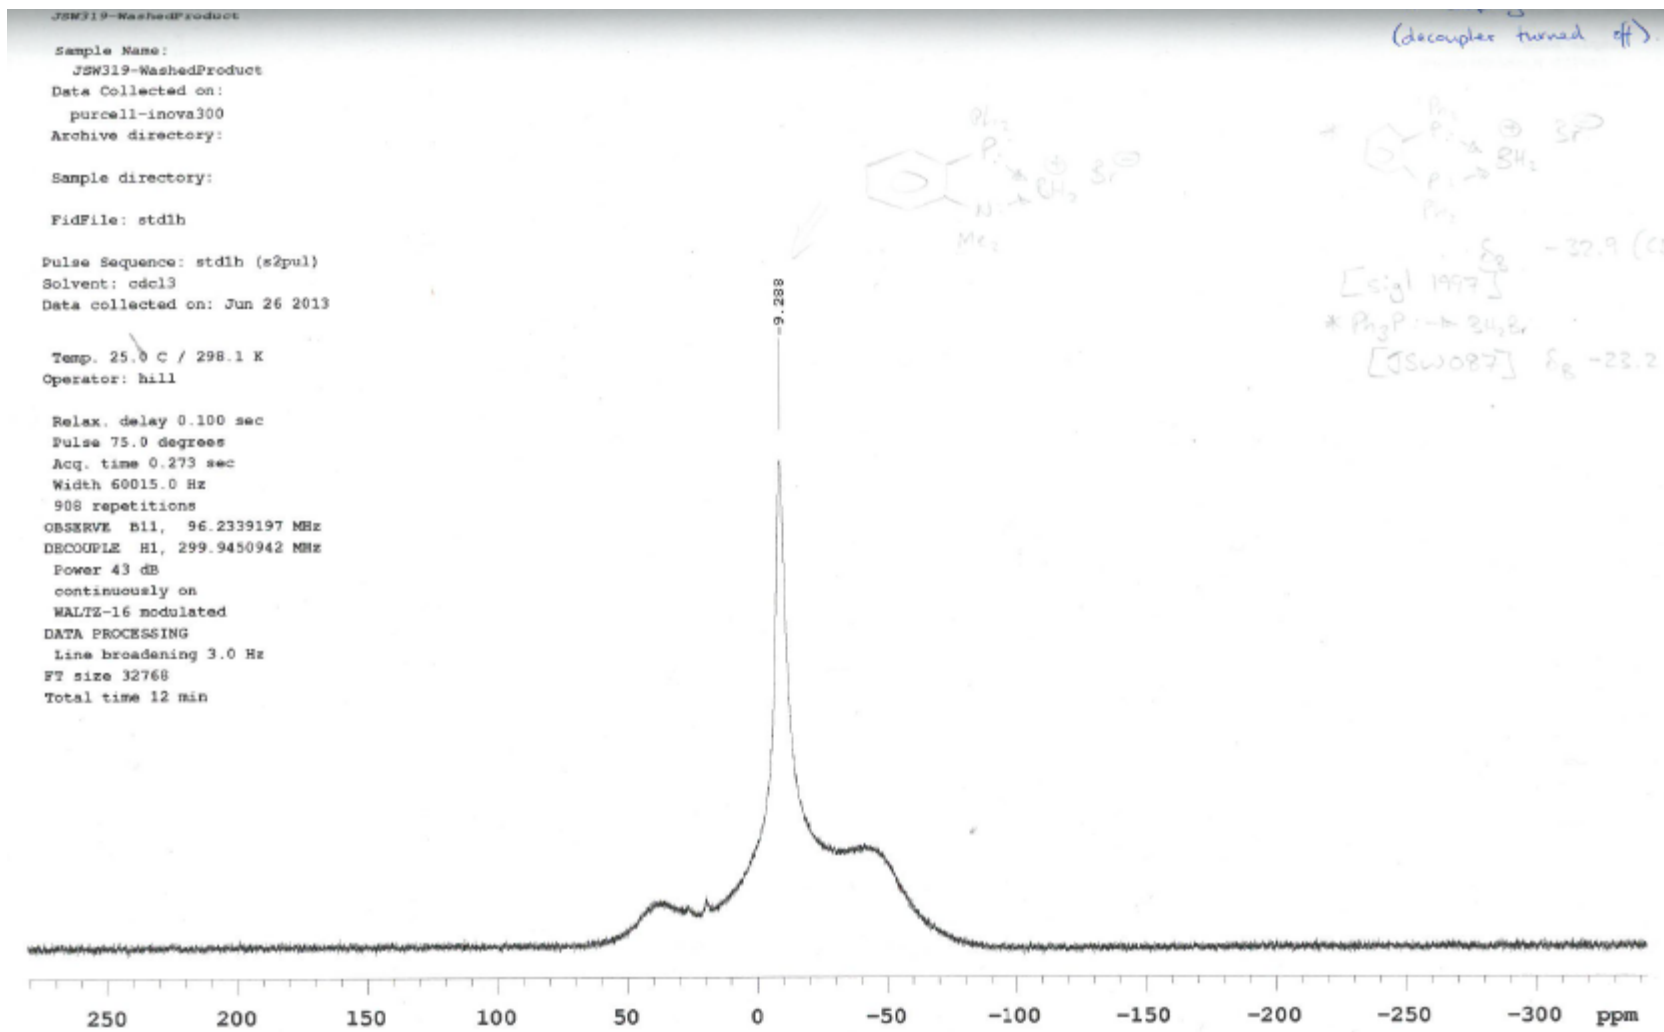

Compound 12 –  $^{11}\text{B}\{^1\text{H}\}$  NMR spectrum

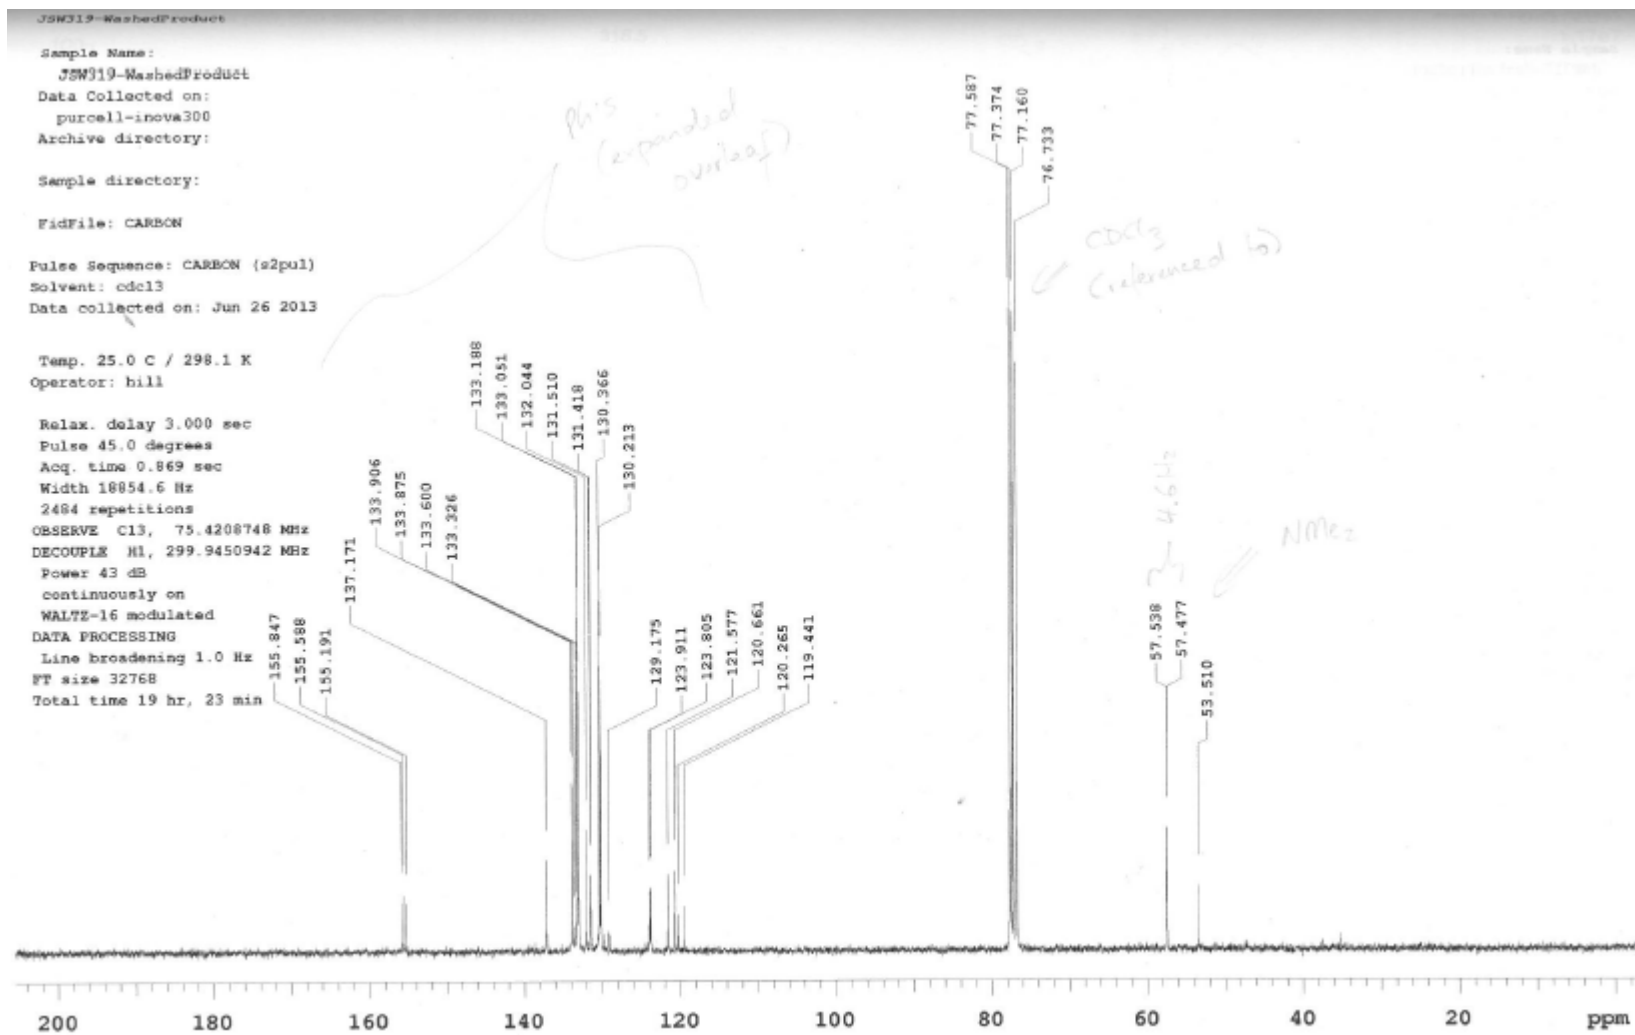

Compound 12 -  $^{13}\text{C}\{^1\text{H}\}$  NMR spectrum



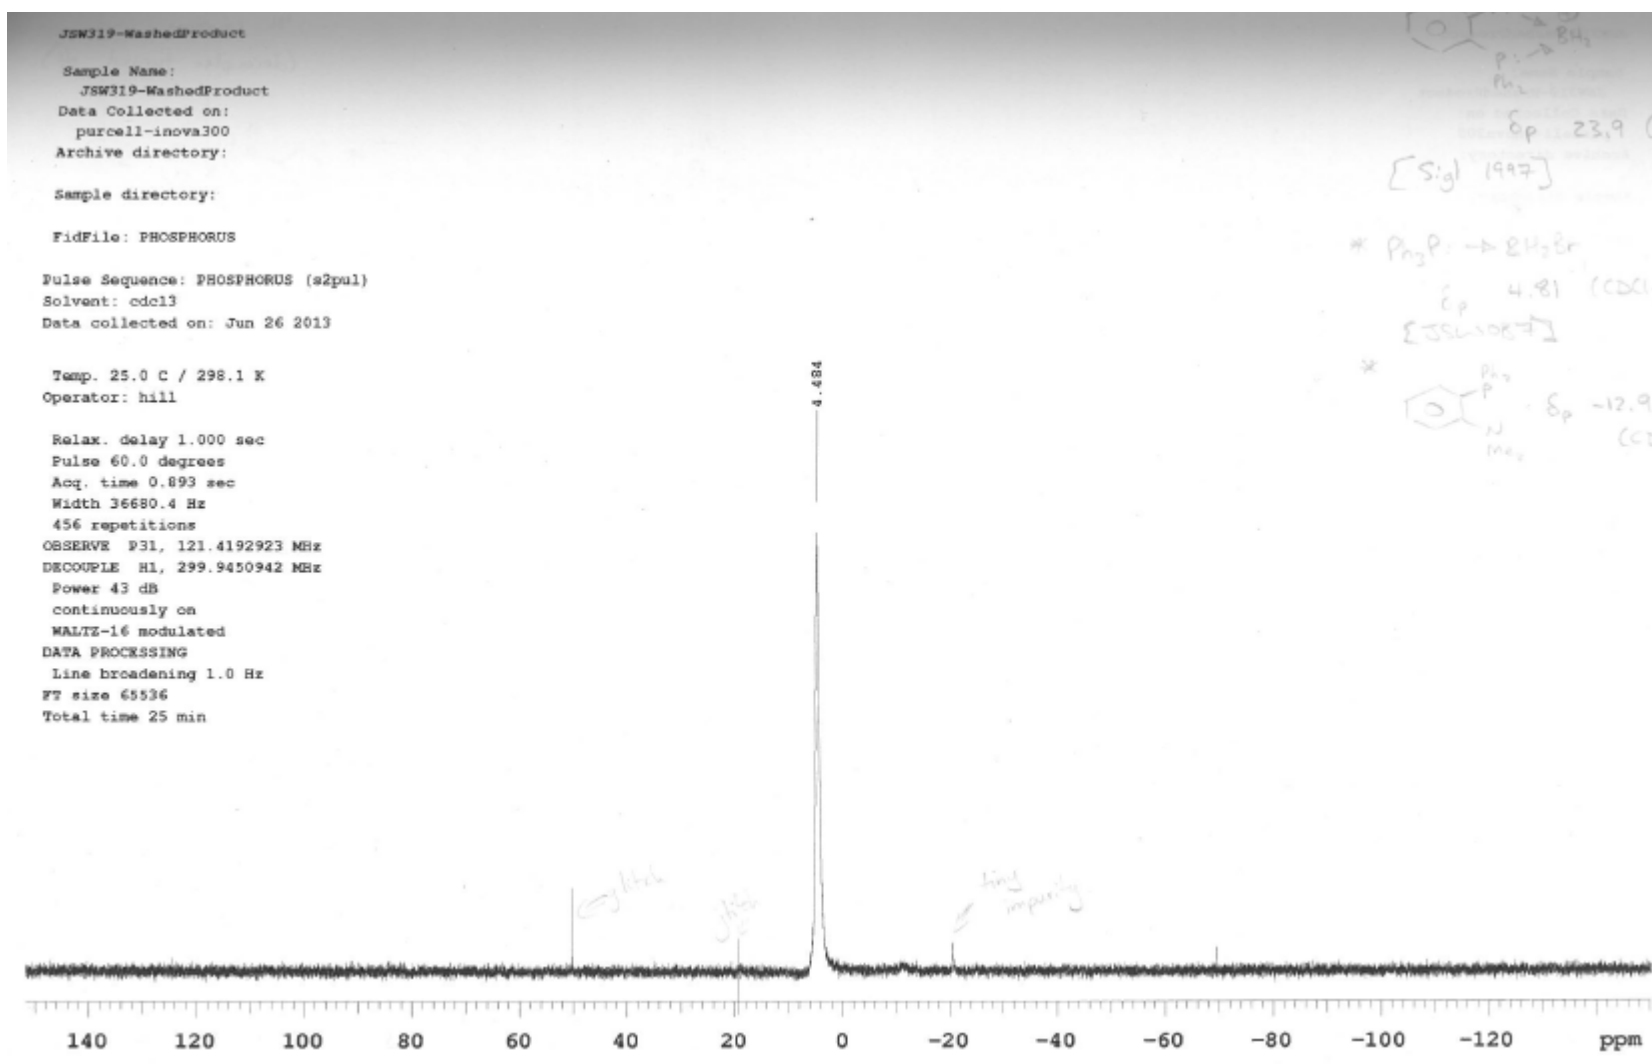

Compound 12 -  $^{31}\text{P}\{^1\text{H}\}$  NMR spectrum

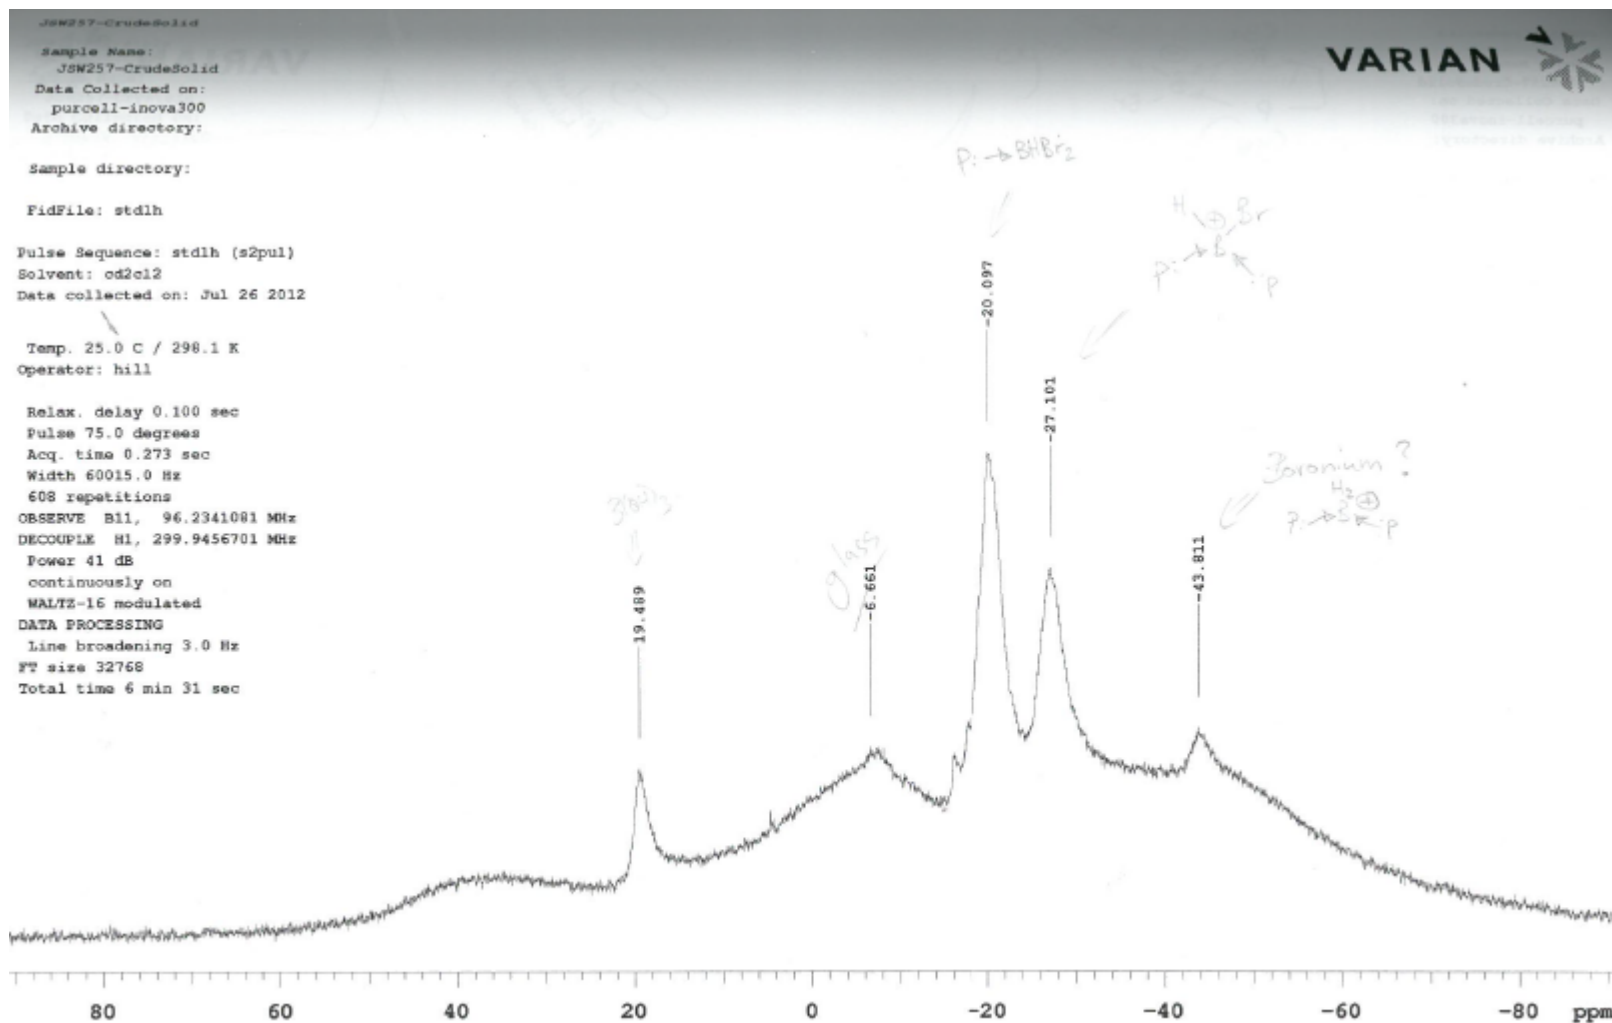

Compound 13 –  $^{11}\text{B}\{^1\text{H}\}$  NMR spectrum

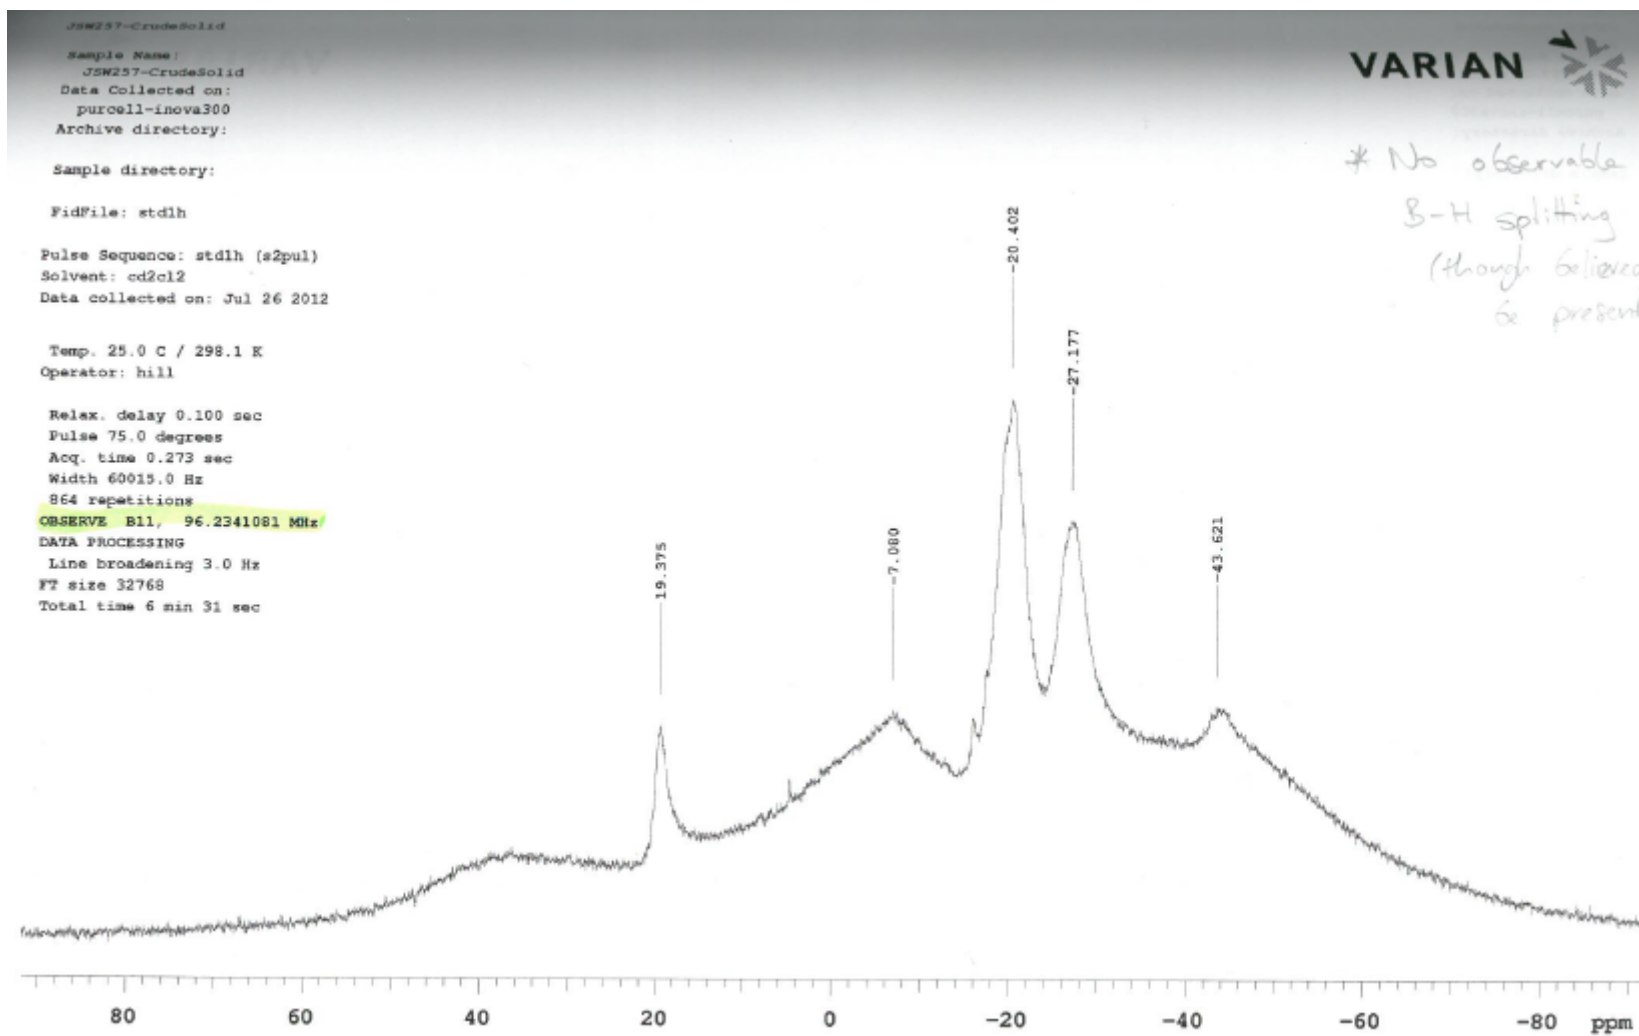

Compound 13 -  $^{11}\text{B}$  NMR spectrum

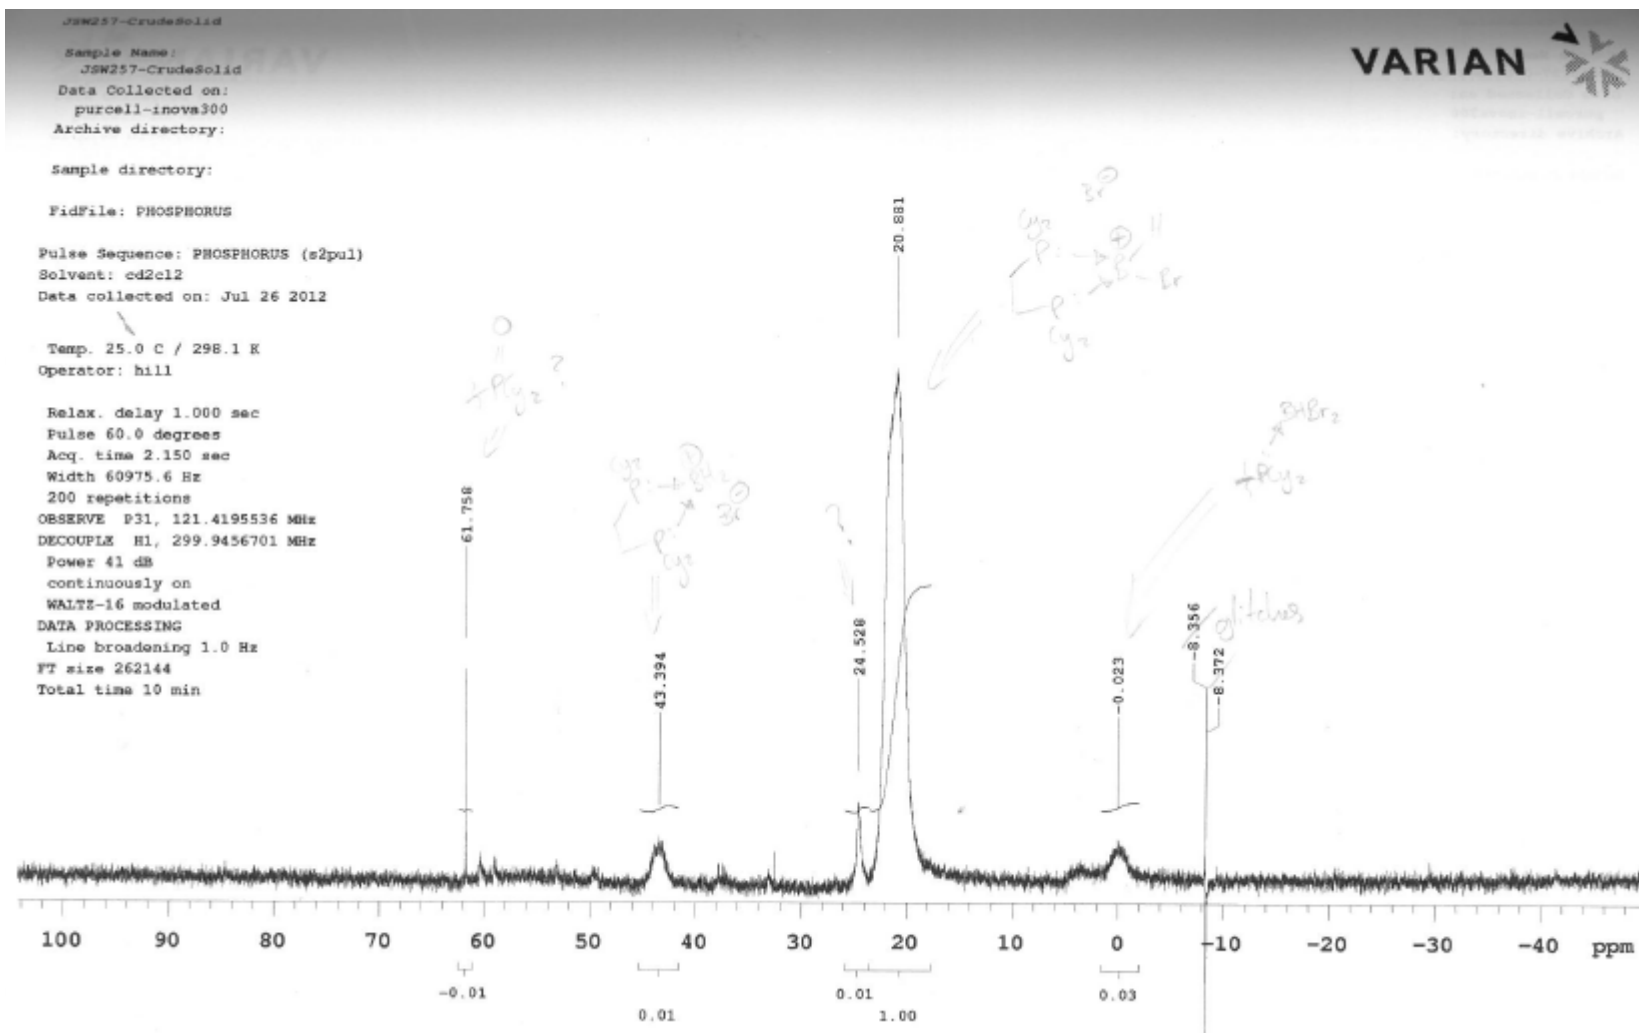

Compound 13 –  $^{31}\text{P}\{^1\text{H}\}$  NMR spectrum

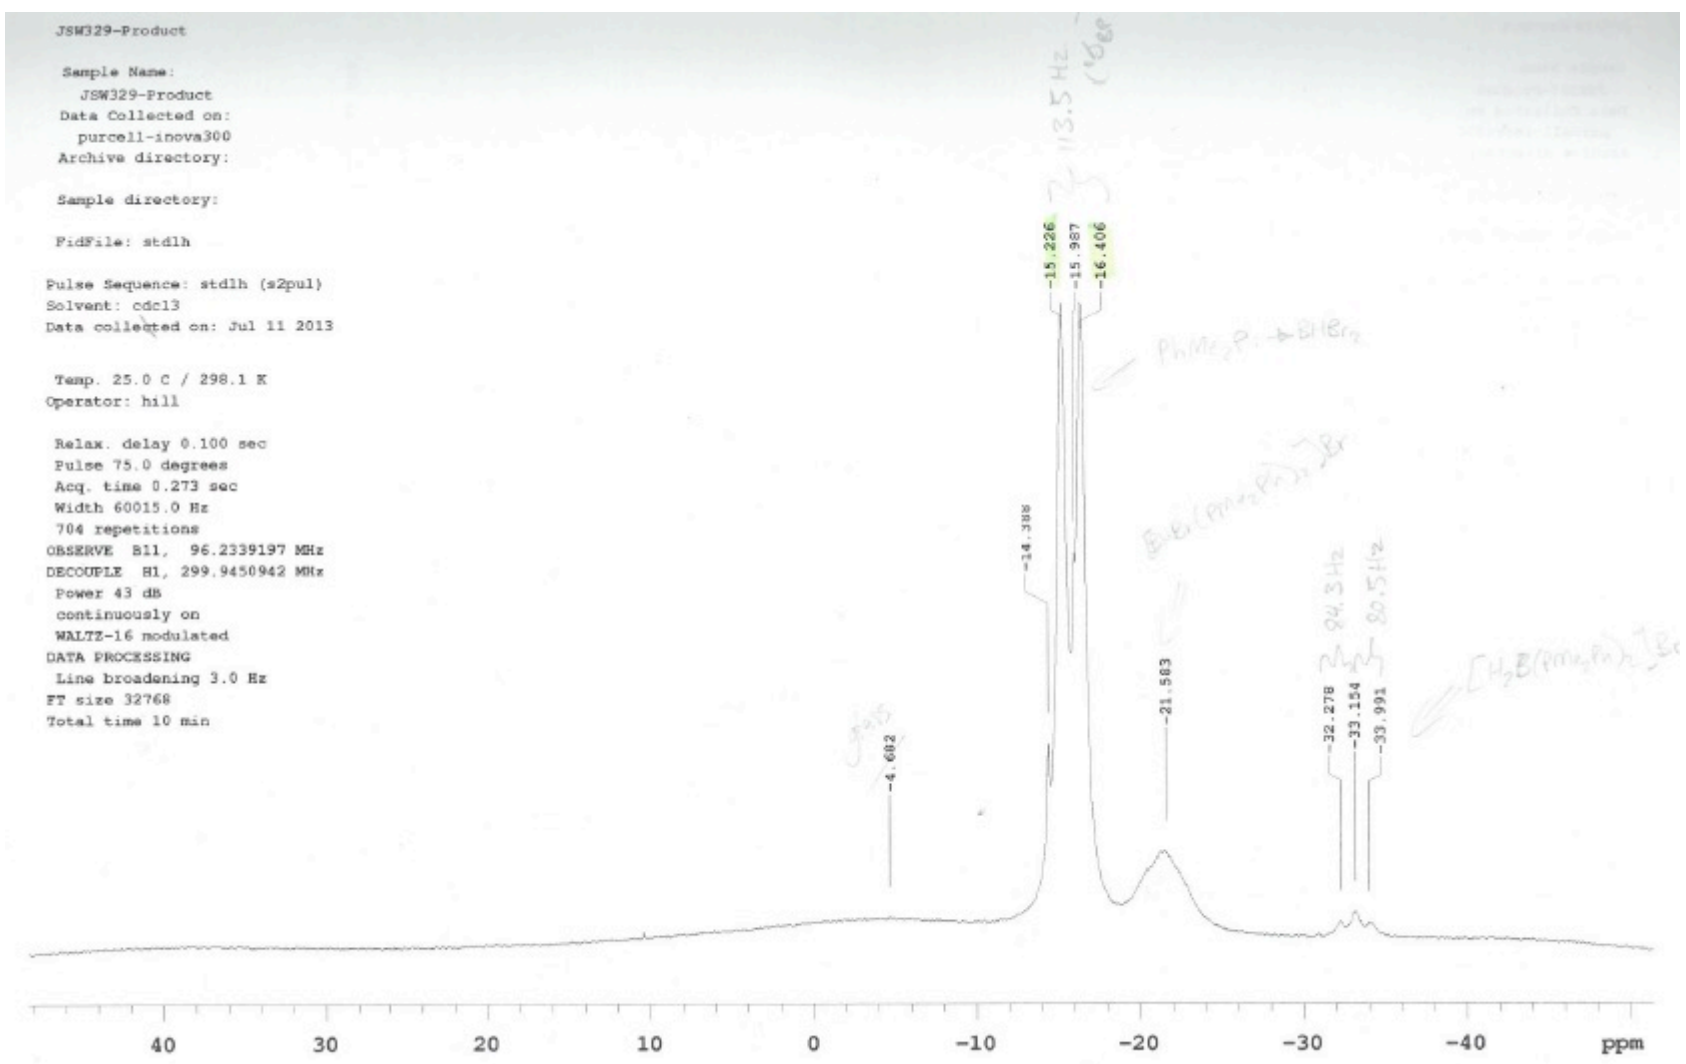

Compound 14 – <sup>11</sup>B{<sup>1</sup>H} NMR spectrum

JSM329-Product

Sample Name:  
JSM329-Product  
Data Collected on:  
purcell-inova300  
Archive directory:

Sample directory:

FidFile: PHOSPHORUS

Pulse Sequence: PHOSPHORUS (s2pul)  
Solvent: cdcl3  
Data collected on: Jul 11 2013

Temp. 25.0 c / 298.1 K  
Operator: hill

Relax. delay 1.000 sec  
Pulse 60.0 degrees  
Acq. time 0.893 sec  
Width 36680.4 Hz  
264 repetitions  
OBSERVE F31, 121.4192923 MHz  
DECOUPLE H1, 299.9450942 MHz  
Power 43 dB  
continuously on  
WALTZ-16 modulated  
DATA PROCESSING  
Line broadening 1.0 Hz  
FT size 65536  
Total time 12 min

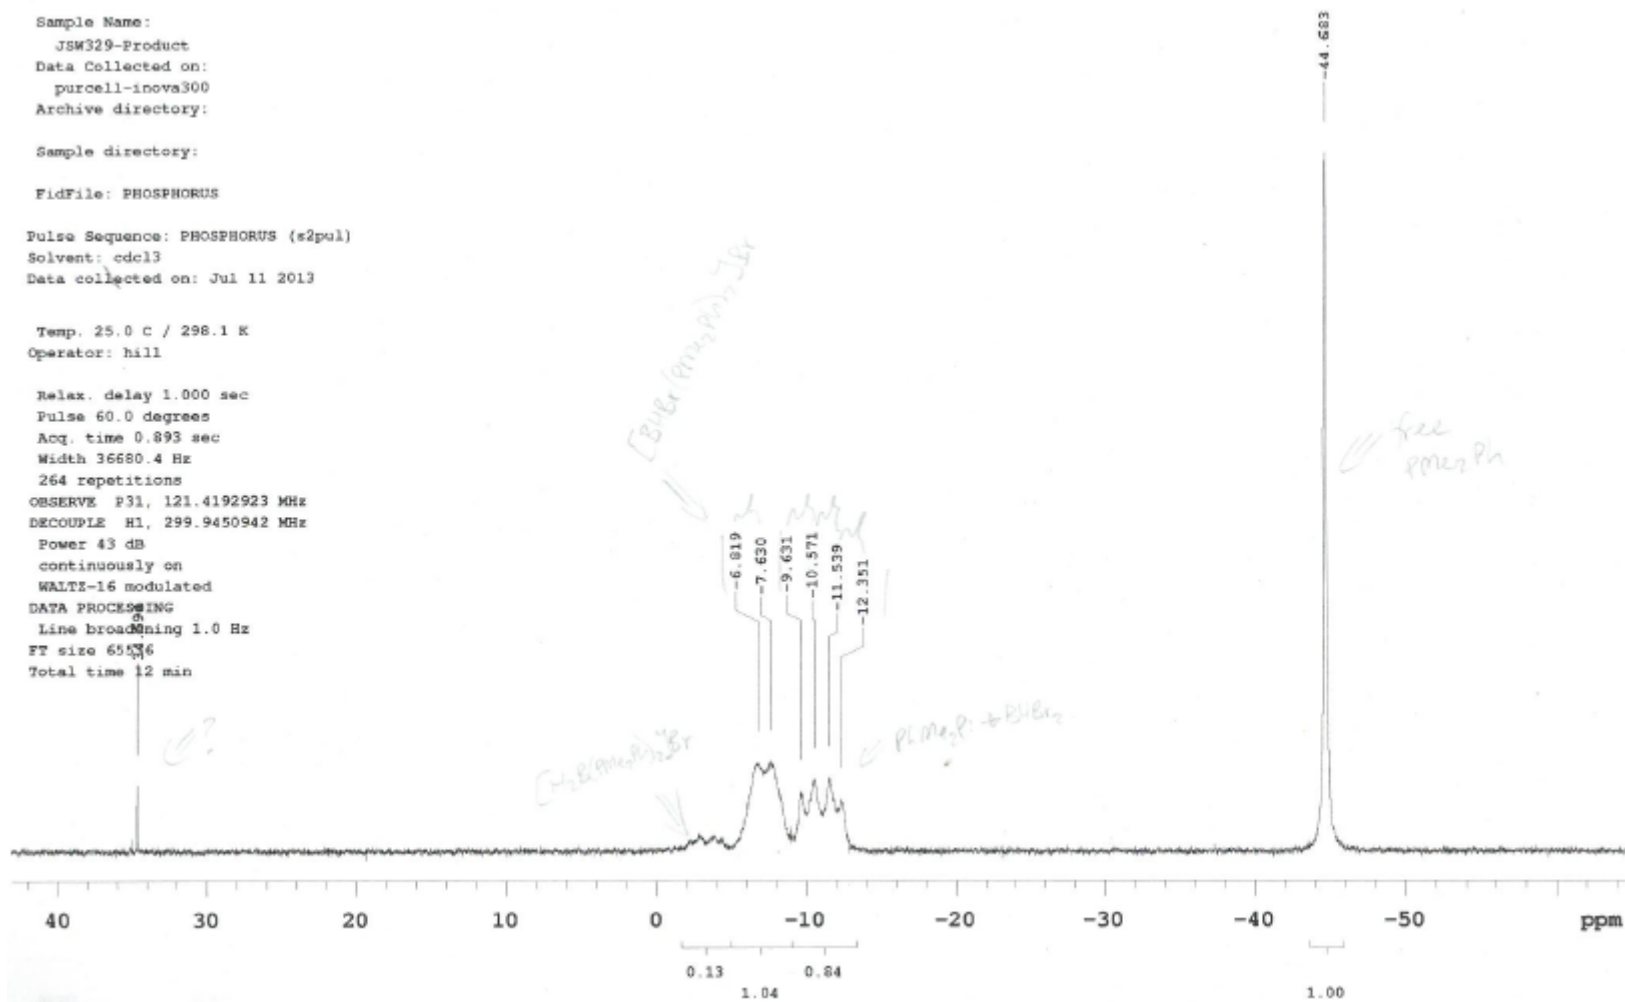

Compound 14 -  $^{31}\text{P}\{^1\text{H}\}$  NMR spectrum

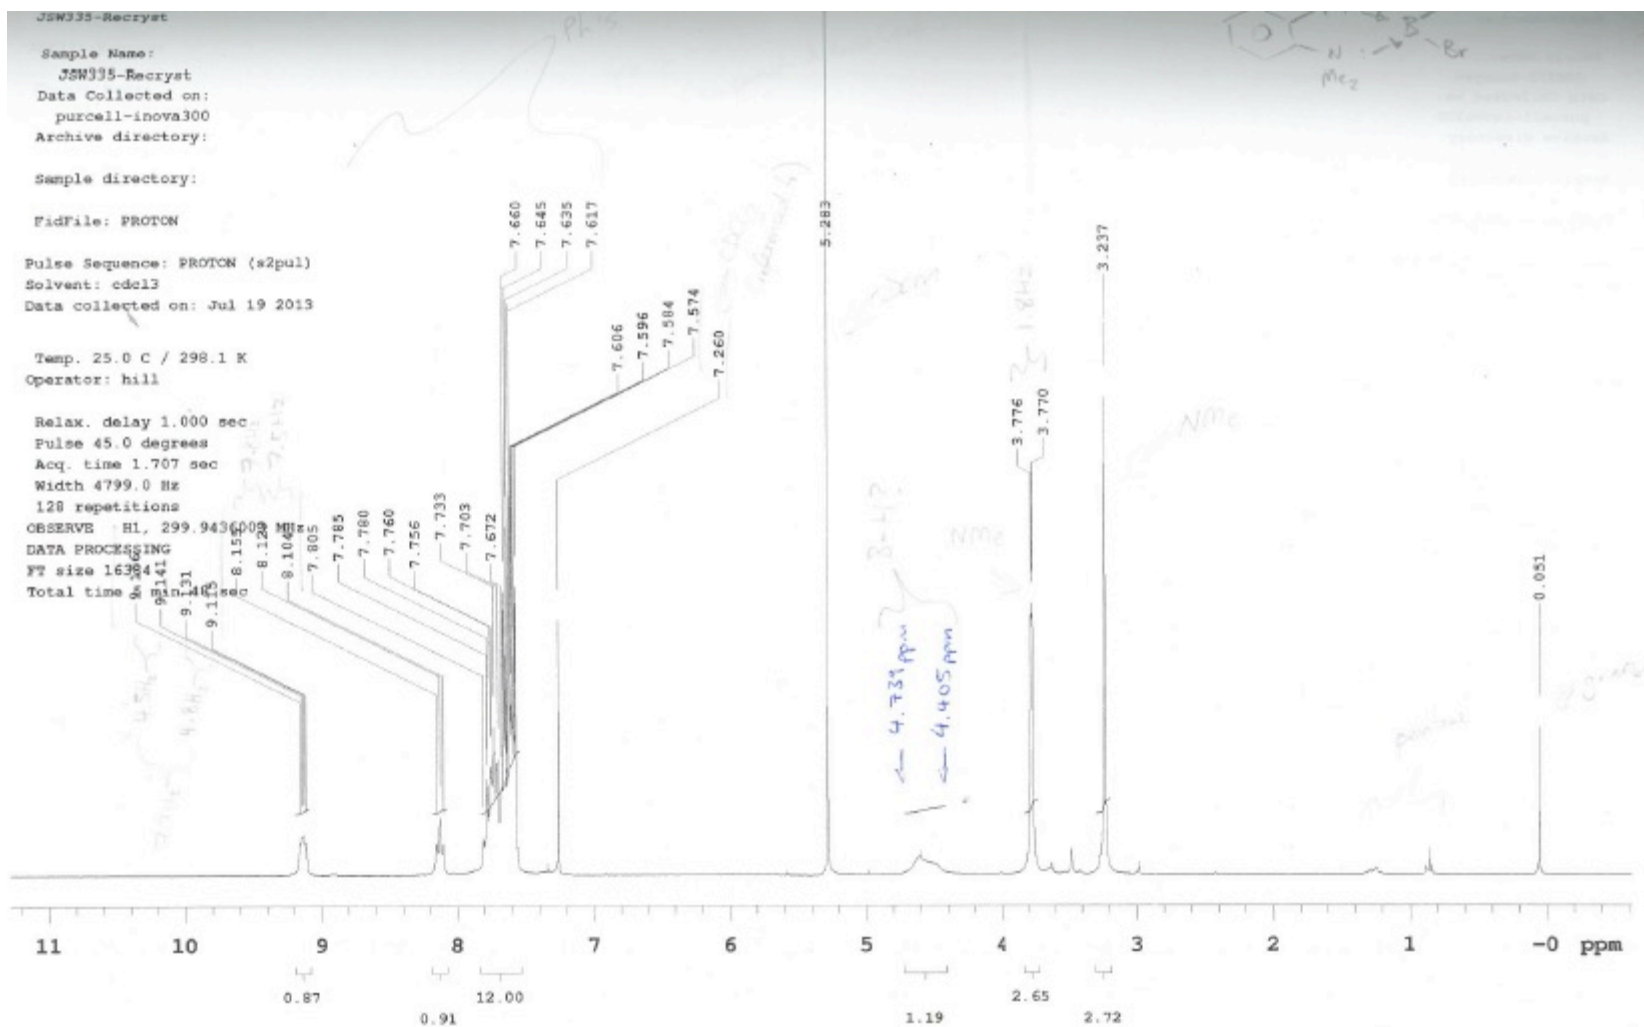

Compound 15 –  $^1\text{H}$  NMR spectrum

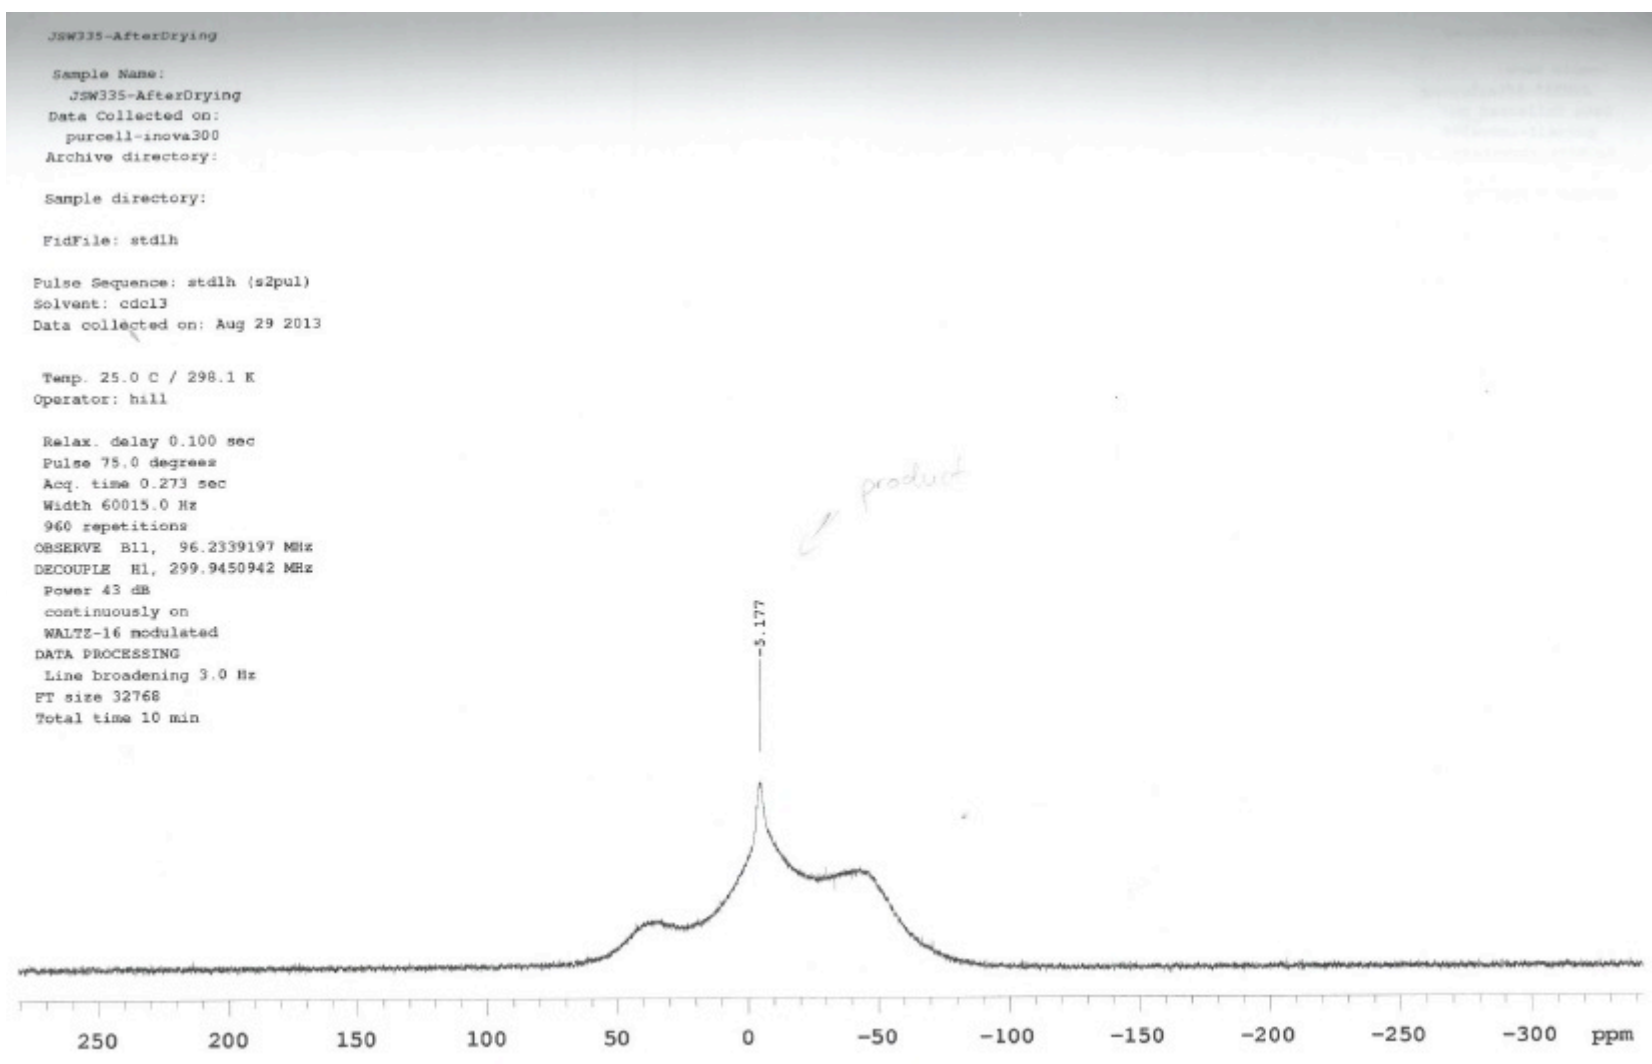

Compound 15 –  $^{11}\text{B}\{^1\text{H}\}$  NMR spectrum



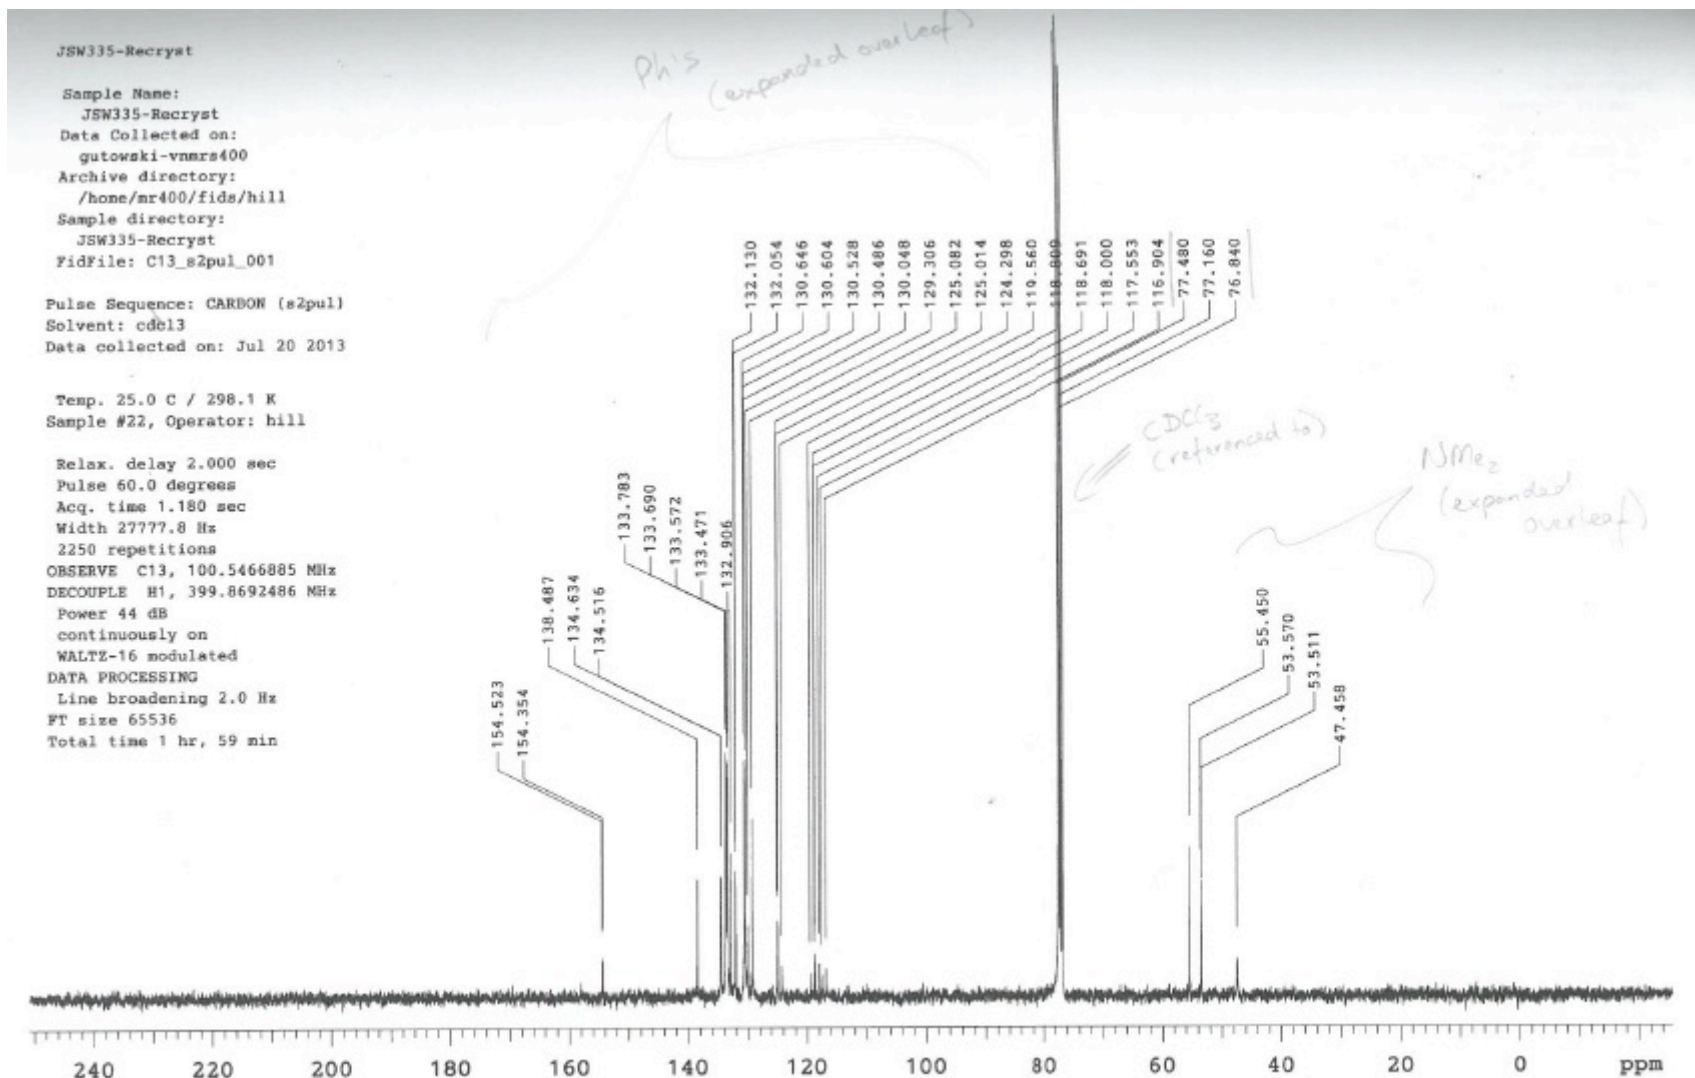

Compound 15 –  $^{13}\text{C}\{^1\text{H}\}$  NMR spectrum

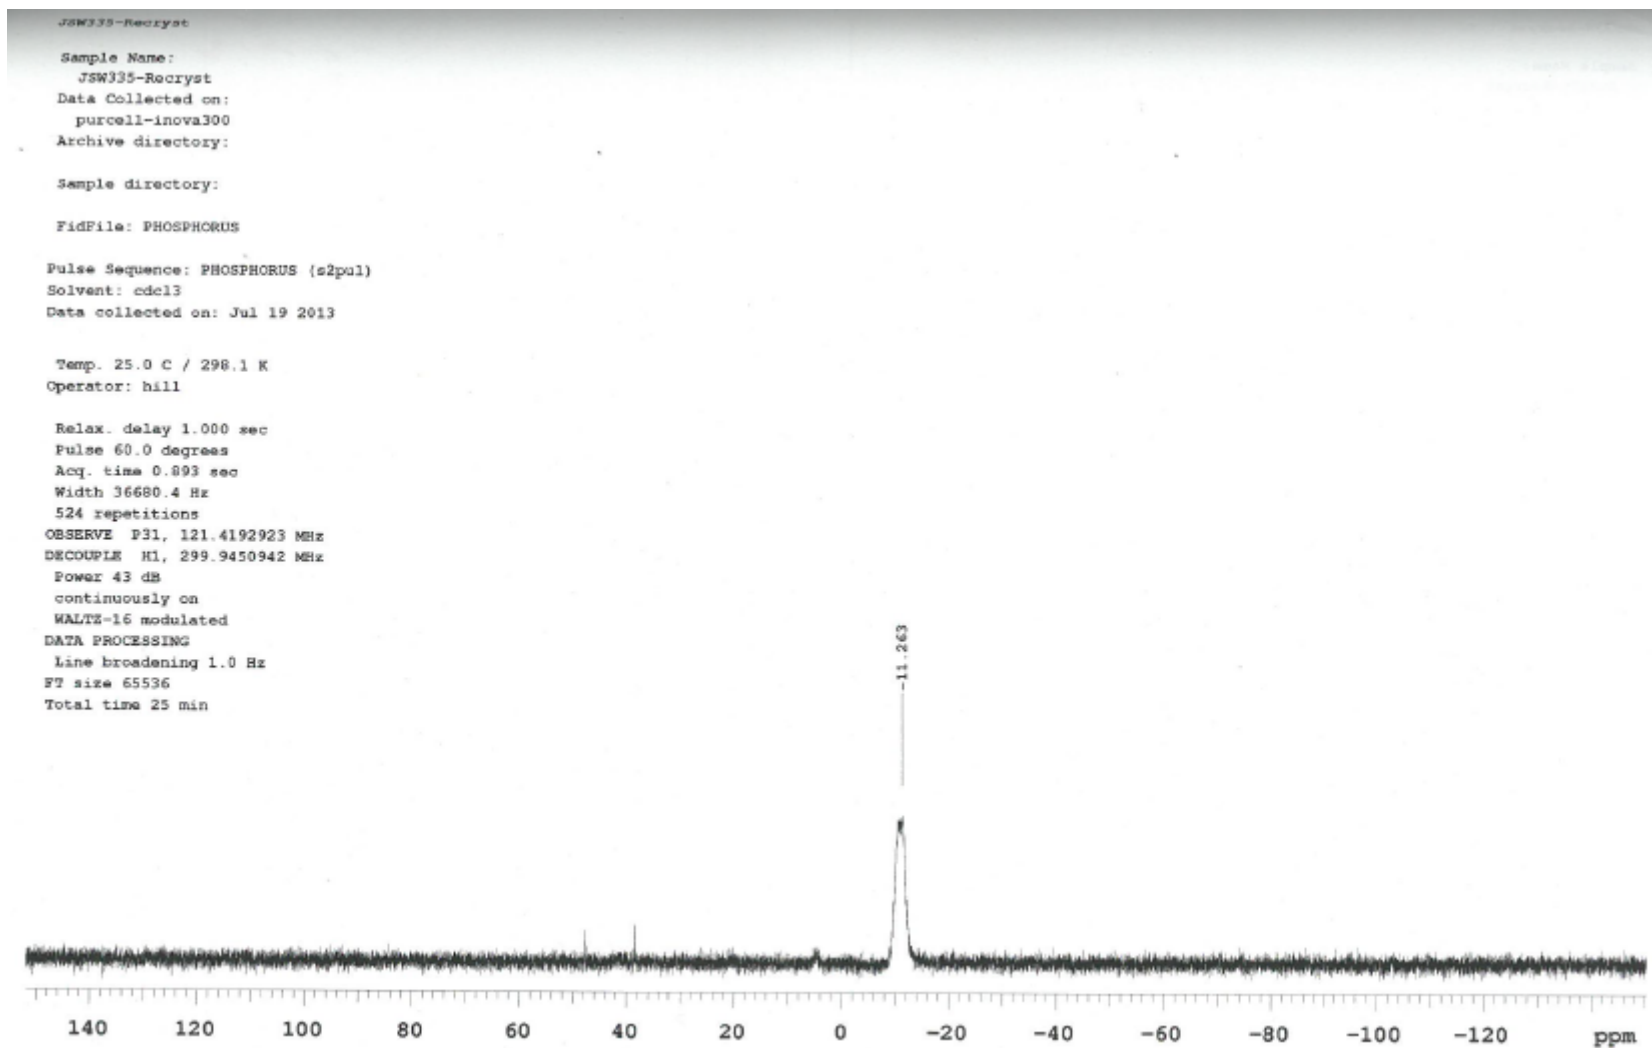

Compound 15 –  $^{31}\text{P}\{^1\text{H}\}$  NMR spectrum

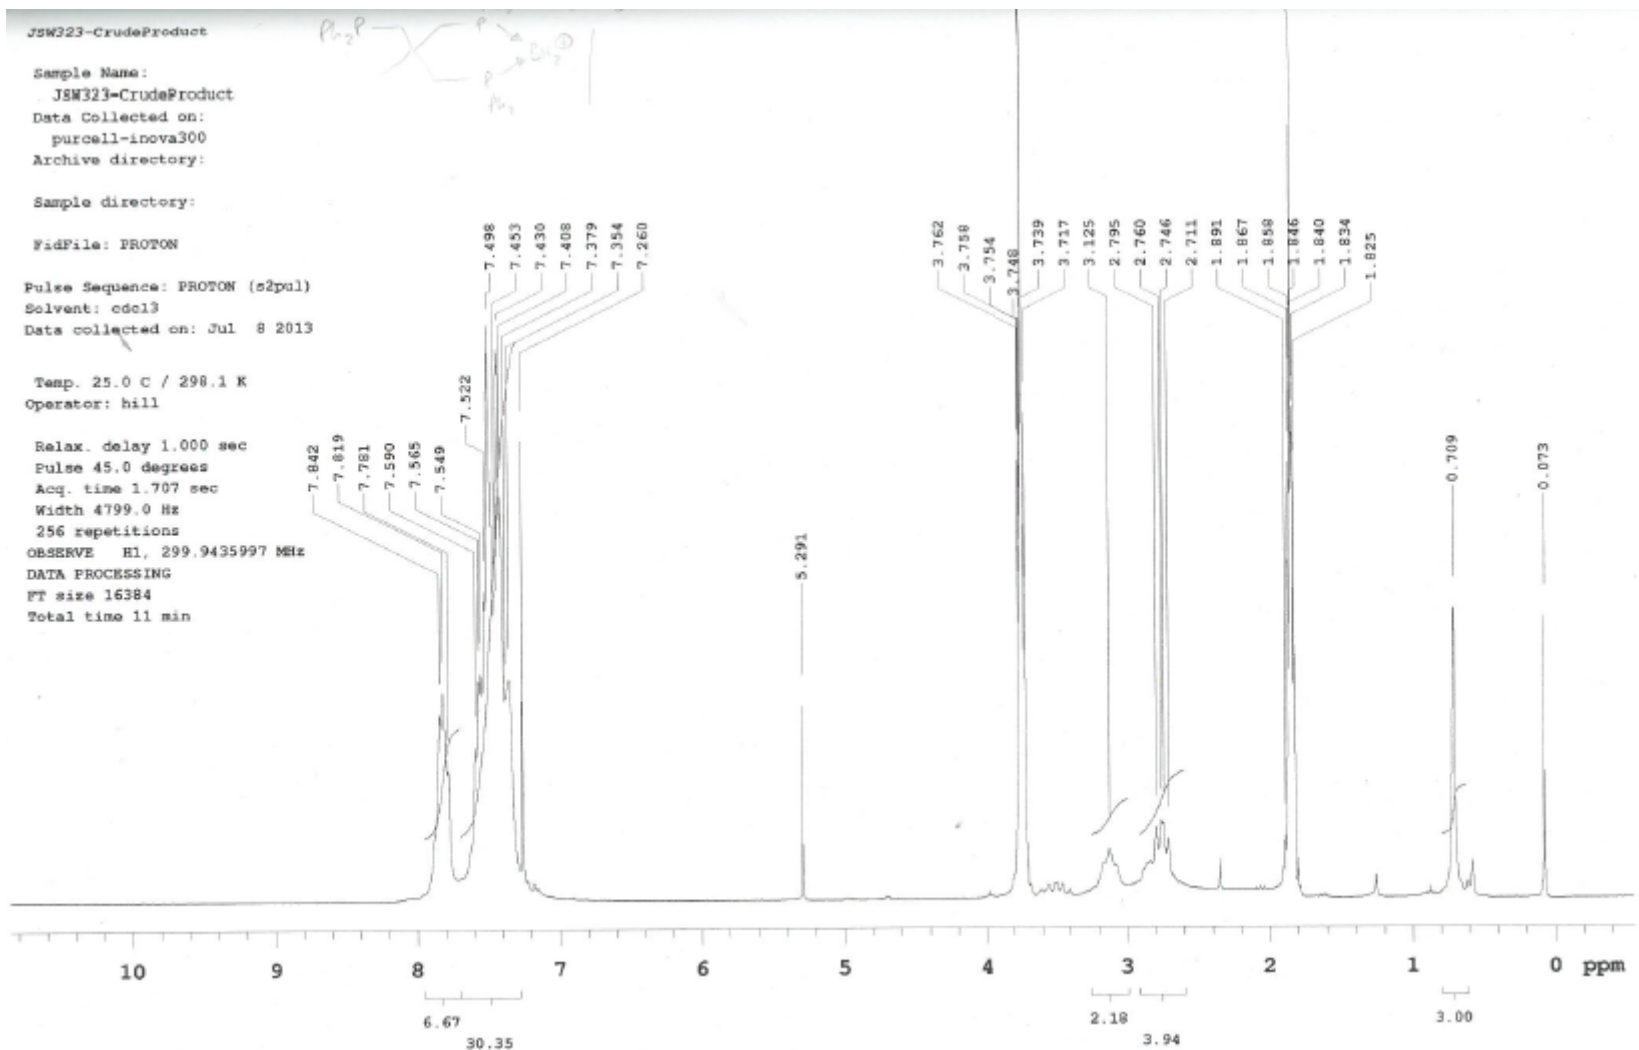

Compound 17 -  $^1\text{H}$  NMR spectrum

JSW323-CrudeProduct

Sample Name:

JSW323-CrudeProduct

Data Collected on:

purcell-inova300

Archive directory:

Sample directory:

FidFile: std1h

Pulse Sequence: std1h (s2pul)

Solvent: cdcl3

Data collected on: Jul 8 2013

Temp. 25.0 C / 298.1 K

Operator: hill

Relax. delay 0.100 sec

Pulse 75.0 degrees

Acq. time 0.273 sec

Width 60015.0 Hz

1120 repetitions

OBSERVE B11, 96.2339197 MHz

DECOUPLE H1, 299.9450942 MHz

Power 43 dB

continuously on

WALTZ-16 modulated

DATA PROCESSING

Line broadening 3.0 Hz

FT size 32768

Total time 12 min

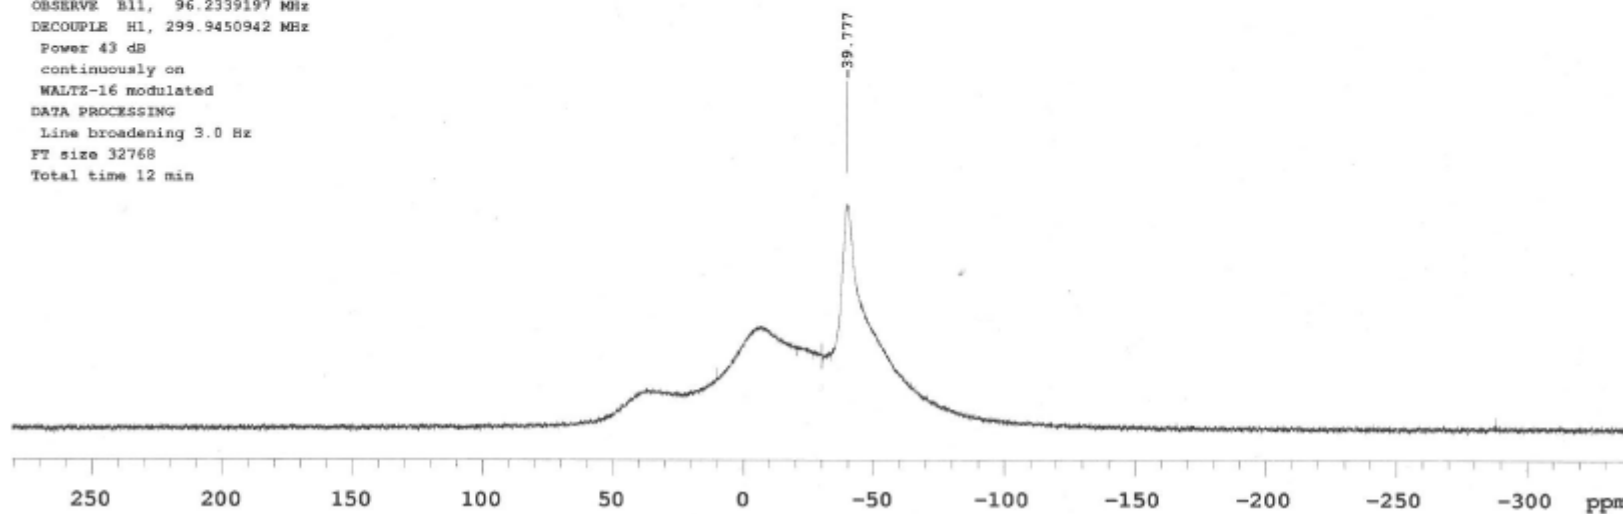

Compound 17 –  $^{11}\text{B}\{^1\text{H}\}$  NMR spectrum

JSM323-CrudeProduct

Sample Name:  
JSM323-CrudeProduct  
Data Collected on:  
parcell-inova300  
Archive directory:

Sample directory:

FidFile: CARBON

Pulse Sequence: CARBON (s2pul)  
Solvent: cdcl3  
Data collected on: Jul 8 2013

Temp. 25.0 C / 298.1 K  
Operator: hill

Relax. delay 3.000 sec  
Pulse 45.0 degrees  
Acq. time 0.869 sec  
Width 18854.6 Hz  
14316 repetitions  
OBSERVE C13, 75.4208679 MHz  
DECOUPLE H1, 299.9450942 MHz  
Power 43 dB  
continuously on  
WALTZ-16 modulated  
DATA PROCESSING  
Line broadening 1.0 Hz  
FT size 32768  
Total time 18 hr, 18 min

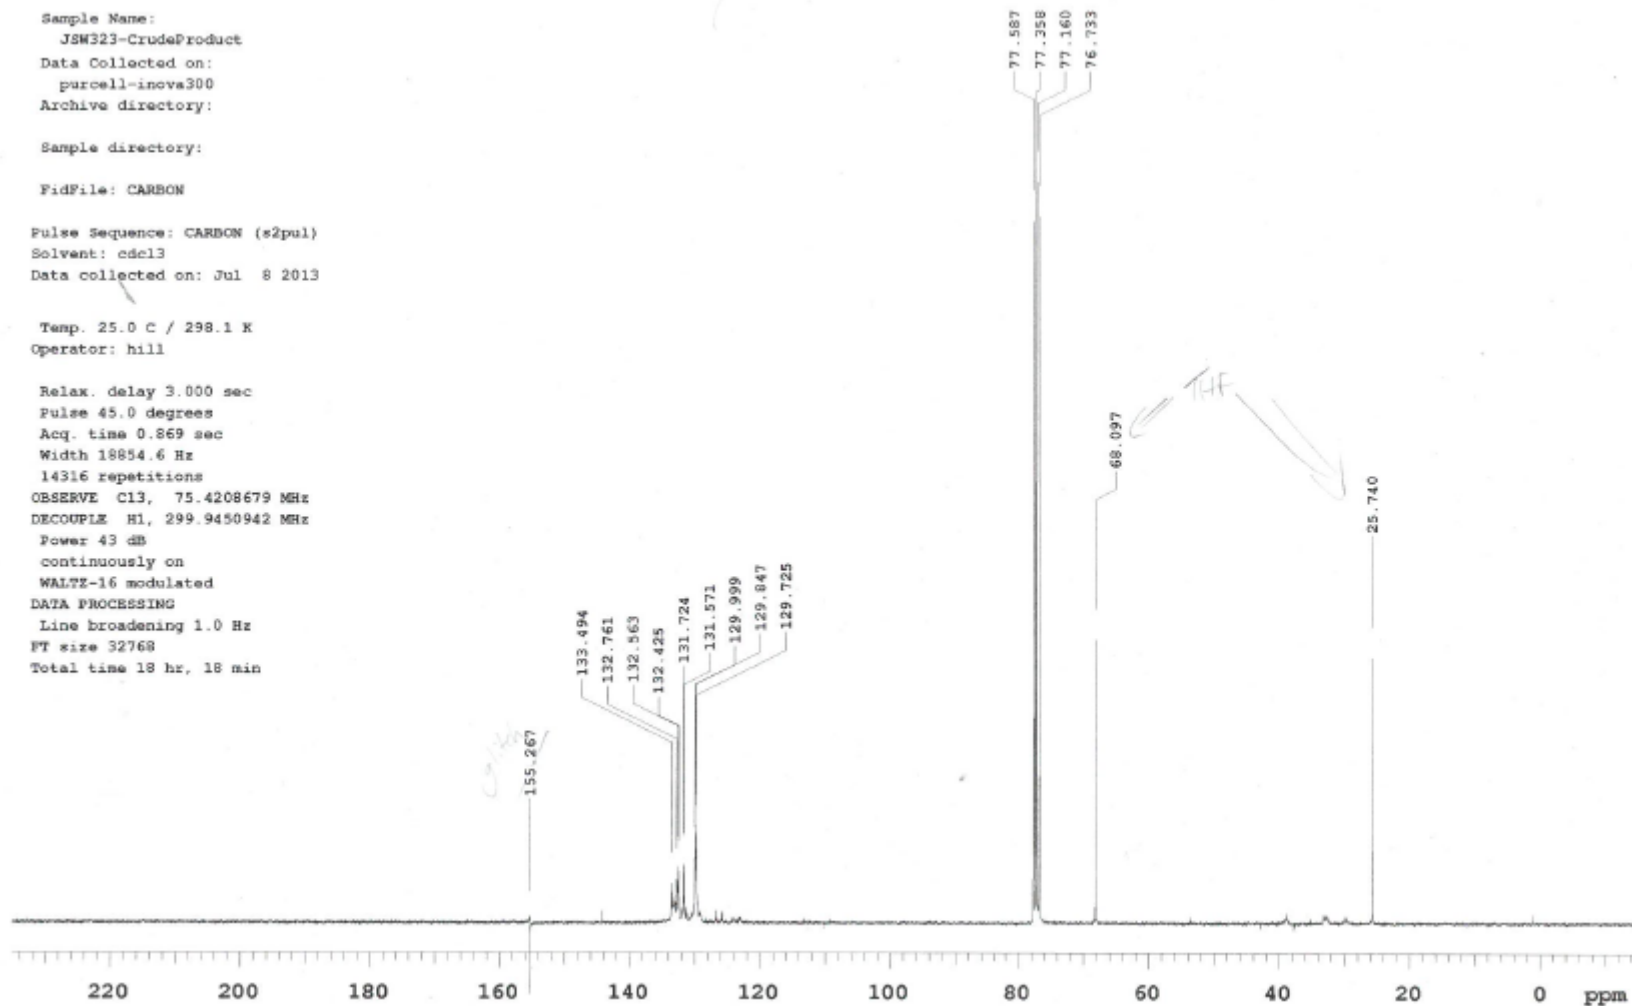

Compound 17 -  $^{13}\text{C}\{^1\text{H}\}$  NMR spectrum

J5W323-CrudeProduct

Sample Name:  
J5W323-CrudeProduct  
Data Collected on:  
purcell-inova300  
Archive directory:

Sample directory:

Fidfile: PHOSPHORUS

Pulse Sequence: PHOSPHORUS (s2pul)  
Solvent: cdc13  
Data collected on: Jul 8 2013

Temp. 25.0 C / 298.1 K  
Operator: hill

Relax. delay 1.000 sec  
Pulse 60.0 degrees  
Acq. time 0.893 sec  
Width 36680.4 Hz  
600 repetitions  
OBSERVE P31, 121.4192923 MHz  
DECOUPLE H1, 299.9450942 MHz  
Power 43 dB  
continuously on  
WALTZ-16 modulated  
DATA PROCESSING  
Line broadening 1.0 Hz  
FT size 65536  
Total time 19 min

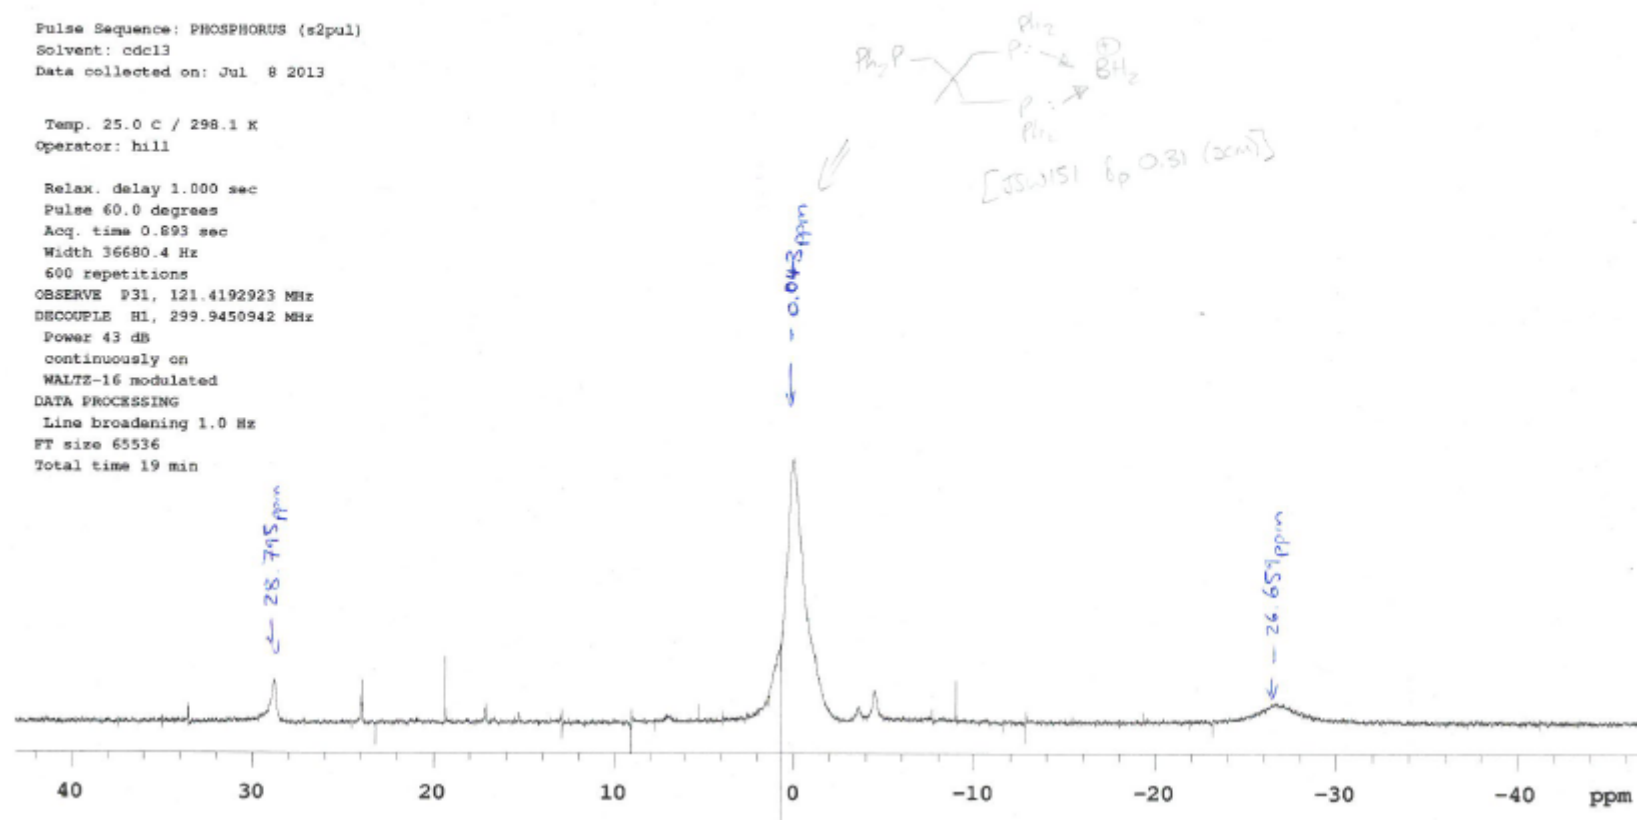

Compound 17 -  $^{31}\text{P}\{^1\text{H}\}$  NMR spectrum

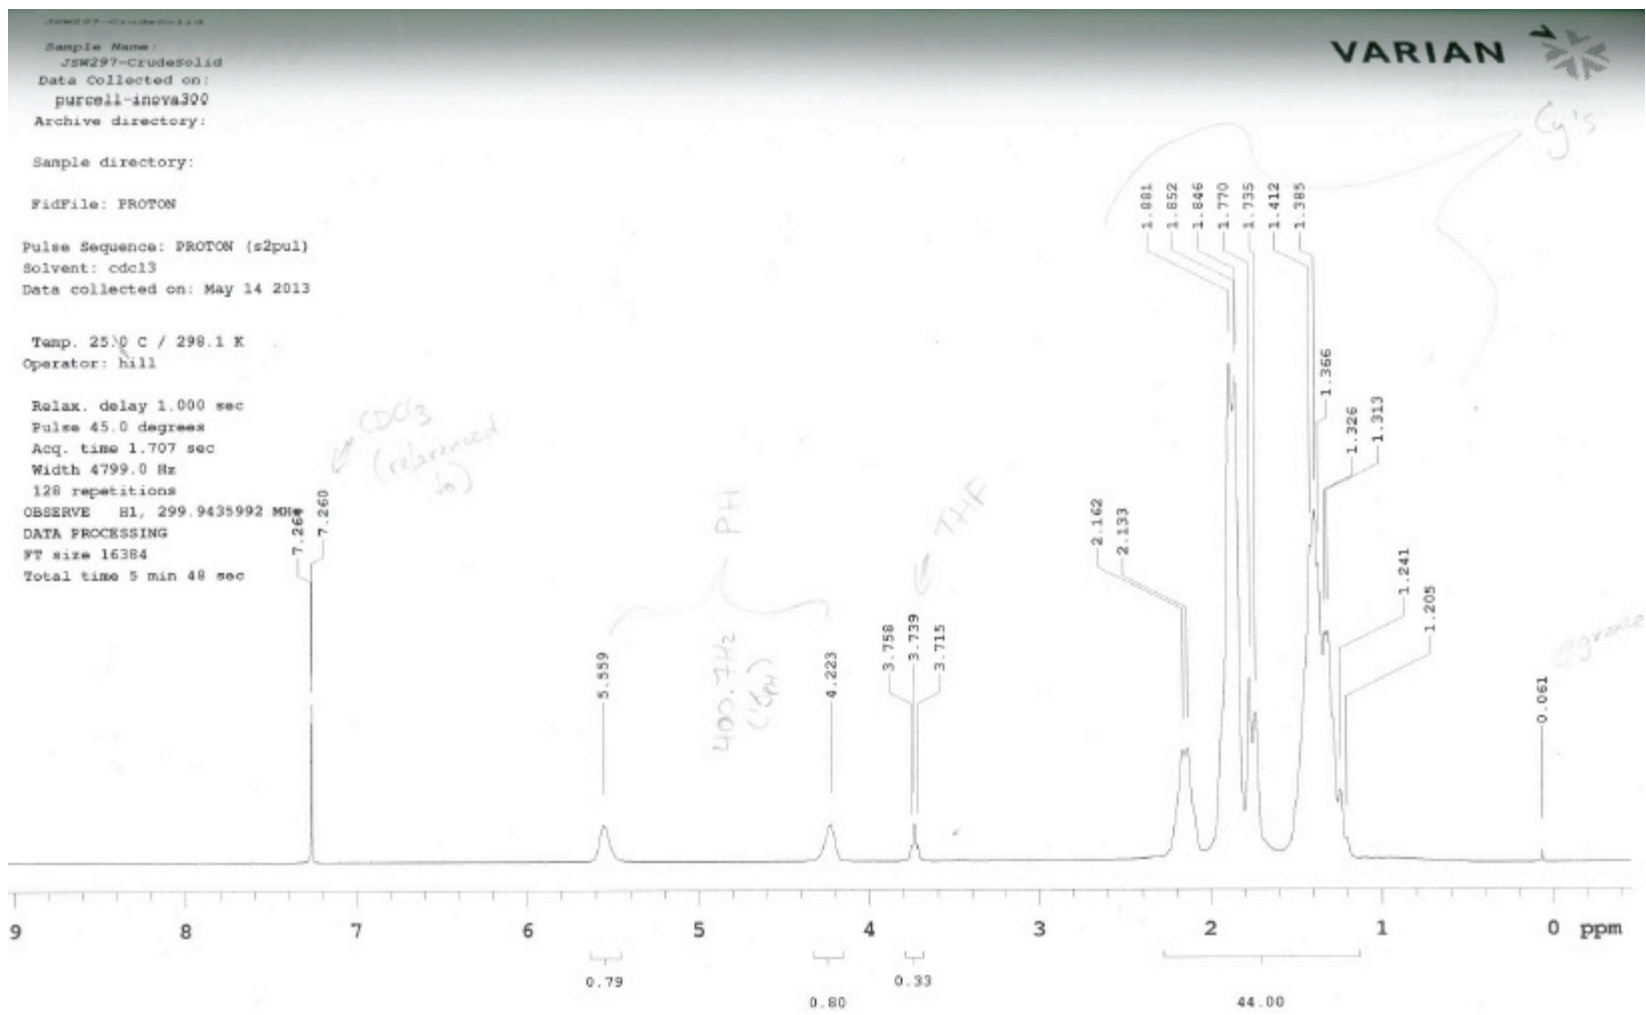

Compound 18 – <sup>1</sup>H NMR spectrum

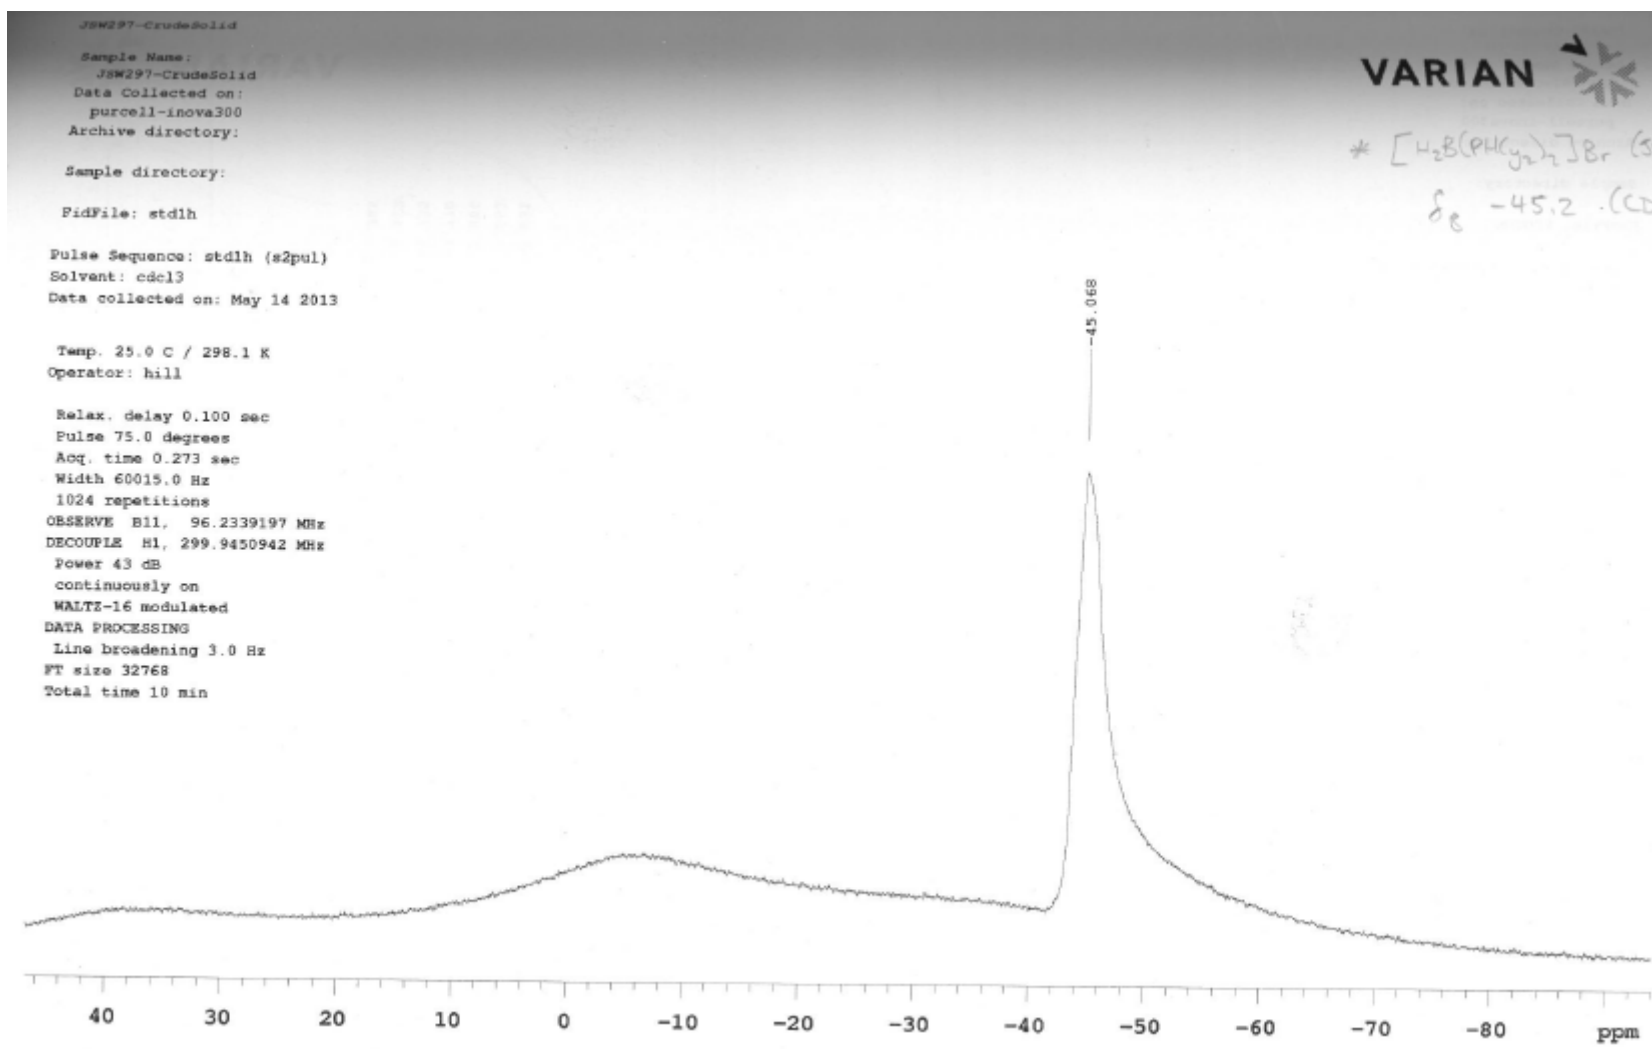

Compound 18 -  $^{11}B\{^1H\}$  NMR spectrum



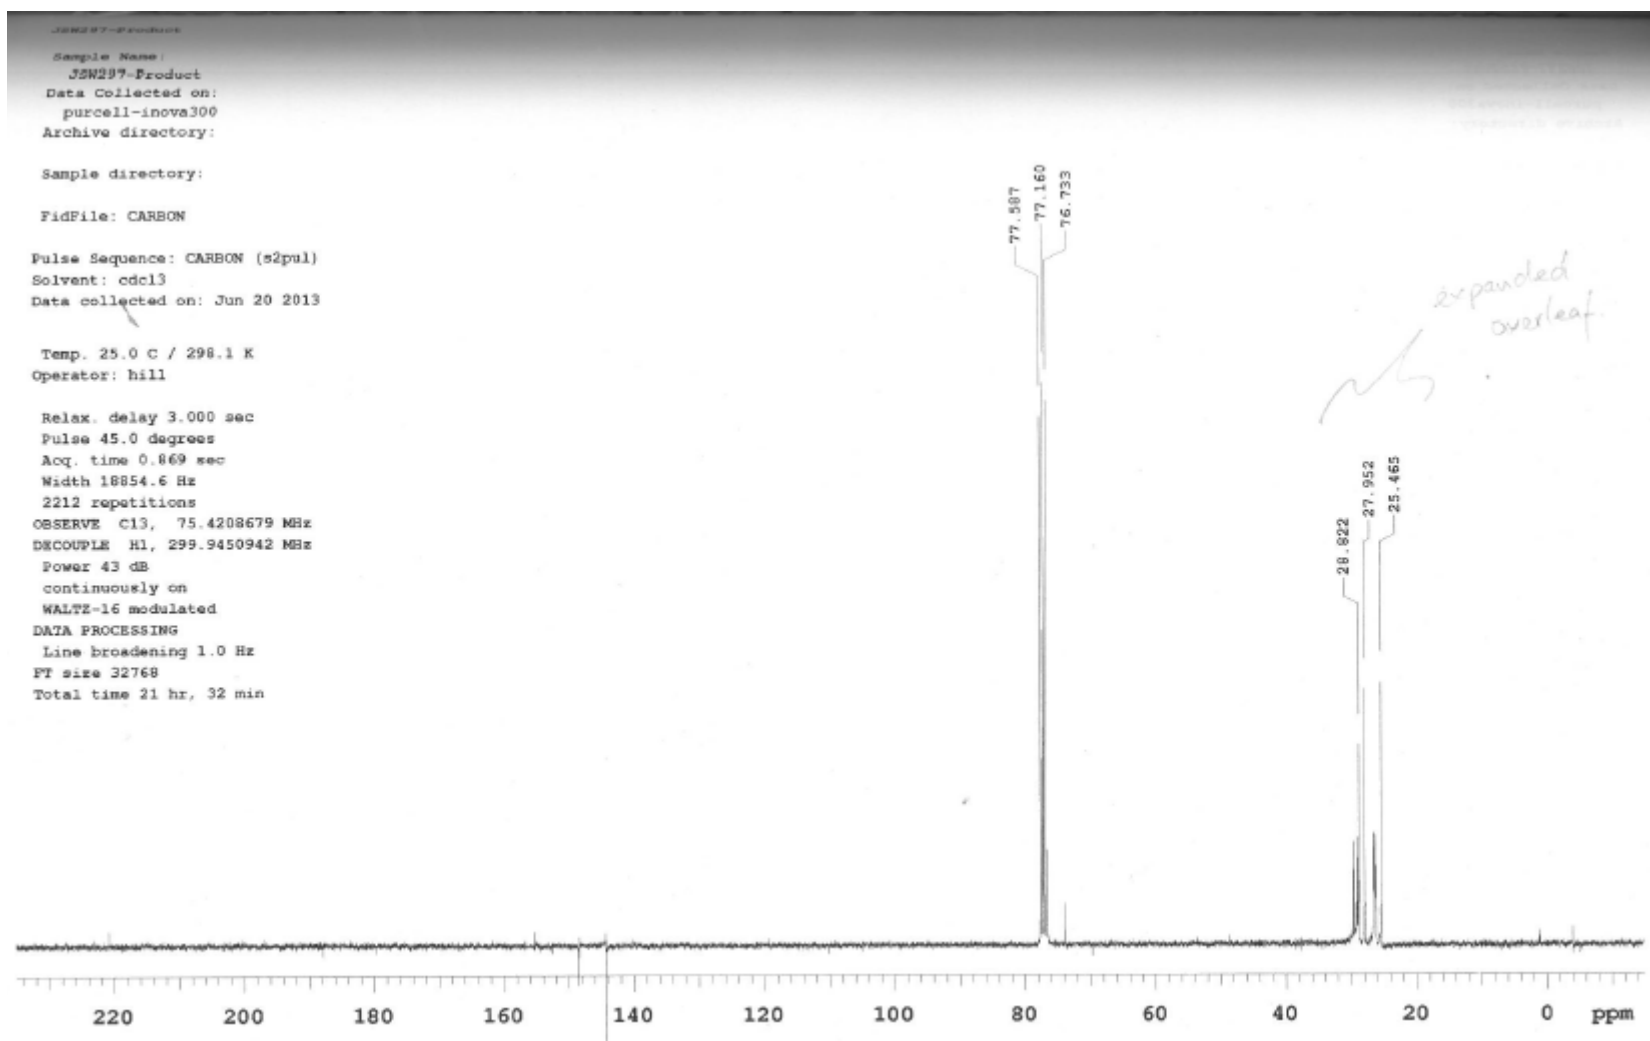

Compound 18 -  $^{13}\text{C}\{^1\text{H}\}$  NMR spectrum

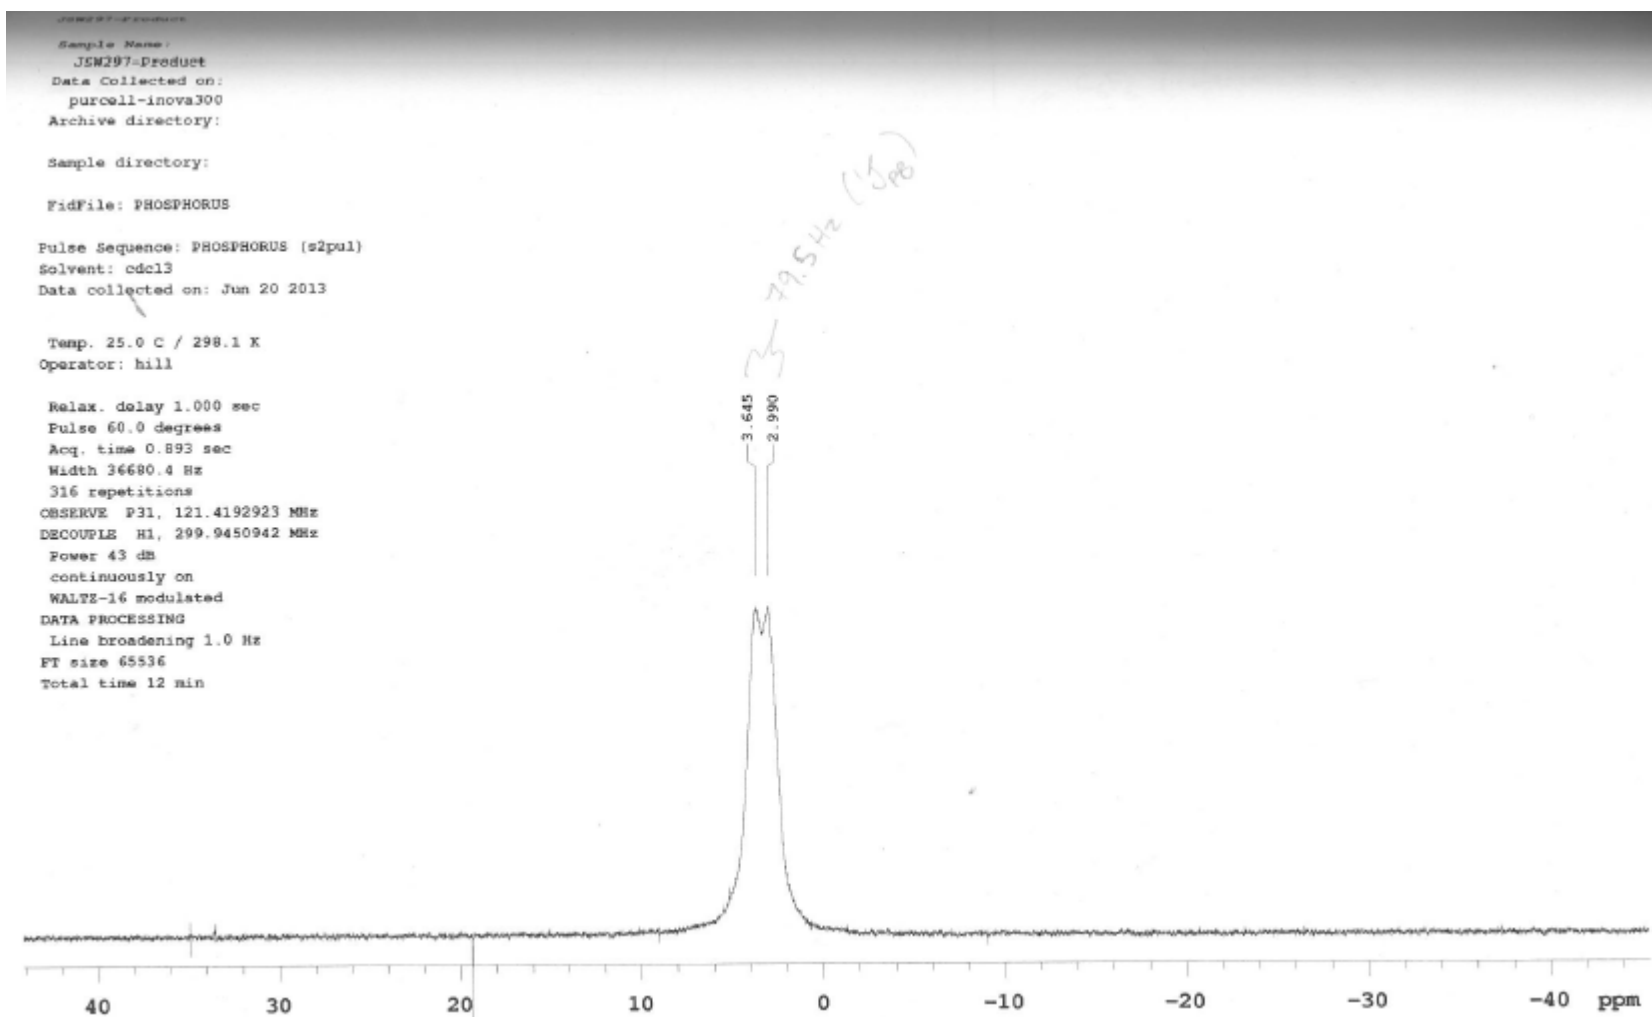

Compound 18 –  $^{31}\text{P}\{^1\text{H}\}$  NMR spectrum

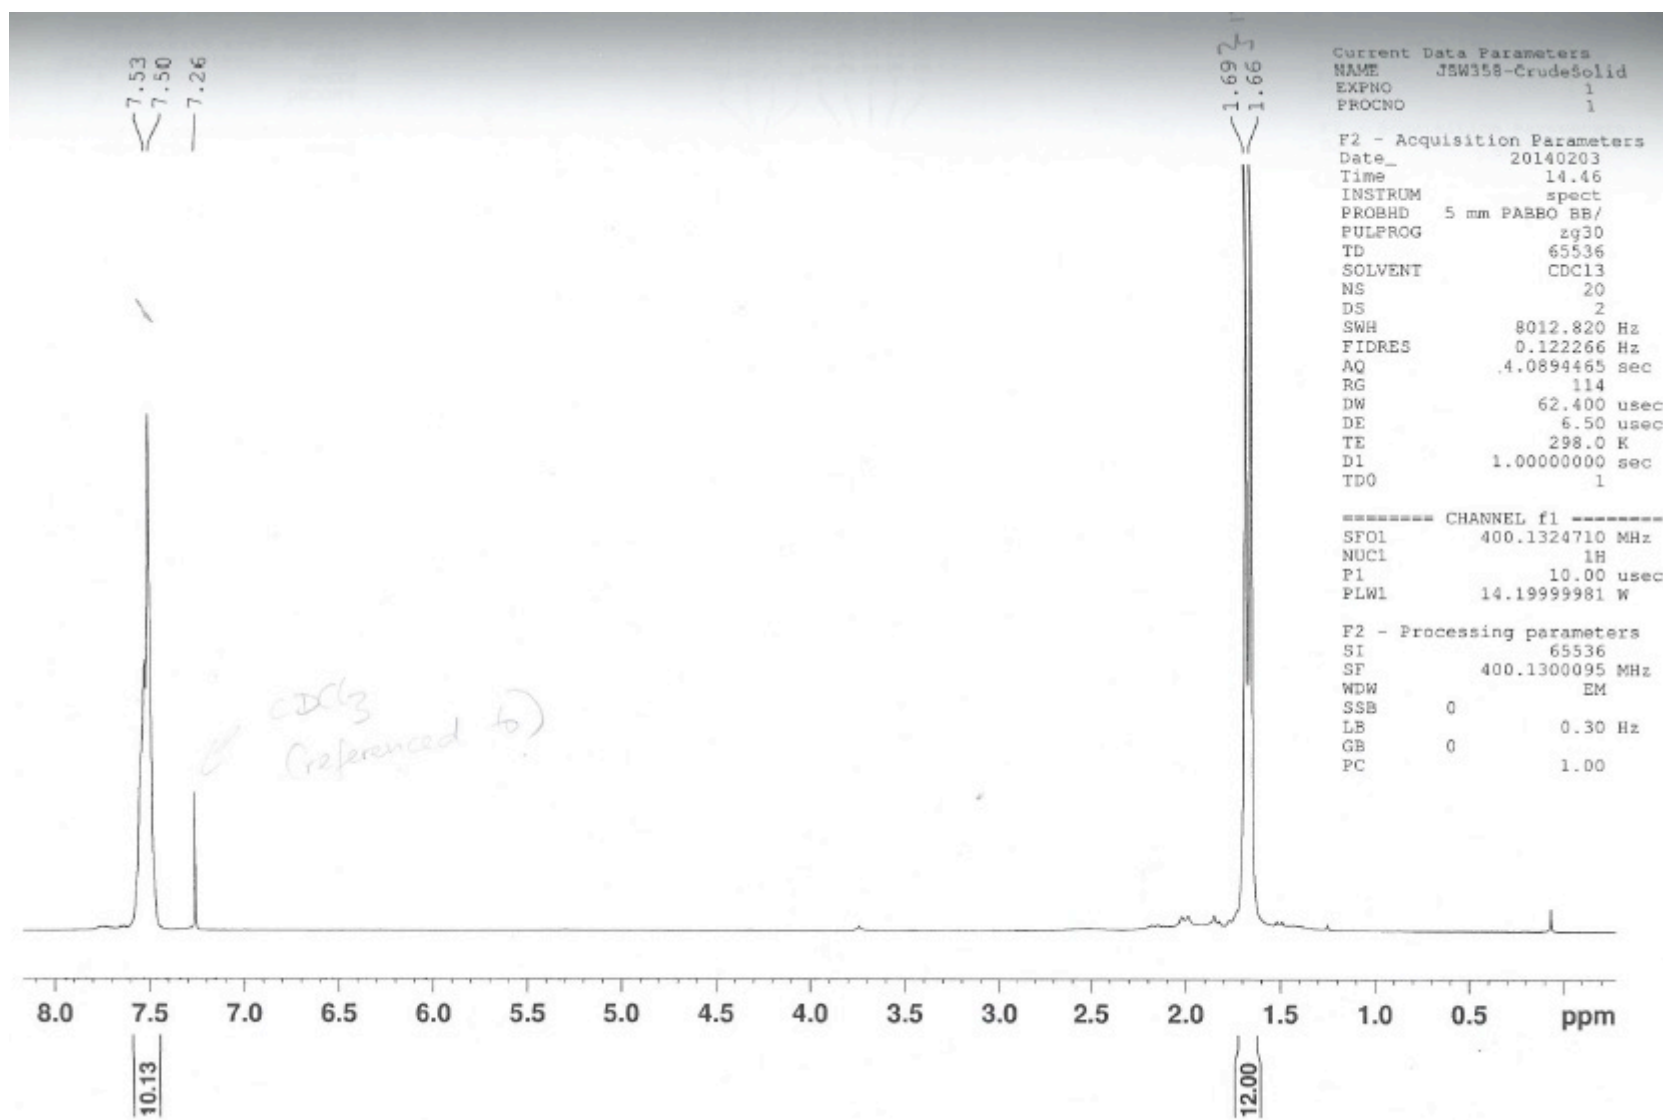

Compound 19 – <sup>1</sup>H NMR spectrum

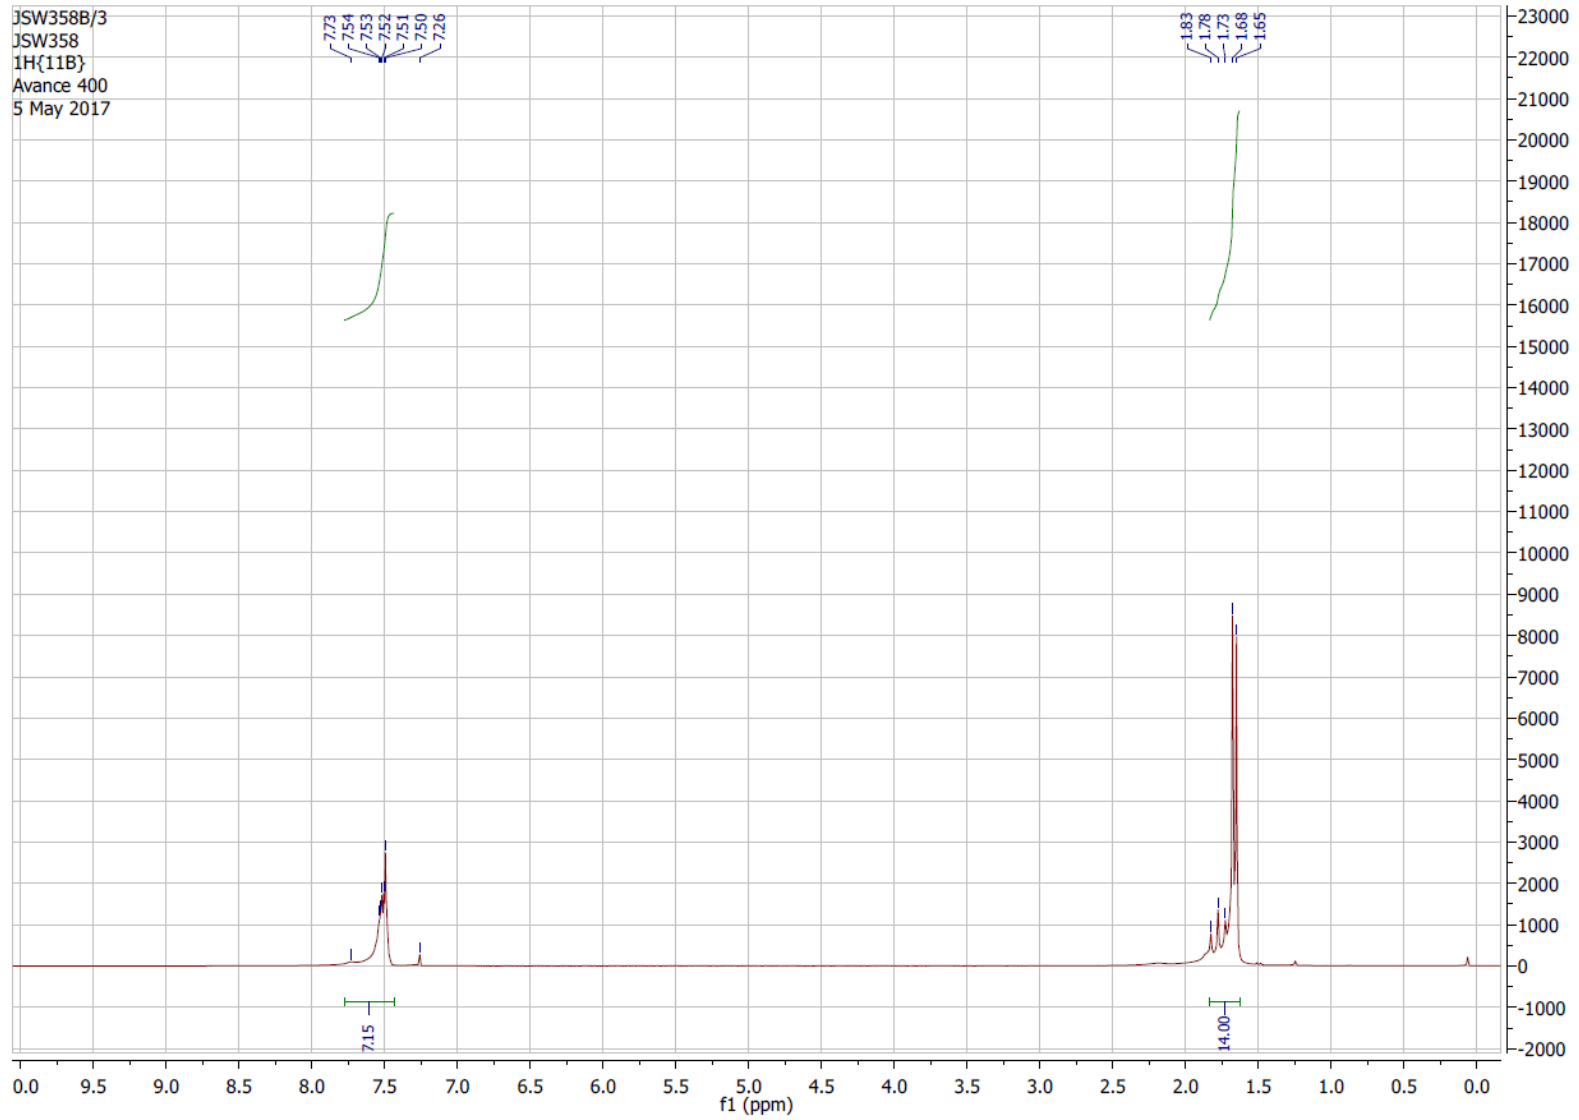

Compound 19 –  $^1\text{H}\{^{11}\text{B}\}$  NMR spectrum

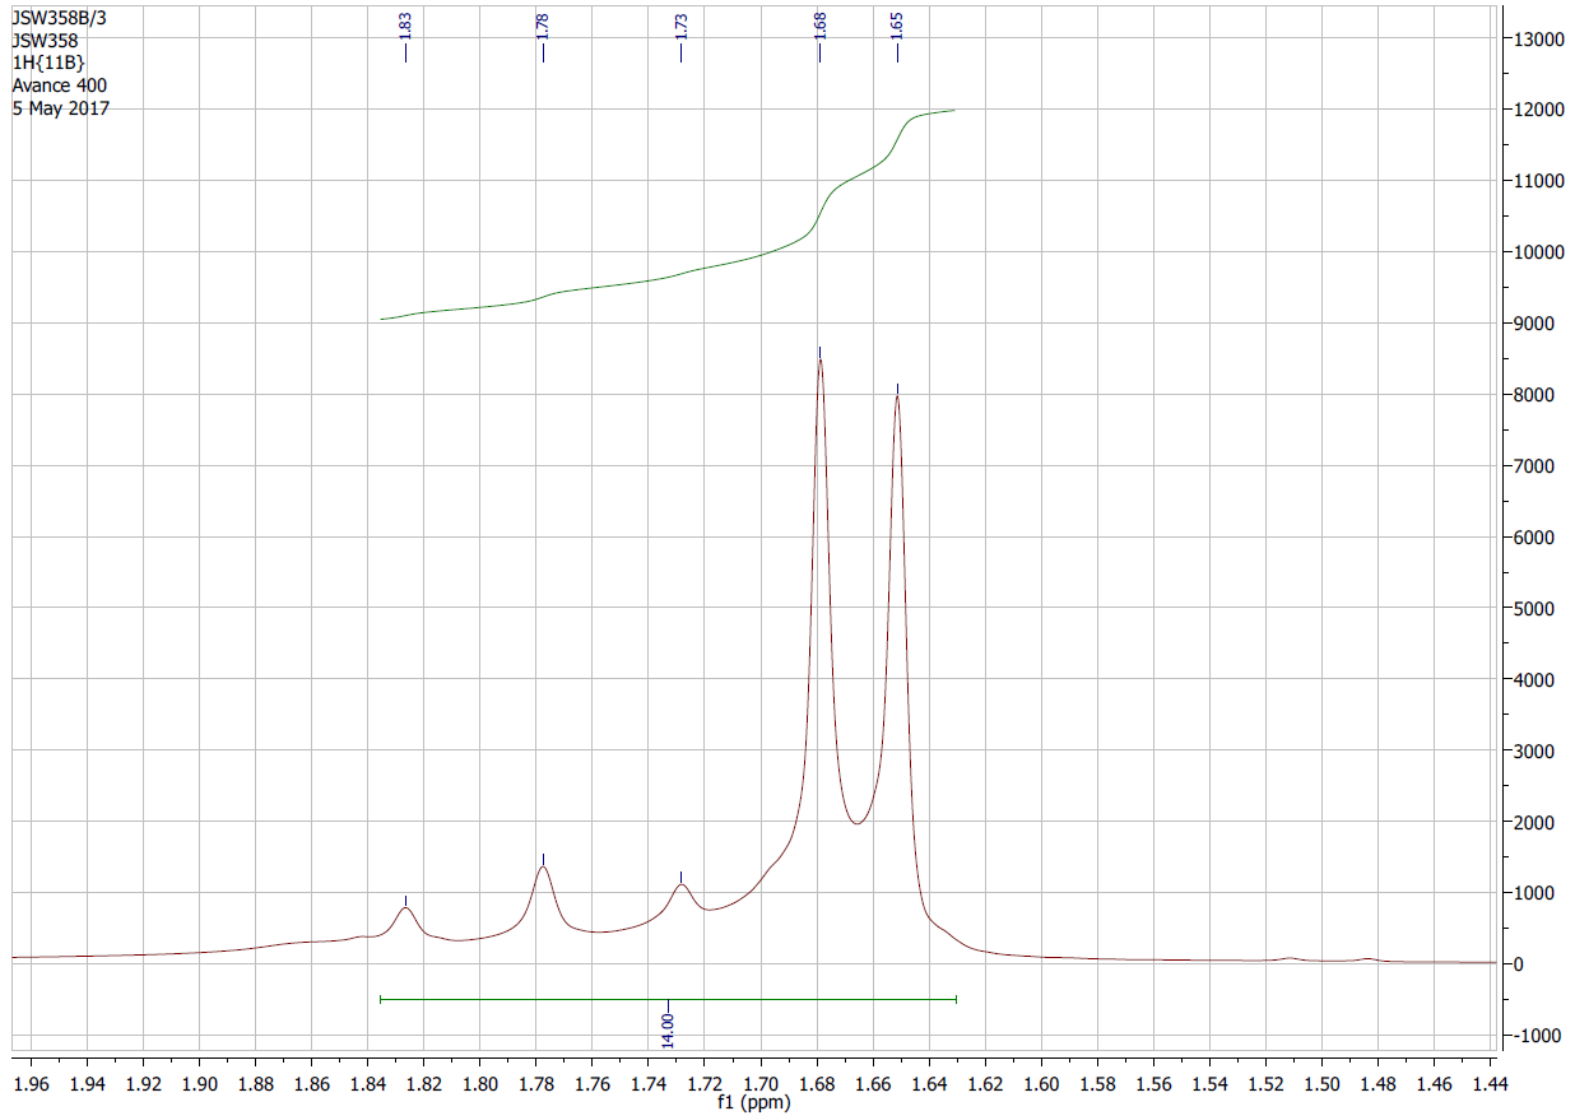

Compound 19 –  $^1\text{H}\{^{11}\text{B}\}$  NMR spectrum (Expansion of  $\text{BH}_2$  resonance)

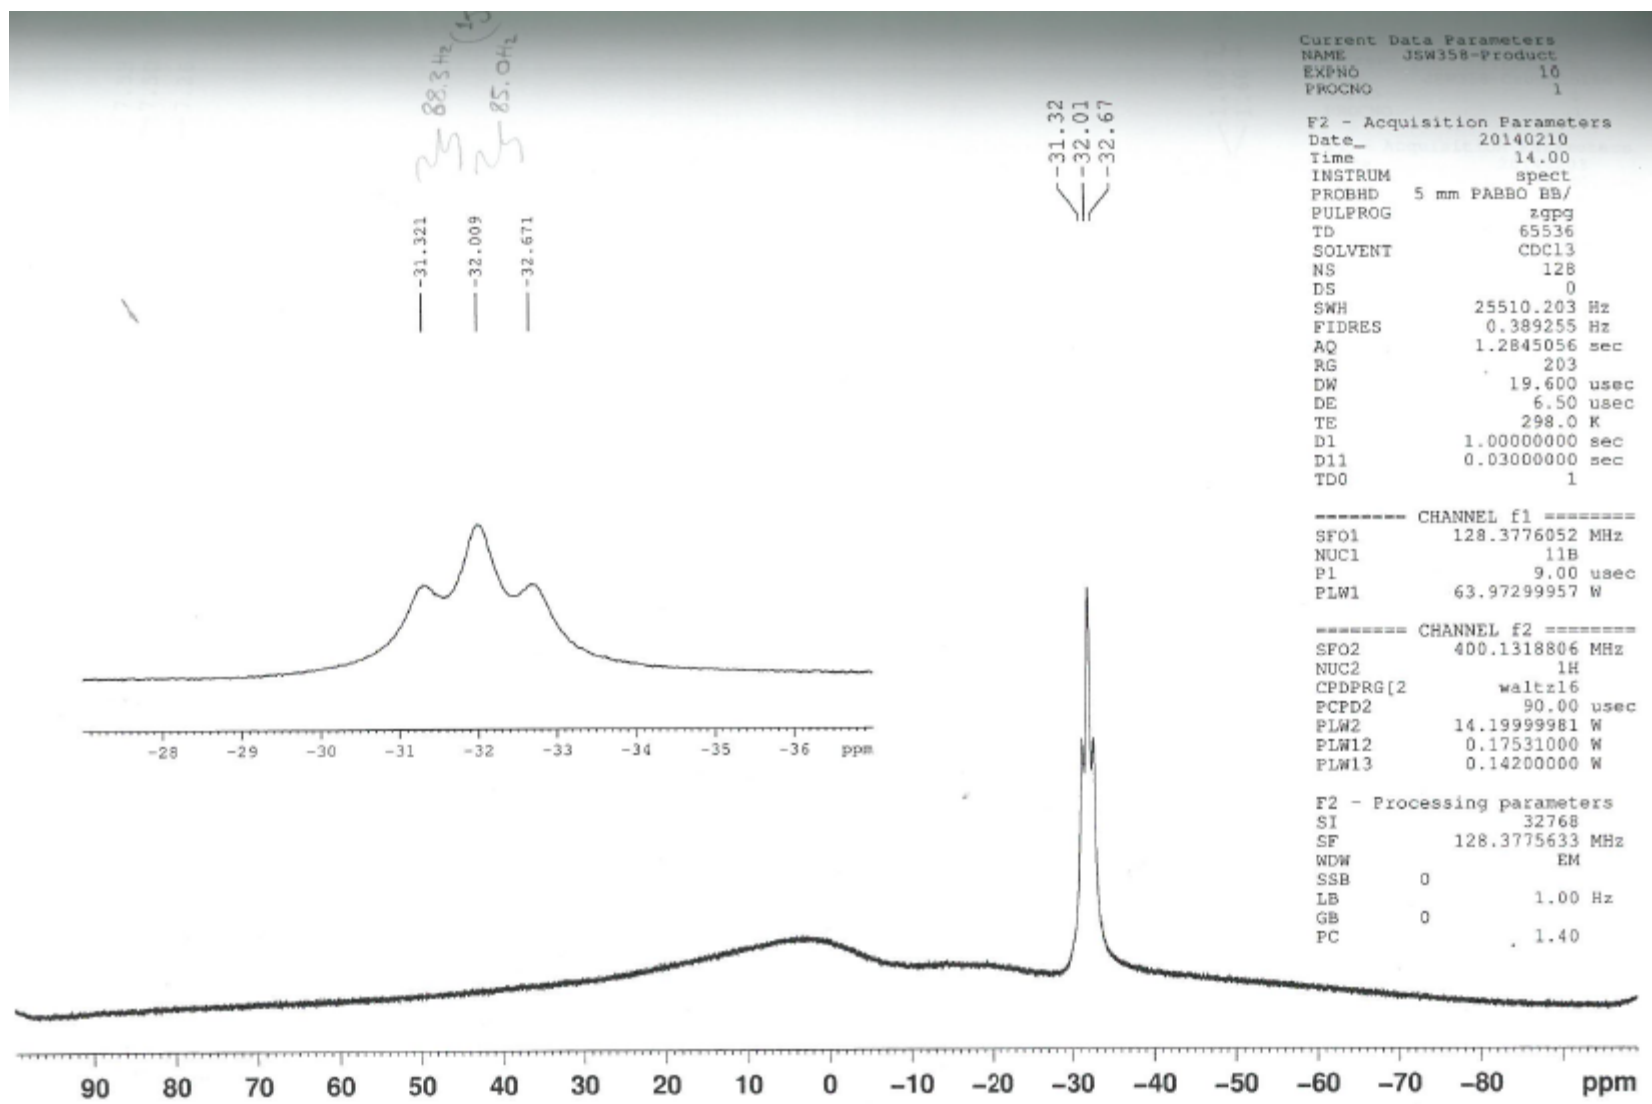

Compound 19 –  $^{11}\text{B}\{^1\text{H}\}$  NMR spectrum

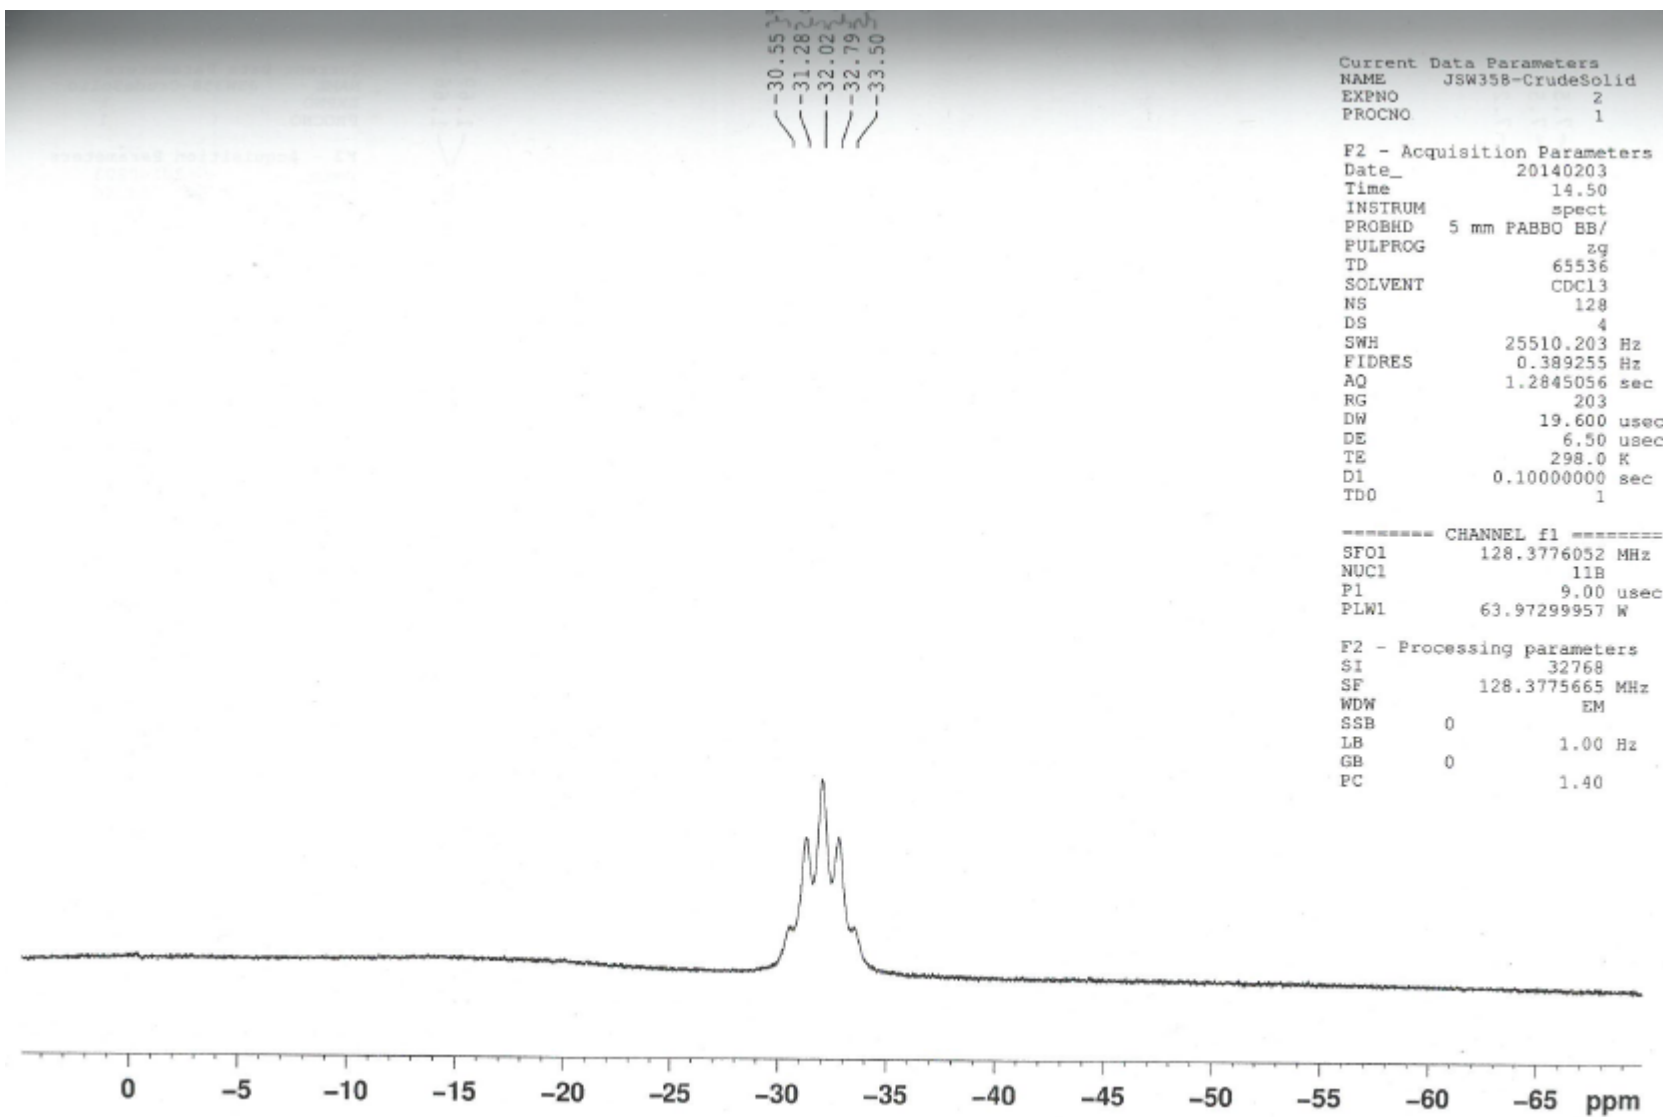

Compound 19 -  $^{11}\text{B}$  NMR spectrum

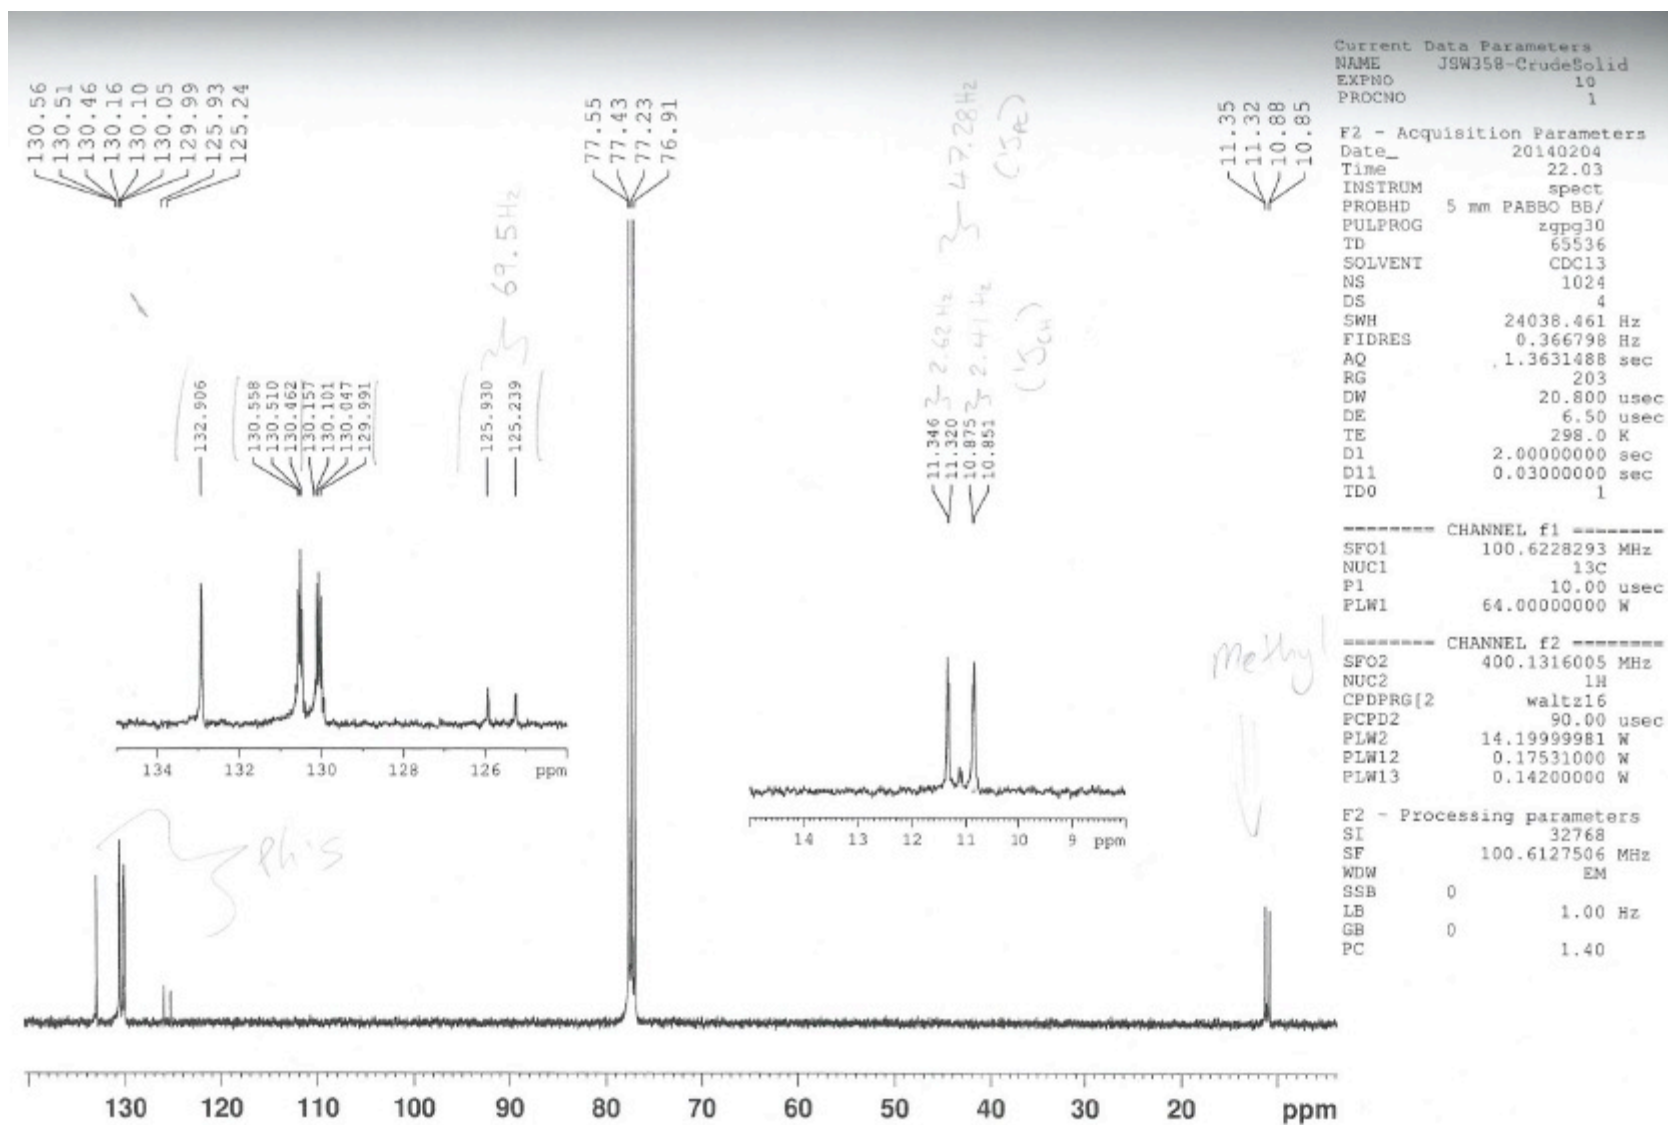

Compound 19 –  $^{13}\text{C}\{^1\text{H}\}$  NMR spectrum



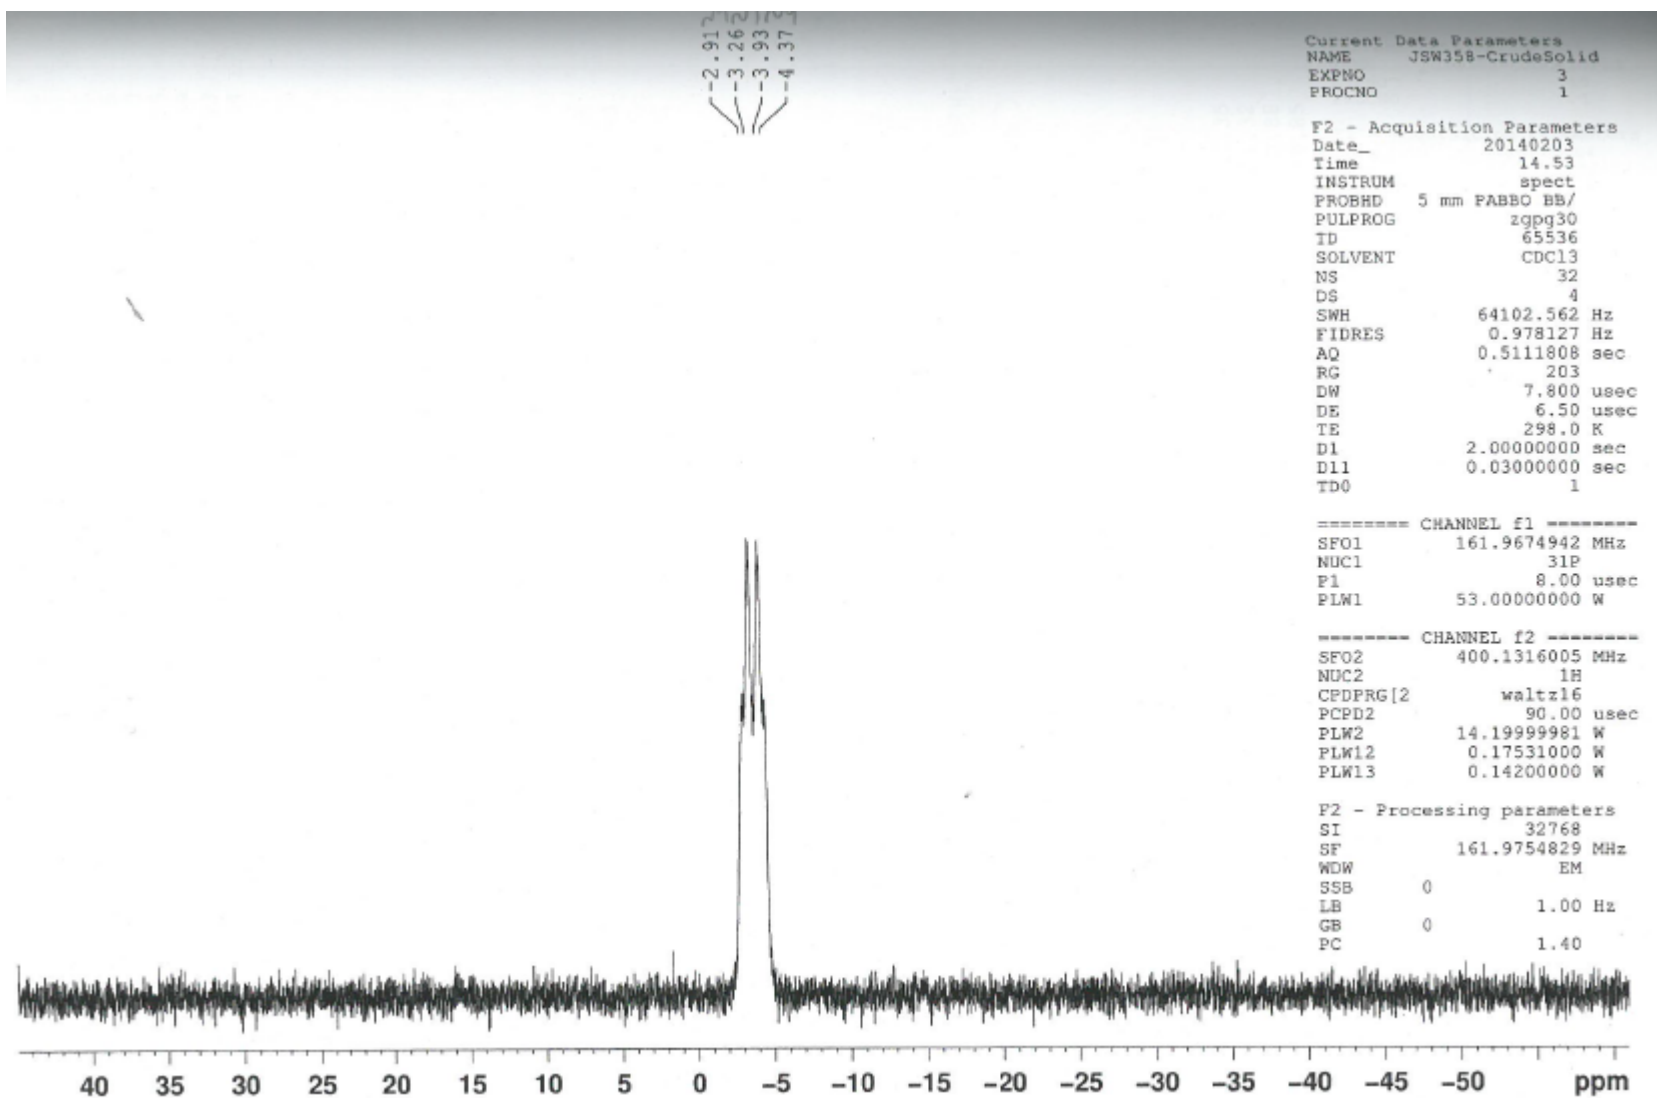

Compound 19 –  $^{31}\text{P}\{^1\text{H}\}$  NMR spectrum

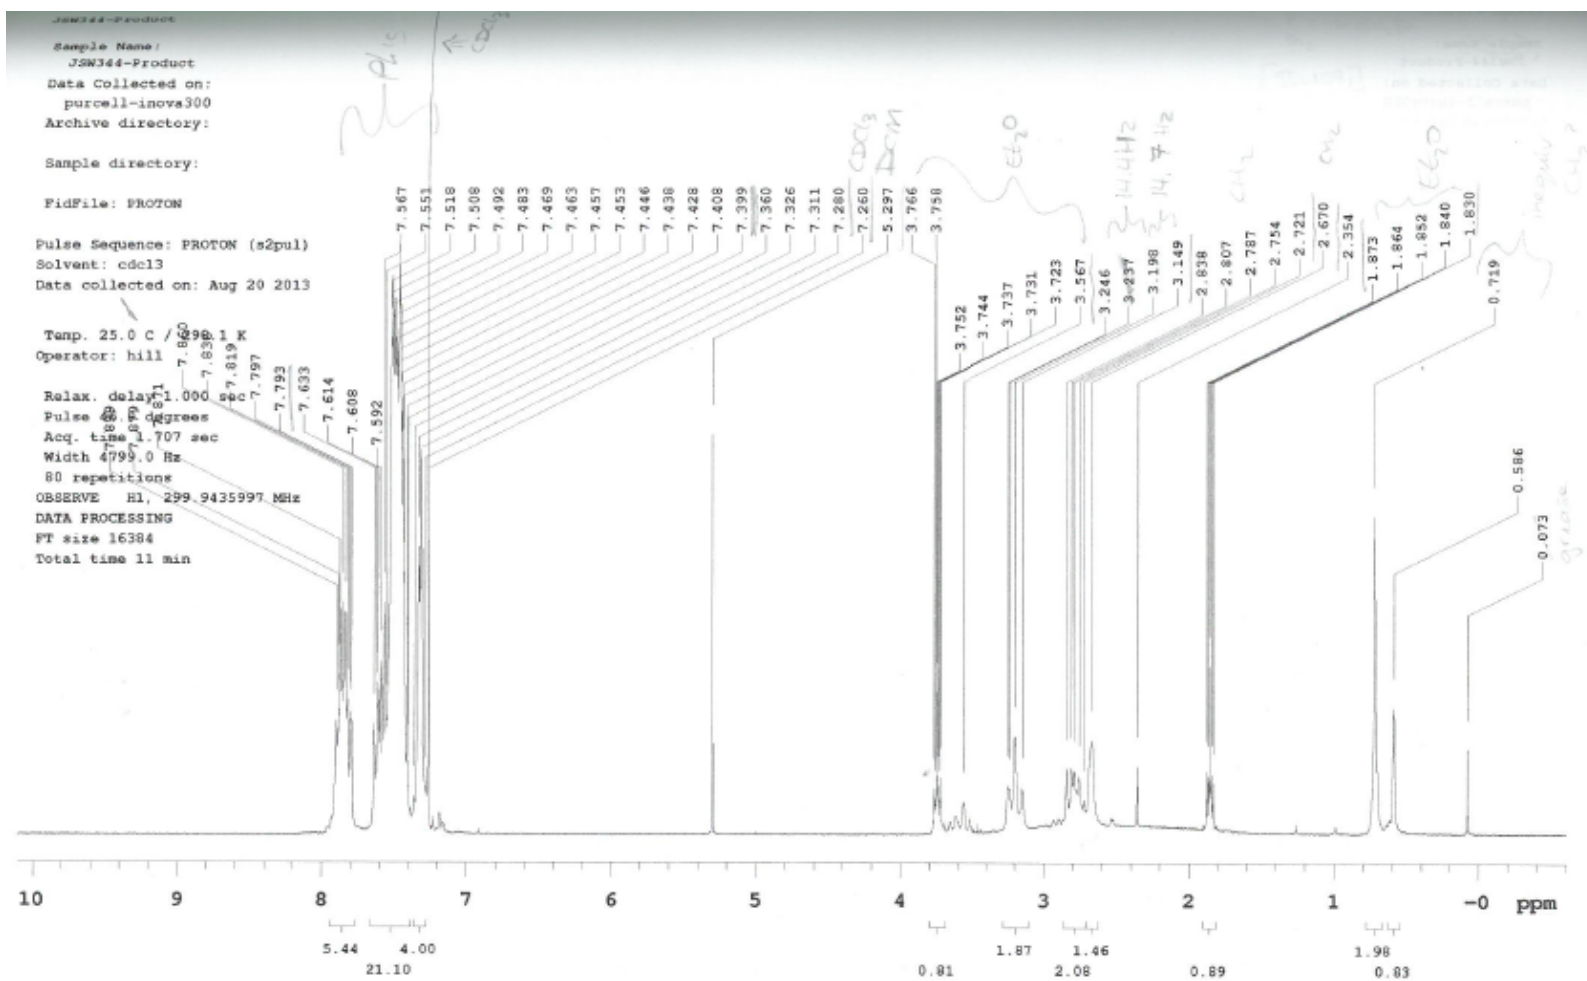

Compound 20 -  $^1\text{H}$  NMR spectrum

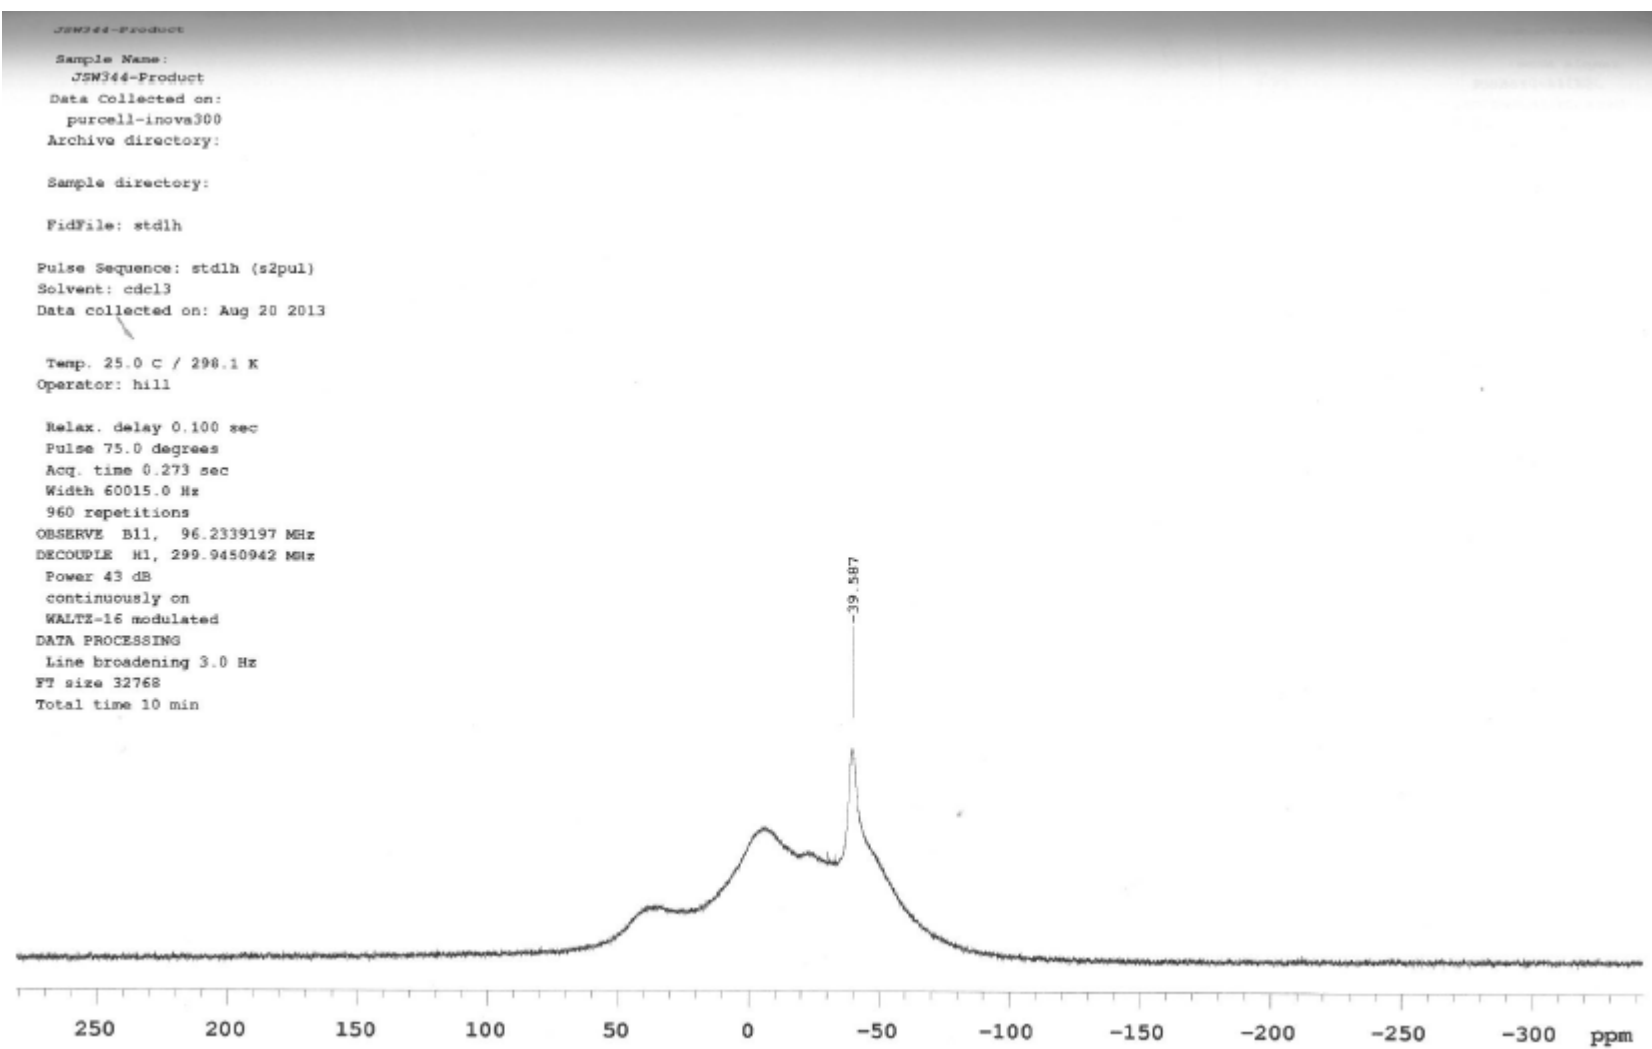

Compound 20 –  $^{11}\text{B}\{^1\text{H}\}$  NMR spectrum

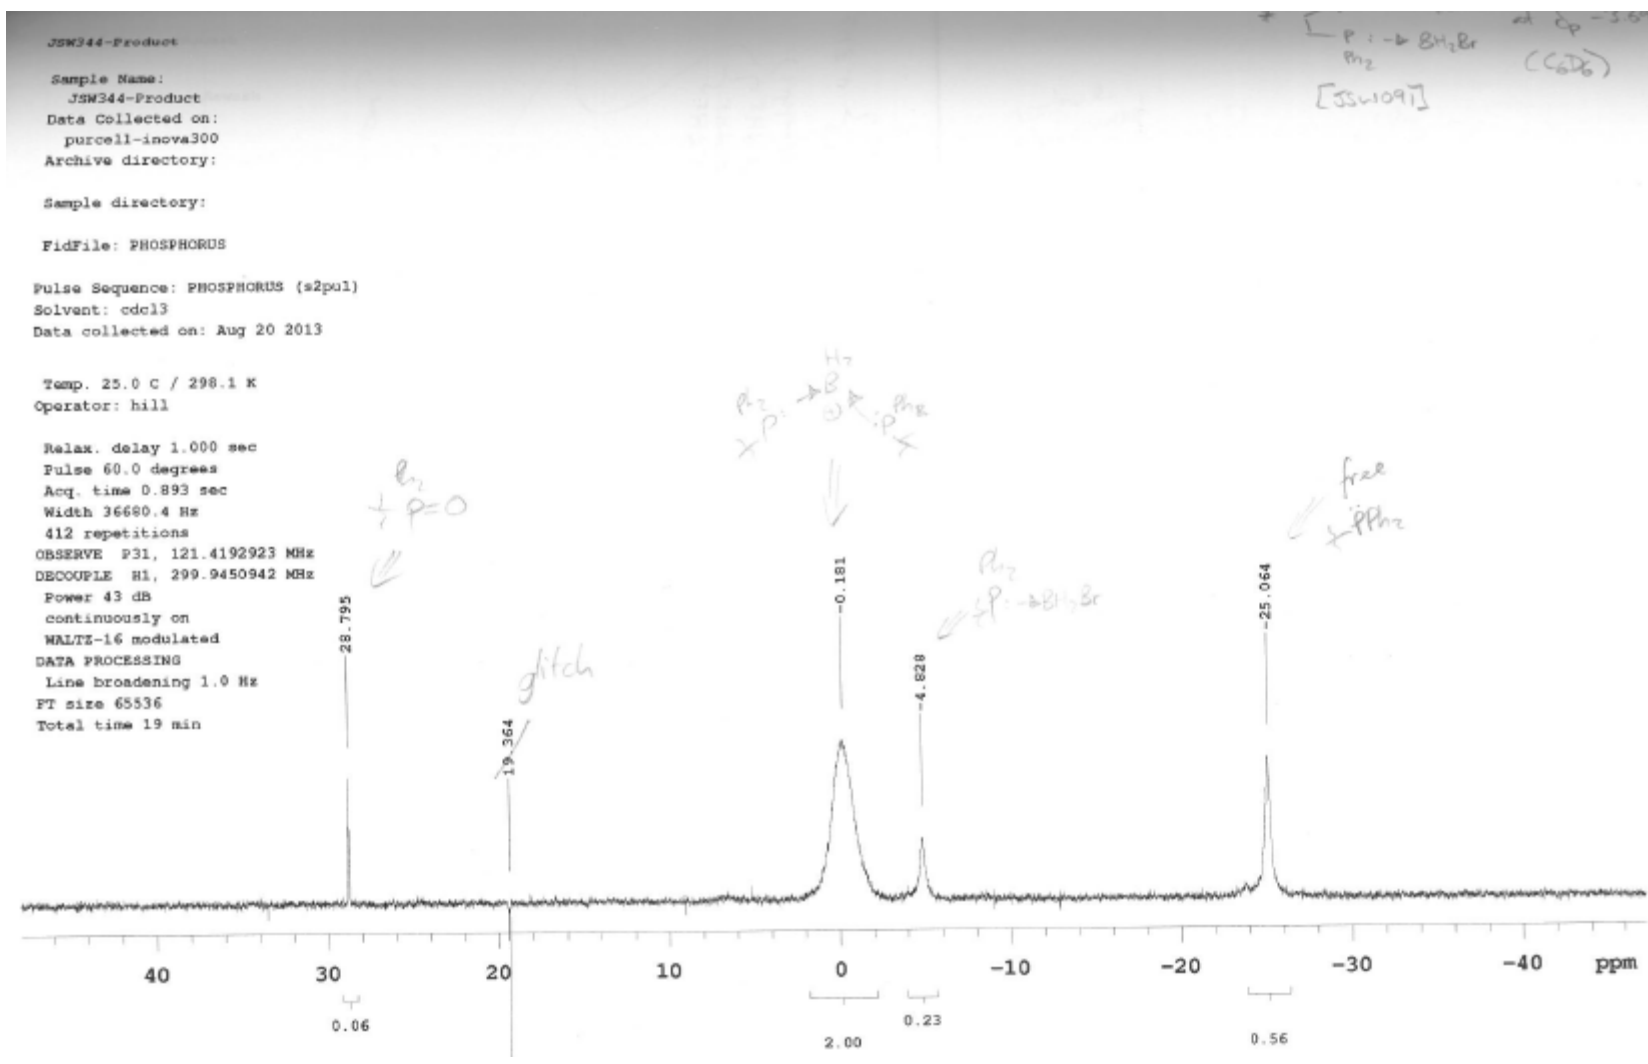

Compound 20 -  $^{31}\text{P}\{^1\text{H}\}$  NMR spectrum
